# Supplementary material for: Zinc and cobalt complexes based on tripodal ligands: synthesis, structure and reactivity toward lactide
Source: Royal Society of Chemistry journal article supplement (doi:10.1039/c3dt52629a), 2014-01-01
Supplement: c3dt52629a.pdf [file c3dt52629a.pdf]

# Zinc and Cobalt Complexes Based on Tripodal Ligands: Synthesis, Structure and Reactivity toward Lactide

Mathieu J.-L. Tschan, Jia Guo, Sumesh K. Raman, Emilie Brulé, Thierry Roisnel, Marie-Noelle Rager, Rémi Legay, Guillaume Durieux, Baptiste Rigaud, Christophe M. Thomas\*

**General considerations.** NMR spectra were recorded on a Bruker Avance 300, Avance 400 or AM-500 MHz spectrometer (at the Ecole Nationale Supérieure de Chimie de Paris and at University of Caen). Chemical shifts are reported in ppm and coupling constants  $J$  in hertz. NMR spectra were calibrated using residual  $^1\text{H}$  and  $^{13}\text{C}$  resonances of deuterated solvents. The paramagnetic spectrum sequence was as followed: a  $\pi/6$  pulse followed by a 550 ms acquisition and a 2 s delay for a spectrum width of 220 ppm with 64 k points. After the FFT, a 0.3 Hz filter is applied. For the  $T_1$  measurements, the inversion-recovery sequence was used:  $\pi$  pulse, variable delay  $\tau$ ,  $\pi/2$  pulse and acquisition. The paramagnetic COSY 45 used an acquisition time of 32 ms and a delay of 1 s with TD1 = 512, TD2 = 2048 with an accumulation of 64 scans. UV-visible spectra were recorded on a Safas-Monaco spectrometer from 250 nm to 1000 nm with 2 nm steps. Molar conductivities of freshly prepared  $10^{-3}$  mol/L solutions of cobalt complexes in DMF were measured on a CDM 210 conductivity meter.

## Procedure for measuring the magnetic susceptibility by solution NMR

A solution with a known concentration  $C$  (expressed in  $\text{mol}\cdot\text{mL}^{-1}$ ) of the complex was freshly prepared (typically less than  $1.0\cdot 10^{-5}$   $\text{mol}\cdot\text{mL}^{-1}$ ). The tube with the complex to measure was locked and shimmed, the receiver gain was determined and a spectrum could be recorded. A tube with the pure solvent was then locked in the NMR magnet. Then, the analyzed tube was sent back in the magnet and the NMR spectrum was recorded. The residual peak solvent was shifted by  $\Delta\nu$ . At 293 K and for a 300 MHz spectrometer, the magnetic susceptibility (expressed in  $\mu_{\text{B}}$ ) follows the equation:

$$\mu_{\text{eff}} = 1,36 \cdot 10^{-3} \sqrt{\frac{\Delta\nu}{C}}$$

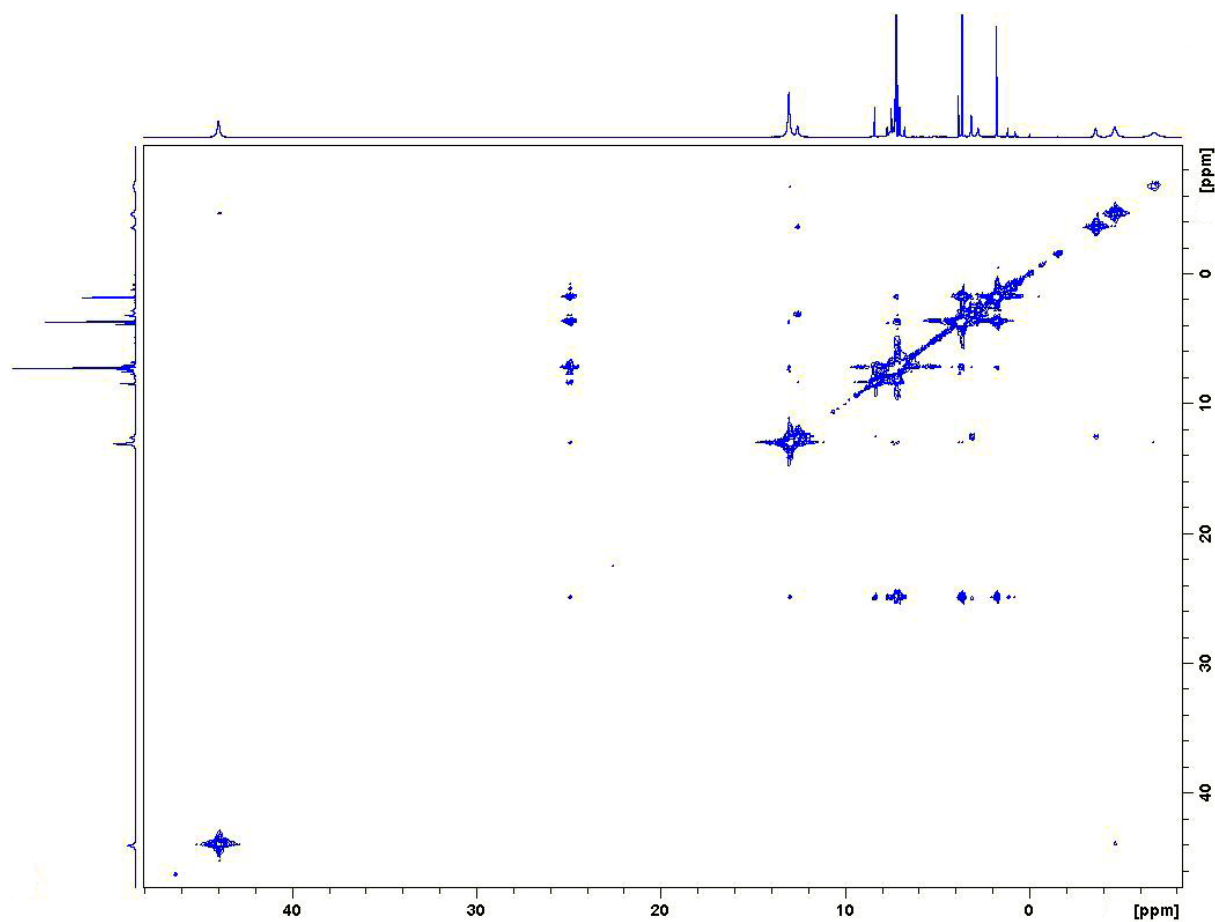

**Figure 1S.** 2D COSY NMR spectrum of complex **12** ( $\text{CDCl}_3$ ,  $25^\circ\text{C}$ , 400 MHz).

### Molar conductivities

$C = 10^{-3}$  mol/L in DMF,  $20^\circ\text{C}$ .

| Complex   | Color      | Conductivity $\mu\text{S}/\text{cm}$ |
|-----------|------------|--------------------------------------|
| <b>1</b>  | colorless  | 13.4                                 |
| <b>2</b>  | colorless  | 51.0                                 |
| <b>3</b>  | colorless  | 40.0                                 |
| <b>4</b>  | colorless  | 19.7                                 |
| <b>5</b>  | colorless  | 23.8                                 |
| <b>6</b>  | colorless  | 40.5                                 |
| <b>7</b>  | brown      | 37.8                                 |
| <b>9</b>  | green      | 37.5                                 |
| <b>10</b> | pale green | 114.5                                |
| <b>11</b> | blue       | 101.0                                |

### UV-vis spectrum of complex 7

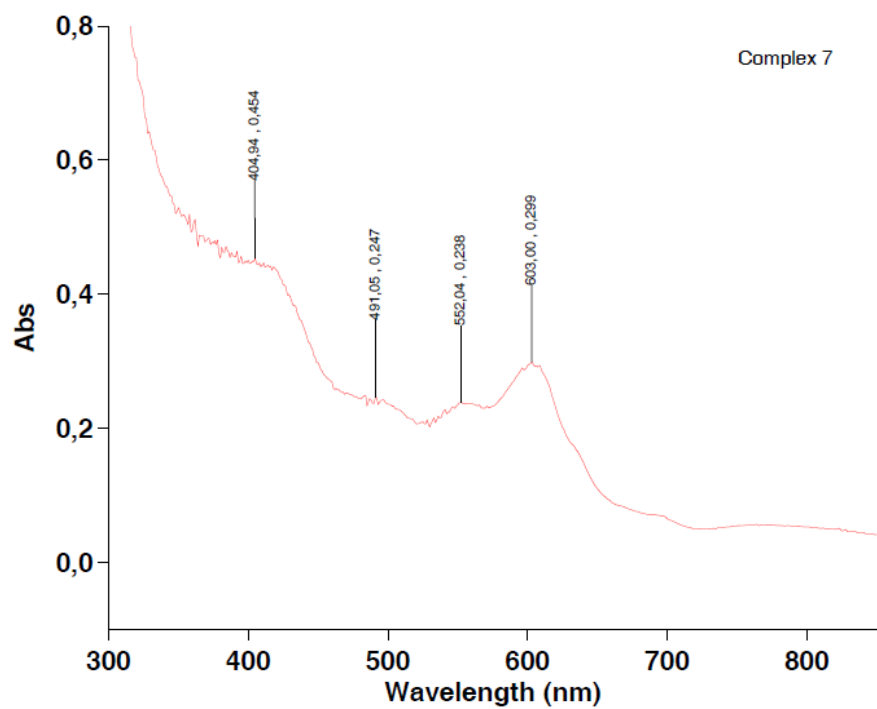

### UV-vis spectrum of complex 9

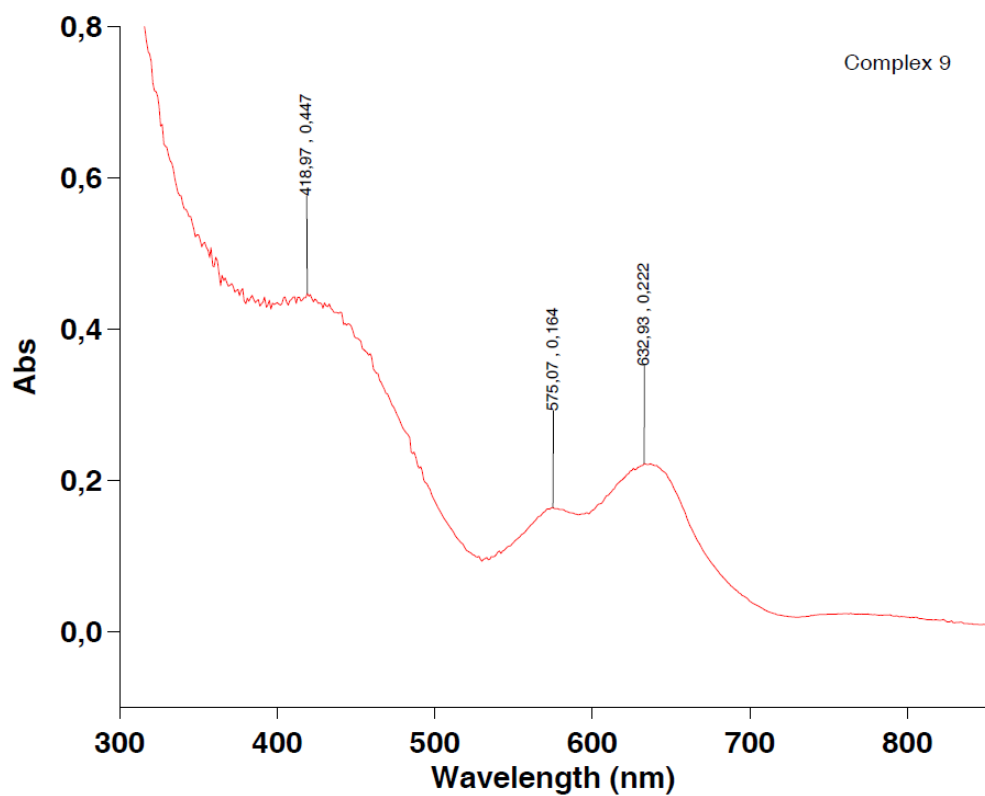

## UV-vis spectrum of complex 11

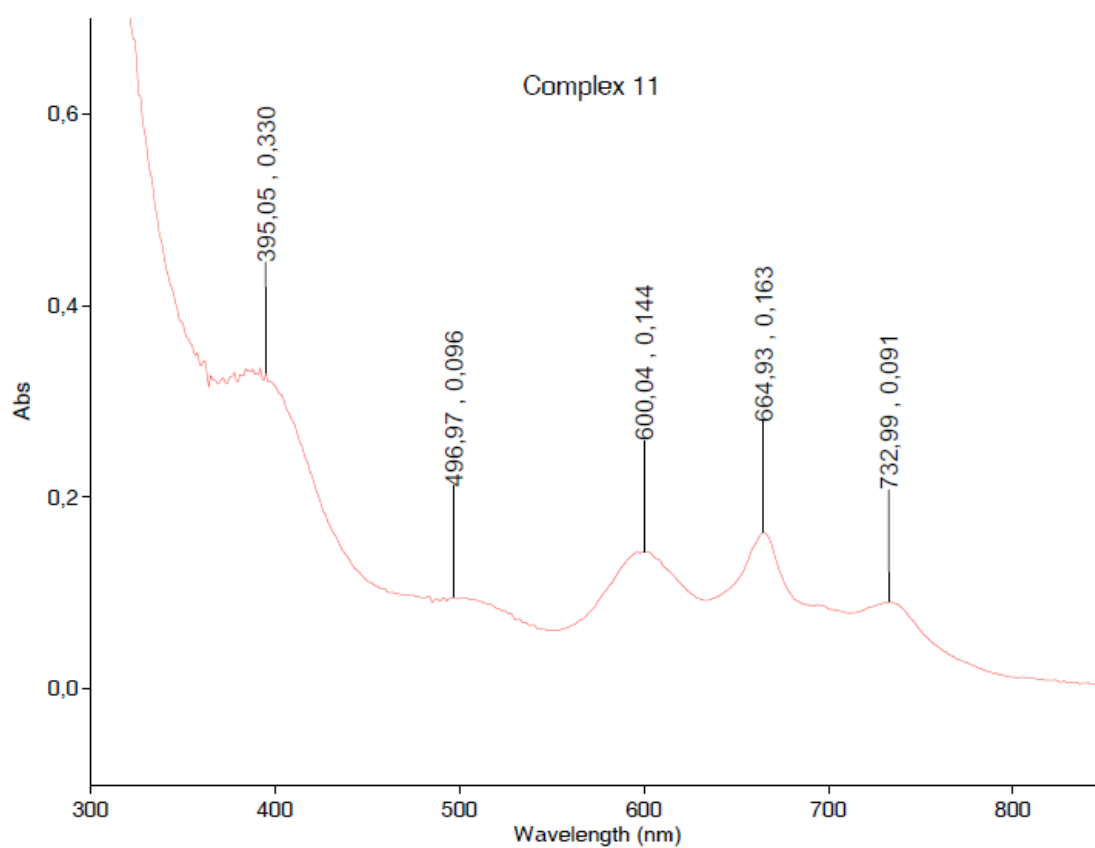

## [L<sup>1</sup>]H: Crystal structure report

### X-ray crystallographic study

(C<sub>27</sub> H<sub>35</sub> N<sub>3</sub> O); *M* = 417.58. APEXII, Bruker-AXS diffractometer, Mo-K $\alpha$  radiation ( $\lambda$  = 0.71073 Å), *T* = 100(2) K; monoclinic *P*2<sub>1</sub>/*n* (I.T.#14), *a* = 10.052(2), *b* = 24.616(6), *c* = 10.268(2) Å,  $\beta$  = 110.971(12) °, *V* = 2372.4(9) Å<sup>3</sup>, *Z* = 4, *d* = 1.169 g.cm<sup>-3</sup>,  $\mu$  = 0.071 mm<sup>-1</sup>. The structure was solved by direct methods using the *SIR97* program [1], and then refined with full-matrix least-square methods based on *F*<sup>2</sup> (*SHELXL-97*) [2] with the aid of the *WINGX* [3] program. All non-hydrogen atoms were refined with anisotropic atomic displacement parameters. H atoms were finally included in their calculated positions. A final refinement on *F*<sup>2</sup> with 5268 unique intensities and 282 parameters converged at  $\omega R(F^2)$  = 0.1496 (*R*(*F*) = 0.0672) for 3419 observed reflections with *I* > 2 $\sigma$ (*I*).

[1] A. Altomare, M. C. Burla, M. Camalli, G. Cascarano, C. Giacovazzo, A. Guagliardi, A. G. G. Moliterni, G. Polidori, R. Spagna, *J. Appl. Cryst.* (1999) 32, 115-119

[2] Sheldrick G.M., *Acta Cryst. A*64 (2008), 112-122

[3] L. J. Farrugia, *J. Appl. Cryst.*, 1999, 32, 837-838

### Structural data

|                                 |                                                                                                                                       |
|---------------------------------|---------------------------------------------------------------------------------------------------------------------------------------|
| Empirical formula               | C <sub>27</sub> H <sub>35</sub> N <sub>3</sub> O                                                                                      |
| Formula weight                  | 417.58                                                                                                                                |
| Temperature                     | 100(2) K                                                                                                                              |
| Wavelength                      | 0.71073 Å                                                                                                                             |
| Crystal system, space group     | monoclinic, <i>P</i> 2 <sub>1</sub> / <i>n</i>                                                                                        |
| Unit cell dimensions            | <i>a</i> = 10.052(2) Å, $\alpha$ = 90 °<br><i>b</i> = 24.616(6) Å, $\beta$ = 110.971(12) °<br><i>c</i> = 10.268(2) Å, $\gamma$ = 90 ° |
| Volume                          | 2372.4(9) Å <sup>3</sup>                                                                                                              |
| <i>Z</i> , Calculated density   | 4, 1.169 (g.cm <sup>-3</sup> )                                                                                                        |
| Absorption coefficient          | 0.071 mm <sup>-1</sup>                                                                                                                |
| <i>F</i> (000)                  | 904                                                                                                                                   |
| Crystal size                    | 0.55 x 0.5 x 0.43 mm                                                                                                                  |
| Crystal color                   | colorless                                                                                                                             |
| Theta range for data collection | 2.57 to 27.61 °                                                                                                                       |
| <i>h</i> _min, <i>h</i> _max    | -13, 11                                                                                                                               |
| <i>k</i> _min, <i>k</i> _max    | -32, 31                                                                                                                               |
| <i>l</i> _min, <i>l</i> _max    | -13, 12                                                                                                                               |
| Reflections collected / unique  | 17275 / 5268 [ <i>R</i> (int) = 0.069]                                                                                                |
| Completeness to theta_max       | 0.957                                                                                                                                 |
| Absorption correction type      | multi-scan                                                                                                                            |
| Max. and min. transmission      | 0.970, 0.952                                                                                                                          |
| Refinement method               | Full-matrix least-squares on <i>F</i> <sup>2</sup>                                                                                    |

Data / restraints / parameters 5268 / 0 / 282  
 Goodness-of-fit 1.013  
 Final R indices [I>2σ] R1<sup>a</sup> = 0.0672, wR2<sup>b</sup> = 0.1496  
 R indices (all data) R1<sup>a</sup> = 0.107, wR2<sup>b</sup> = 0.1663  
 Largest diff. peak and hole 0.28 and -0.262 e.Å<sup>-3</sup>

$$^aR1 = \sum | |F_o| - |F_c| | / \sum |F_o|$$

$$^b wR2 = \{ \sum [w(F_o^2 - F_c^2)^2] / \sum [w(F_o^2)^2] \}^{1/2}$$

Atomic coordinates, site occupancy (%) and equivalent isotropic displacement parameters (Å<sup>2</sup> x 10<sup>3</sup>). U(eq) is defined as one third of the trace of the orthogonalized U<sub>ij</sub> tensor.

| Atom | x            | y            | z            | occ. | U (eq)     |
|------|--------------|--------------|--------------|------|------------|
| N1   | 0.79856 (18) | 0.24382 (7)  | 0.96323 (18) | 1    | 0.0210 (4) |
| C1   | 0.7629 (2)   | 0.24212 (9)  | 1.0892 (2)   | 1    | 0.0249 (5) |
| H1A  | 0.7499       | 0.2798       | 1.1165       | 1    | 0.03       |
| H1B  | 0.8439       | 0.226        | 1.1658       | 1    | 0.03       |
| C2   | 0.6296 (2)   | 0.20982 (9)  | 1.0721 (2)   | 1    | 0.0246 (5) |
| C3   | 0.5201 (2)   | 0.20368 (9)  | 0.9442 (3)   | 1    | 0.0288 (5) |
| H3   | 0.5282       | 0.2185       | 0.8619       | 1    | 0.035      |
| C4   | 0.3991 (3)   | 0.17560 (10) | 0.9385 (3)   | 1    | 0.0362 (6) |
| H4   | 0.3226       | 0.1707       | 0.8522       | 1    | 0.043      |
| C5   | 0.3913 (3)   | 0.15477 (10) | 1.0603 (3)   | 1    | 0.0376 (6) |
| H5   | 0.3093       | 0.1355       | 1.0599       | 1    | 0.045      |
| C6   | 0.5055 (3)   | 0.16258 (10) | 1.1828 (3)   | 1    | 0.0359 (6) |
| H6   | 0.4995       | 0.148        | 1.2662       | 1    | 0.043      |
| N7   | 0.6241 (2)   | 0.18942 (8)  | 1.1918 (2)   | 1    | 0.0308 (5) |
| C11  | 0.8517 (2)   | 0.19051 (9)  | 0.9384 (2)   | 1    | 0.0240 (5) |
| H11A | 0.7853       | 0.1619       | 0.9455       | 1    | 0.029      |
| H11B | 0.9455       | 0.1836       | 1.0121       | 1    | 0.029      |
| C12  | 0.8668 (2)   | 0.18653 (8)  | 0.7974 (2)   | 1    | 0.0221 (5) |
| C13  | 0.9743 (3)   | 0.15542 (10) | 0.7801 (3)   | 1    | 0.0326 (6) |
| H13  | 1.0419       | 0.1376       | 0.8579       | 1    | 0.039      |
| C14  | 0.9826 (3)   | 0.15040 (10) | 0.6491 (3)   | 1    | 0.0387 (6) |
| H14  | 1.0548       | 0.1288       | 0.6352       | 1    | 0.046      |
| C15  | 0.8842 (3)   | 0.17737 (10) | 0.5391 (3)   | 1    | 0.0347 (6) |
| H15  | 0.8868       | 0.1748       | 0.4477       | 1    | 0.042      |
| C16  | 0.7818 (2)   | 0.20810 (10) | 0.5650 (3)   | 1    | 0.0324 (6) |
| H16  | 0.715        | 0.2271       | 0.4891       | 1    | 0.039      |
| N17  | 0.77089 (19) | 0.21283 (8)  | 0.6910 (2)   | 1    | 0.0287 (5) |
| C21  | 0.9094 (2)   | 0.28542 (8)  | 0.9792 (2)   | 1    | 0.0226 (5) |
| H21A | 0.942        | 0.2831       | 0.8991       | 1    | 0.027      |
| H21B | 0.9922       | 0.2778       | 1.0651       | 1    | 0.027      |
| C22  | 0.8560 (2)   | 0.34195 (8)  | 0.9872 (2)   | 1    | 0.0212 (5) |
| C23  | 0.9295 (2)   | 0.37562 (8)  | 1.0989 (2)   | 1    | 0.0225 (5) |
| H23  | 1.0125       | 0.3622       | 1.17         | 1    | 0.027      |
| C24  | 0.8845 (2)   | 0.42799 (9)  | 1.1087 (2)   | 1    | 0.0237 (5) |
| C24A | 0.9596 (2)   | 0.46593 (9)  | 1.2318 (2)   | 1    | 0.0267 (5) |
| C24B | 1.1003 (2)   | 0.44179 (10) | 1.3298 (3)   | 1    | 0.0313 (6) |
| H24A | 1.0818       | 0.4069       | 1.3659       | 1    | 0.047      |
| H24B | 1.1443       | 0.4668       | 1.4077       | 1    | 0.047      |

|      |              |              |              |   |            |
|------|--------------|--------------|--------------|---|------------|
| H24C | 1.1648       | 0.4363       | 1.2785       | 1 | 0.047      |
| C24C | 0.8608 (3)   | 0.47533 (11) | 1.3143 (3)   | 1 | 0.0380 (6) |
| H24D | 0.8403       | 0.4405       | 1.3493       | 1 | 0.057      |
| H24E | 0.7716       | 0.4918       | 1.2532       | 1 | 0.057      |
| H24F | 0.9076       | 0.4997       | 1.393        | 1 | 0.057      |
| C24D | 0.9924 (3)   | 0.52075 (10) | 1.1805 (3)   | 1 | 0.0405 (7) |
| H24G | 0.9038       | 0.5371       | 1.1177       | 1 | 0.061      |
| H24H | 1.0581       | 0.5155       | 1.1305       | 1 | 0.061      |
| H24I | 1.0363       | 0.5448       | 1.2605       | 1 | 0.061      |
| C25  | 0.7624 (2)   | 0.44591 (9)  | 0.9997 (2)   | 1 | 0.0236 (5) |
| H25  | 0.7295       | 0.4817       | 1.0055       | 1 | 0.028      |
| C26  | 0.6864 (2)   | 0.41482 (9)  | 0.8838 (2)   | 1 | 0.0216 (5) |
| C26A | 0.5592 (2)   | 0.43867 (8)  | 0.7636 (2)   | 1 | 0.0221 (5) |
| C26B | 0.5843 (2)   | 0.43383 (9)  | 0.6249 (2)   | 1 | 0.0278 (5) |
| H26A | 0.5023       | 0.4488       | 0.5494       | 1 | 0.042      |
| H26B | 0.5963       | 0.3955       | 0.6058       | 1 | 0.042      |
| H26C | 0.6704       | 0.4541       | 0.6312       | 1 | 0.042      |
| C26C | 0.5373 (2)   | 0.49923 (9)  | 0.7849 (3)   | 1 | 0.0281 (5) |
| H26D | 0.5207       | 0.5042       | 0.8726       | 1 | 0.042      |
| H26E | 0.4547       | 0.5126       | 0.7072       | 1 | 0.042      |
| H26F | 0.6224       | 0.5195       | 0.7887       | 1 | 0.042      |
| C26D | 0.4210 (2)   | 0.40862 (9)  | 0.7520 (2)   | 1 | 0.0274 (5) |
| H26G | 0.405        | 0.4117       | 0.8404       | 1 | 0.041      |
| H26H | 0.4295       | 0.3702       | 0.7311       | 1 | 0.041      |
| H26I | 0.3405       | 0.4248       | 0.677        | 1 | 0.041      |
| C27  | 0.7338 (2)   | 0.36121 (8)  | 0.8806 (2)   | 1 | 0.0203 (5) |
| O27  | 0.66058 (15) | 0.32764 (6)  | 0.77081 (16) | 1 | 0.0270 (4) |
| H27  | 0.6876       | 0.2954       | 0.791        | 1 | 0.04       |

**Anisotropic displacement parameters ( $\text{\AA}^2$ )**

The anisotropic displacement factor exponent takes the form:

$$-2\pi^2 [ h^2 a^{*2} U_{11} + \dots + 2 h k a^* b^* U_{12} ].$$

| Atom | U11         | U22         | U33         | U23          | U13         | U12          |
|------|-------------|-------------|-------------|--------------|-------------|--------------|
| N1   | 0.0216 (9)  | 0.0220 (9)  | 0.0209 (10) | 0.0001 (8)   | 0.0096 (8)  | -0.0004 (7)  |
| C1   | 0.0246 (11) | 0.0264 (12) | 0.0238 (12) | -0.0004 (9)  | 0.0087 (10) | -0.0001 (9)  |
| C2   | 0.0254 (11) | 0.0249 (11) | 0.0268 (13) | 0.0009 (10)  | 0.0134 (10) | 0.0029 (9)   |
| C3   | 0.0238 (11) | 0.0343 (13) | 0.0289 (13) | 0.0044 (10)  | 0.0102 (11) | 0.0009 (9)   |
| C4   | 0.0247 (12) | 0.0440 (15) | 0.0390 (16) | 0.0040 (12)  | 0.0103 (12) | -0.0009 (10) |
| C5   | 0.0324 (13) | 0.0393 (15) | 0.0501 (18) | -0.0019 (12) | 0.0259 (13) | -0.0063 (11) |
| C6   | 0.0452 (15) | 0.0298 (13) | 0.0428 (16) | 0.0020 (11)  | 0.0281 (14) | -0.0027 (11) |
| N7   | 0.0374 (11) | 0.0292 (11) | 0.0308 (12) | 0.0015 (9)   | 0.0182 (10) | -0.0002 (8)  |
| C11  | 0.0212 (10) | 0.0239 (11) | 0.0255 (12) | 0.0009 (9)   | 0.0066 (10) | 0.0014 (8)   |
| C12  | 0.0184 (10) | 0.0231 (11) | 0.0241 (12) | -0.0006 (9)  | 0.0067 (10) | -0.0015 (8)  |
| C13  | 0.0315 (12) | 0.0352 (14) | 0.0336 (14) | 0.0043 (11)  | 0.0148 (12) | 0.0089 (10)  |
| C14  | 0.0456 (15) | 0.0355 (14) | 0.0438 (17) | 0.0029 (12)  | 0.0268 (14) | 0.0126 (11)  |
| C15  | 0.0412 (14) | 0.0364 (14) | 0.0307 (14) | -0.0051 (11) | 0.0182 (12) | -0.0049 (11) |
| C16  | 0.0240 (11) | 0.0488 (16) | 0.0242 (13) | 0.0016 (11)  | 0.0086 (11) | -0.0007 (10) |

|      |             |             |             |              |             |              |
|------|-------------|-------------|-------------|--------------|-------------|--------------|
| N17  | 0.0209 (9)  | 0.0422 (12) | 0.0219 (11) | 0.0024 (9)   | 0.0063 (8)  | 0.0048 (8)   |
| C21  | 0.0164 (9)  | 0.0246 (11) | 0.0232 (12) | 0.0005 (9)   | 0.0025 (9)  | -0.0004 (8)  |
| C22  | 0.0178 (9)  | 0.0252 (11) | 0.0216 (12) | 0.0007 (9)   | 0.0083 (9)  | -0.0004 (8)  |
| C23  | 0.0184 (10) | 0.0273 (12) | 0.0223 (12) | 0.0002 (9)   | 0.0077 (10) | -0.0010 (8)  |
| C24  | 0.0198 (10) | 0.0275 (12) | 0.0255 (12) | -0.0015 (9)  | 0.0100 (10) | -0.0020 (8)  |
| C24A | 0.0224 (11) | 0.0285 (12) | 0.0266 (13) | -0.0029 (10) | 0.0056 (10) | 0.0018 (9)   |
| C24B | 0.0218 (11) | 0.0394 (14) | 0.0289 (13) | -0.0100 (11) | 0.0043 (11) | -0.0001 (10) |
| C24C | 0.0289 (12) | 0.0537 (17) | 0.0281 (14) | -0.0125 (12) | 0.0063 (12) | 0.0057 (11)  |
| C24D | 0.0414 (15) | 0.0334 (14) | 0.0359 (15) | -0.0072 (11) | 0.0008 (13) | -0.0091 (11) |
| C25  | 0.0214 (10) | 0.0242 (11) | 0.0267 (12) | -0.0026 (9)  | 0.0105 (10) | -0.0001 (8)  |
| C26  | 0.0174 (10) | 0.0269 (12) | 0.0214 (12) | 0.0010 (9)   | 0.0082 (9)  | -0.0008 (8)  |
| C26A | 0.0186 (10) | 0.0249 (11) | 0.0219 (12) | -0.0007 (9)  | 0.0061 (9)  | 0.0004 (8)   |
| C26B | 0.0220 (11) | 0.0299 (13) | 0.0303 (13) | 0.0017 (10)  | 0.0079 (10) | 0.0000 (9)   |
| C26C | 0.0231 (11) | 0.0282 (12) | 0.0300 (13) | 0.0016 (10)  | 0.0058 (11) | 0.0038 (9)   |
| C26D | 0.0201 (10) | 0.0329 (13) | 0.0272 (13) | 0.0018 (10)  | 0.0060 (10) | -0.0013 (9)  |
| C27  | 0.0178 (9)  | 0.0233 (11) | 0.0188 (11) | -0.0016 (9)  | 0.0051 (9)  | -0.0033 (8)  |
| O27  | 0.0242 (8)  | 0.0225 (8)  | 0.0274 (9)  | -0.0026 (7)  | 0.0010 (7)  | 0.0010 (6)   |

Bond lengths [Å]

|     |        |             |
|-----|--------|-------------|
| N1  | - C1   | = 1.461 (3) |
| N1  | - C11  | = 1.473 (3) |
| N1  | - C21  | = 1.479 (3) |
| C1  | - C2   | = 1.513 (3) |
| C1  | - H1A  | = 0.99      |
| C1  | - H1B  | = 0.99      |
| C2  | - N7   | = 1.346 (3) |
| C2  | - C3   | = 1.387 (3) |
| C3  | - C4   | = 1.382 (3) |
| C3  | - H3   | = 0.95      |
| C4  | - C5   | = 1.380 (4) |
| C4  | - H4   | = 0.95      |
| C5  | - C6   | = 1.380 (4) |
| C5  | - H5   | = 0.95      |
| C6  | - N7   | = 1.337 (3) |
| C6  | - H6   | = 0.95      |
| C11 | - C12  | = 1.512 (3) |
| C11 | - H11A | = 0.99      |
| C11 | - H11B | = 0.99      |
| C12 | - N17  | = 1.338 (3) |
| C12 | - C13  | = 1.387 (3) |
| C13 | - C14  | = 1.383 (3) |
| C13 | - H13  | = 0.95      |
| C14 | - C15  | = 1.377 (4) |
| C14 | - H14  | = 0.95      |
| C15 | - C16  | = 1.378 (3) |
| C15 | - H15  | = 0.95      |
| C16 | - N17  | = 1.342 (3) |
| C16 | - H16  | = 0.95      |
| C21 | - C22  | = 1.504 (3) |
| C21 | - H21A | = 0.99      |
| C21 | - H21B | = 0.99      |
| C22 | - C23  | = 1.393 (3) |



|      |   |      |   |           |
|------|---|------|---|-----------|
| C22  | - | C27  | = | 1.404 (3) |
| C23  | - | C24  | = | 1.382 (3) |
| C23  | - | H23  | = | 0.95      |
| C24  | - | C25  | = | 1.404 (3) |
| C24  | - | C24A | = | 1.535 (3) |
| C24A | - | C24D | = | 1.527 (3) |
| C24A | - | C24B | = | 1.532 (3) |
| C24A | - | C24C | = | 1.535 (3) |
| C24B | - | H24A | = | 0.98      |
| C24B | - | H24B | = | 0.98      |
| C24B | - | H24C | = | 0.98      |
| C24C | - | H24D | = | 0.98      |
| C24C | - | H24E | = | 0.98      |
| C24C | - | H24F | = | 0.98      |
| C24D | - | H24G | = | 0.98      |
| C24D | - | H24H | = | 0.98      |
| C24D | - | H24I | = | 0.98      |
| C25  | - | C26  | = | 1.391 (3) |
| C25  | - | H25  | = | 0.95      |
| C26  | - | C27  | = | 1.407 (3) |
| C26  | - | C26A | = | 1.541 (3) |
| C26A | - | C26C | = | 1.534 (3) |
| C26A | - | C26B | = | 1.537 (3) |
| C26A | - | C26D | = | 1.541 (3) |
| C26B | - | H26A | = | 0.98      |
| C26B | - | H26B | = | 0.98      |
| C26B | - | H26C | = | 0.98      |
| C26C | - | H26D | = | 0.98      |
| C26C | - | H26E | = | 0.98      |
| C26C | - | H26F | = | 0.98      |
| C26D | - | H26G | = | 0.98      |
| C26D | - | H26H | = | 0.98      |
| C26D | - | H26I | = | 0.98      |
| C27  | - | O27  | = | 1.379 (2) |
| O27  | - | H27  | = | 0.84      |

Angles [°]

|     |   |    |   |     |   |             |
|-----|---|----|---|-----|---|-------------|
| C1  | - | N1 | - | C11 | = | 110.28 (17) |
| C1  | - | N1 | - | C21 | = | 109.59 (17) |
| C11 | - | N1 | - | C21 | = | 109.32 (17) |
| N1  | - | C1 | - | C2  | = | 113.57 (18) |
| N1  | - | C1 | - | H1A | = | 108.9       |
| C2  | - | C1 | - | H1A | = | 108.9       |
| N1  | - | C1 | - | H1B | = | 108.9       |
| C2  | - | C1 | - | H1B | = | 108.9       |
| H1A | - | C1 | - | H1B | = | 107.7       |
| N7  | - | C2 | - | C3  | = | 123.0 (2)   |
| N7  | - | C2 | - | C1  | = | 114.5 (2)   |
| C3  | - | C2 | - | C1  | = | 122.4 (2)   |
| C4  | - | C3 | - | C2  | = | 118.9 (2)   |

|      |        |        |               |
|------|--------|--------|---------------|
| C4   | - C3   | - H3   | = 120.6       |
| C2   | - C3   | - H3   | = 120.6       |
| C5   | - C4   | - C3   | = 118.8 (2)   |
| C5   | - C4   | - H4   | = 120.6       |
| C3   | - C4   | - H4   | = 120.6       |
| C6   | - C5   | - C4   | = 118.4 (2)   |
| C6   | - C5   | - H5   | = 120.8       |
| C4   | - C5   | - H5   | = 120.8       |
| N7   | - C6   | - C5   | = 124.2 (2)   |
| N7   | - C6   | - H6   | = 117.9       |
| C5   | - C6   | - H6   | = 117.9       |
| C6   | - N7   | - C2   | = 116.6 (2)   |
| N1   | - C11  | - C12  | = 112.98 (18) |
| N1   | - C11  | - H11A | = 109         |
| C12  | - C11  | - H11A | = 109         |
| N1   | - C11  | - H11B | = 109         |
| C12  | - C11  | - H11B | = 109         |
| H11A | - C11  | - H11B | = 107.8       |
| N17  | - C12  | - C13  | = 122.0 (2)   |
| N17  | - C12  | - C11  | = 117.40 (19) |
| C13  | - C12  | - C11  | = 120.6 (2)   |
| C14  | - C13  | - C12  | = 119.7 (2)   |
| C14  | - C13  | - H13  | = 120.2       |
| C12  | - C13  | - H13  | = 120.2       |
| C15  | - C14  | - C13  | = 118.6 (2)   |
| C15  | - C14  | - H14  | = 120.7       |
| C13  | - C14  | - H14  | = 120.7       |
| C16  | - C15  | - C14  | = 118.2 (2)   |
| C16  | - C15  | - H15  | = 120.9       |
| C14  | - C15  | - H15  | = 120.9       |
| N17  | - C16  | - C15  | = 124.0 (2)   |
| N17  | - C16  | - H16  | = 118         |
| C15  | - C16  | - H16  | = 118         |
| C12  | - N17  | - C16  | = 117.5 (2)   |
| N1   | - C21  | - C22  | = 112.18 (17) |
| N1   | - C21  | - H21A | = 109.2       |
| C22  | - C21  | - H21A | = 109.2       |
| N1   | - C21  | - H21B | = 109.2       |
| C22  | - C21  | - H21B | = 109.2       |
| H21A | - C21  | - H21B | = 107.9       |
| C23  | - C22  | - C27  | = 119.93 (19) |
| C23  | - C22  | - C21  | = 120.06 (18) |
| C27  | - C22  | - C21  | = 120.00 (19) |
| C24  | - C23  | - C22  | = 121.6 (2)   |
| C24  | - C23  | - H23  | = 119.2       |
| C22  | - C23  | - H23  | = 119.2       |
| C23  | - C24  | - C25  | = 116.8 (2)   |
| C23  | - C24  | - C24A | = 123.4 (2)   |
| C25  | - C24  | - C24A | = 119.83 (19) |
| C24D | - C24A | - C24B | = 107.9 (2)   |
| C24D | - C24A | - C24C | = 108.6 (2)   |
| C24B | - C24A | - C24C | = 108.9 (2)   |
| C24D | - C24A | - C24  | = 110.88 (19) |
| C24B | - C24A | - C24  | = 111.78 (18) |
| C24C | - C24A | - C24  | = 108.76 (18) |
| C24A | - C24B | - H24A | = 109.5       |
| C24A | - C24B | - H24B | = 109.5       |
| H24A | - C24B | - H24B | = 109.5       |

|      |   |      |   |      |   |             |
|------|---|------|---|------|---|-------------|
| C24A | - | C24B | - | H24C | = | 109.5       |
| H24A | - | C24B | - | H24C | = | 109.5       |
| H24B | - | C24B | - | H24C | = | 109.5       |
| C24A | - | C24C | - | H24D | = | 109.5       |
| C24A | - | C24C | - | H24E | = | 109.5       |
| H24D | - | C24C | - | H24E | = | 109.5       |
| C24A | - | C24C | - | H24F | = | 109.5       |
| H24D | - | C24C | - | H24F | = | 109.5       |
| H24E | - | C24C | - | H24F | = | 109.5       |
| C24A | - | C24D | - | H24G | = | 109.5       |
| C24A | - | C24D | - | H24H | = | 109.5       |
| H24G | - | C24D | - | H24H | = | 109.5       |
| C24A | - | C24D | - | H24I | = | 109.5       |
| H24G | - | C24D | - | H24I | = | 109.5       |
| H24H | - | C24D | - | H24I | = | 109.5       |
| C26  | - | C25  | - | C24  | = | 124.4 (2)   |
| C26  | - | C25  | - | H25  | = | 117.8       |
| C24  | - | C25  | - | H25  | = | 117.8       |
| C25  | - | C26  | - | C27  | = | 116.68 (19) |
| C25  | - | C26  | - | C26A | = | 121.36 (19) |
| C27  | - | C26  | - | C26A | = | 121.94 (19) |
| C26C | - | C26A | - | C26B | = | 106.71 (18) |
| C26C | - | C26A | - | C26D | = | 107.81 (18) |
| C26B | - | C26A | - | C26D | = | 109.50 (18) |
| C26C | - | C26A | - | C26  | = | 112.08 (17) |
| C26B | - | C26A | - | C26  | = | 110.41 (17) |
| C26D | - | C26A | - | C26  | = | 110.22 (18) |
| C26A | - | C26B | - | H26A | = | 109.5       |
| C26A | - | C26B | - | H26B | = | 109.5       |
| H26A | - | C26B | - | H26B | = | 109.5       |
| C26A | - | C26B | - | H26C | = | 109.5       |
| H26A | - | C26B | - | H26C | = | 109.5       |
| H26B | - | C26B | - | H26C | = | 109.5       |
| C26A | - | C26C | - | H26D | = | 109.5       |
| C26A | - | C26C | - | H26E | = | 109.5       |
| H26D | - | C26C | - | H26E | = | 109.5       |
| C26A | - | C26C | - | H26F | = | 109.5       |
| H26D | - | C26C | - | H26F | = | 109.5       |
| H26E | - | C26C | - | H26F | = | 109.5       |
| C26A | - | C26D | - | H26G | = | 109.5       |
| C26A | - | C26D | - | H26H | = | 109.5       |
| H26G | - | C26D | - | H26H | = | 109.5       |
| C26A | - | C26D | - | H26I | = | 109.5       |
| H26G | - | C26D | - | H26I | = | 109.5       |
| H26H | - | C26D | - | H26I | = | 109.5       |
| O27  | - | C27  | - | C22  | = | 119.81 (18) |
| O27  | - | C27  | - | C26  | = | 119.67 (18) |
| C22  | - | C27  | - | C26  | = | 120.51 (19) |
| C27  | - | O27  | - | H27  | = | 109.5       |

Torsion angles [°]

|     |   |    |   |    |   |    |   |           |
|-----|---|----|---|----|---|----|---|-----------|
| C11 | - | N1 | - | C1 | - | C2 | = | -72.0 (2) |
|-----|---|----|---|----|---|----|---|-----------|

|      |       |        |        |                |
|------|-------|--------|--------|----------------|
| C21  | - N1  | - C1   | - C2   | = 167.65 (17)  |
| N1   | - C1  | - C2   | - N7   | = 154.96 (19)  |
| N1   | - C1  | - C2   | - C3   | = -27.4 (3)    |
| N7   | - C2  | - C3   | - C4   | = 0.3 (3)      |
| C1   | - C2  | - C3   | - C4   | = -177.1 (2)   |
| C2   | - C3  | - C4   | - C5   | = 0.1 (4)      |
| C3   | - C4  | - C5   | - C6   | = -0.4 (4)     |
| C4   | - C5  | - C6   | - N7   | = 0.3 (4)      |
| C5   | - C6  | - N7   | - C2   | = 0.2 (4)      |
| C3   | - C2  | - N7   | - C6   | = -0.5 (3)     |
| C1   | - C2  | - N7   | - C6   | = 177.1 (2)    |
| C1   | - N1  | - C11  | - C12  | = 170.23 (17)  |
| C21  | - N1  | - C11  | - C12  | = -69.2 (2)    |
| N1   | - C11 | - C12  | - N17  | = -35.0 (3)    |
| N1   | - C11 | - C12  | - C13  | = 146.8 (2)    |
| N17  | - C12 | - C13  | - C14  | = -1.0 (4)     |
| C11  | - C12 | - C13  | - C14  | = 177.2 (2)    |
| C12  | - C13 | - C14  | - C15  | = 1.0 (4)      |
| C13  | - C14 | - C15  | - C16  | = -0.1 (4)     |
| C14  | - C15 | - C16  | - N17  | = -0.9 (4)     |
| C13  | - C12 | - N17  | - C16  | = 0.1 (3)      |
| C11  | - C12 | - N17  | - C16  | = -178.2 (2)   |
| C15  | - C16 | - N17  | - C12  | = 0.9 (4)      |
| C1   | - N1  | - C21  | - C22  | = -66.1 (2)    |
| C11  | - N1  | - C21  | - C22  | = 172.93 (18)  |
| N1   | - C21 | - C22  | - C23  | = 126.0 (2)    |
| N1   | - C21 | - C22  | - C27  | = -55.3 (3)    |
| C27  | - C22 | - C23  | - C24  | = 0.5 (3)      |
| C21  | - C22 | - C23  | - C24  | = 179.2 (2)    |
| C22  | - C23 | - C24  | - C25  | = -0.9 (3)     |
| C22  | - C23 | - C24  | - C24A | = 178.2 (2)    |
| C23  | - C24 | - C24A | - C24D | = 128.6 (2)    |
| C25  | - C24 | - C24A | - C24D | = -52.4 (3)    |
| C23  | - C24 | - C24A | - C24B | = 8.2 (3)      |
| C25  | - C24 | - C24A | - C24B | = -172.8 (2)   |
| C23  | - C24 | - C24A | - C24C | = -112.1 (2)   |
| C25  | - C24 | - C24A | - C24C | = 67.0 (3)     |
| C23  | - C24 | - C25  | - C26  | = -0.7 (3)     |
| C24A | - C24 | - C25  | - C26  | = -179.8 (2)   |
| C24  | - C25 | - C26  | - C27  | = 2.6 (3)      |
| C24  | - C25 | - C26  | - C26A | = -175.8 (2)   |
| C25  | - C26 | - C26A | - C26C | = 3.8 (3)      |
| C27  | - C26 | - C26A | - C26C | = -174.5 (2)   |
| C25  | - C26 | - C26A | - C26B | = 122.6 (2)    |
| C27  | - C26 | - C26A | - C26B | = -55.7 (3)    |
| C25  | - C26 | - C26A | - C26D | = -116.3 (2)   |
| C27  | - C26 | - C26A | - C26D | = 65.4 (3)     |
| C23  | - C22 | - C27  | - O27  | = -179.45 (18) |
| C21  | - C22 | - C27  | - O27  | = 1.8 (3)      |
| C23  | - C22 | - C27  | - C26  | = 1.5 (3)      |
| C21  | - C22 | - C27  | - C26  | = -177.2 (2)   |
| C25  | - C26 | - C27  | - O27  | = 178.02 (19)  |
| C26A | - C26 | - C27  | - O27  | = -3.6 (3)     |
| C25  | - C26 | - C27  | - C22  | = -2.9 (3)     |
| C26A | - C26 | - C27  | - C22  | = 175.5 (2)    |

## [L<sup>2</sup>]H: Crystal structure report

### X-ray crystallographic study

(C<sub>39</sub> H<sub>35</sub> N<sub>3</sub> O);  $M = 561.7$ . APEXII, Bruker-AXS diffractometer, Mo-K $\alpha$  radiation ( $\lambda = 0.71073 \text{ \AA}$ ),  $T = 100(2) \text{ K}$ ; triclinic  $P-1$  (I.T.#2),  $a = 10.9042(6)$ ,  $b = 13.0721(6)$ ,  $c = 14.7332(7) \text{ \AA}$ ,  $\alpha = 112.417(2)$ ,  $\beta = 91.203(2)$ ,  $\gamma = 104.786(2)^\circ$ ,  $V = 1860.58(16) \text{ \AA}^3$ ,  $Z = 2$ ,  $d = 1.003 \text{ g.cm}^{-3}$ ,  $\mu = 0.060 \text{ mm}^{-1}$ . The structure was solved by direct methods using the *SIR97* program [1], and then refined with full-matrix least-square methods based on  $F^2$  (*SHELXL-97*) [2] with the aid of the *WINGX* [3] program. The contribution of the disordered solvents to the calculated structure factors was estimated following the *BYPASS* algorithm [4], implemented as the *SQUEEZE* option in *PLATON* [5]. A new data set, free of solvent contribution, was then used in the final refinement. All non-hydrogen atoms were refined with anisotropic atomic displacement parameters. H atoms were finally included in their calculated positions. A final refinement on  $F^2$  with 8390 unique intensities and 391 parameters converged at  $\omega R(F^2) = 0.1518$  ( $R(F) = 0.0524$ ) for 5717 observed reflections with  $I > 2\sigma(I)$ .

[1] A. Altomare, M. C. Burla, M. Camalli, G. Casciarano, C. Giacovazzo, A. Guagliardi, A. G. G. Moliterni, G. Polidori, R. Spagna, *J. Appl. Cryst.* (1999) 32, 115-119

[2] Sheldrick G.M., *Acta Cryst.* A64 (2008), 112-122

[3] L. J. Farrugia, *J. Appl. Cryst.*, 1999, 32, 837-838

[4] P. v.d. Sluis and A.L. Spek, *Acta Cryst.* (1990) A46, 194-201

[5] A. L. Spek, *J. Appl. Cryst.* (2003), 36, 7-13

### Structural data

|                                 |                                                                                                                                                                                      |
|---------------------------------|--------------------------------------------------------------------------------------------------------------------------------------------------------------------------------------|
| Empirical formula               | C <sub>39</sub> H <sub>35</sub> N <sub>3</sub> O                                                                                                                                     |
| Formula weight                  | 561.7                                                                                                                                                                                |
| Temperature                     | 100(2) K                                                                                                                                                                             |
| Wavelength                      | 0.71073 Å                                                                                                                                                                            |
| Crystal system, space group     | triclinic, $P -1$                                                                                                                                                                    |
| Unit cell dimensions            | $a = 10.9042(6) \text{ \AA}$ , $\alpha = 112.417(2)^\circ$<br>$b = 13.0721(6) \text{ \AA}$ , $\beta = 91.203(2)^\circ$<br>$c = 14.7332(7) \text{ \AA}$ , $\gamma = 104.786(2)^\circ$ |
| Volume                          | 1860.58(16) Å <sup>3</sup>                                                                                                                                                           |
| $Z$ , Calculated density        | 2, 1.003 (g.cm <sup>-3</sup> )                                                                                                                                                       |
| Absorption coefficient          | 0.060 mm <sup>-1</sup>                                                                                                                                                               |
| $F(000)$                        | 596                                                                                                                                                                                  |
| Crystal size                    | 0.55 x 0.32 x 0.18 mm                                                                                                                                                                |
| Crystal color                   | colorless                                                                                                                                                                            |
| Theta range for data collection | 1.76 to 27.57 °                                                                                                                                                                      |

```

h_min, h_max          -14 , 14
k_min, k_max          -16 , 16
l_min, l_max          -19 , 19
Reflections collected / unique    34702 / 8390 [R(int) = 0.0481]
Completeness to theta_max        0.975
Absorption correction type        multi-scan
Max. and min. transmission        0.989 , 0.958
Refinement method              Full-matrix least-squares on F2
Data / restraints / parameters    8390 / 0 / 391
Goodness-of-fit                1.093
Final R indices [I>2σ]          R1a = 0.0524, wR2b = 0.1518
R indices (all data)            R1a = 0.0744, wR2b = 0.1591
Largest diff. peak and hole      0.243 and -0.235 e.Å-3
    
```

$$^aR1 = \sum | |F_o| - |F_c| | / \sum |F_o|$$

$$^b wR2 = \{ \sum [w(F_o^2 - F_c^2)^2] / \sum [w(F_o^2)^2] \}^{1/2}$$

Atomic coordinates, site occupancy (%) and equivalent isotropic displacement parameters (Å<sup>2</sup> × 10<sup>3</sup>). U(eq) is defined as one third of the trace of the orthogonalized U<sub>ij</sub> tensor.

| Atom | x             | y            | z             | occ. | U (eq)     |
|------|---------------|--------------|---------------|------|------------|
| C1   | 0.21219 (13)  | 0.50520 (11) | 0.15735 (10)  | 1    | 0.0194 (3) |
| C2   | 0.13186 (13)  | 0.37724 (11) | 0.10359 (10)  | 1    | 0.0197 (3) |
| C3   | 0.09920 (14)  | 0.32248 (11) | 0.00111 (10)  | 1    | 0.0214 (3) |
| H3   | 0.1294        | 0.3651       | -0.0377       | 1    | 0.026      |
| C4   | 0.02462 (14)  | 0.20855 (11) | -0.04731 (11) | 1    | 0.0236 (3) |
| C5   | -0.02193 (15) | 0.14822 (12) | 0.01033 (11)  | 1    | 0.0262 (3) |
| H5   | -0.0736       | 0.0705       | -0.0212       | 1    | 0.031      |
| C6   | 0.00501 (14)  | 0.19844 (11) | 0.11243 (11)  | 1    | 0.0240 (3) |
| C7   | 0.08157 (14)  | 0.31360 (11) | 0.16021 (11)  | 1    | 0.0214 (3) |
| O7   | 0.11004 (10)  | 0.36560 (8)  | 0.26025 (7)   | 1    | 0.0241 (2) |
| H7   | 0.0707        | 0.321        | 0.2854        | 1    | 0.036      |
| C8   | -0.00320 (17) | 0.15294 (13) | -0.15831 (11) | 1    | 0.0312 (4) |
| H8A  | 0.0625        | 0.115        | -0.1853       | 1    | 0.047      |
| H8B  | -0.0029       | 0.212        | -0.184        | 1    | 0.047      |
| H8C  | -0.0873       | 0.0955       | -0.1781       | 1    | 0.047      |
| C9   | -0.04381 (16) | 0.12887 (12) | 0.17259 (11)  | 1    | 0.0301 (4) |
| H9A  | -0.1139       | 0.0598       | 0.1311        | 1    | 0.036      |
| H9B  | 0.0261        | 0.102        | 0.1911        | 1    | 0.036      |
| C11  | 0.25248 (13)  | 0.55800 (11) | 0.08060 (10)  | 1    | 0.0189 (3) |
| C12  | 0.33488 (14)  | 0.51413 (12) | 0.01495 (11)  | 1    | 0.0224 (3) |
| H12  | 0.3652        | 0.4538       | 0.019         | 1    | 0.027      |
| C13  | 0.37354 (15)  | 0.55653 (13) | -0.05614 (11) | 1    | 0.0256 (3) |
| H13  | 0.428         | 0.5241       | -0.1011       | 1    | 0.031      |
| C14  | 0.33235 (14)  | 0.64656 (13) | -0.06132 (12) | 1    | 0.0277 (4) |
| H14  | 0.3587        | 0.6764       | -0.1096       | 1    | 0.033      |
| C15  | 0.25300 (15)  | 0.69218 (12) | 0.00422 (11)  | 1    | 0.0268 (4) |
| H15  | 0.2257        | 0.7545       | 0.0015        | 1    | 0.032      |
| C16  | 0.21222 (14)  | 0.64815 (11) | 0.07442 (11)  | 1    | 0.0227 (3) |
| H16  | 0.1565        | 0.68         | 0.1184        | 1    | 0.027      |
| C21  | 0.33951 (14)  | 0.51773 (12) | 0.21451 (10)  | 1    | 0.0210 (3) |

|      |               |              |              |   |            |
|------|---------------|--------------|--------------|---|------------|
| C22  | 0.37367 (15)  | 0.42516 (12) | 0.22268 (11) | 1 | 0.0242 (3) |
| H22  | 0.3164        | 0.3496       | 0.1922       | 1 | 0.029      |
| C23  | 0.48969 (16)  | 0.44190 (15) | 0.27445 (12) | 1 | 0.0324 (4) |
| H23  | 0.51          | 0.3781       | 0.2804       | 1 | 0.039      |
| C24  | 0.57671 (17)  | 0.55130 (16) | 0.31776 (12) | 1 | 0.0366 (4) |
| H24  | 0.6557        | 0.5628       | 0.354        | 1 | 0.044      |
| C25  | 0.54626 (16)  | 0.64304 (15) | 0.30717 (12) | 1 | 0.0347 (4) |
| H25  | 0.6056        | 0.7178       | 0.3347       | 1 | 0.042      |
| C26  | 0.42962 (15)  | 0.62592 (13) | 0.25665 (11) | 1 | 0.0268 (3) |
| H26  | 0.4101        | 0.6899       | 0.2504       | 1 | 0.032      |
| C31  | 0.12603 (14)  | 0.56925 (11) | 0.22622 (10) | 1 | 0.0204 (3) |
| C32  | 0.16751 (16)  | 0.64833 (13) | 0.32308 (11) | 1 | 0.0271 (3) |
| H32  | 0.2528        | 0.6635       | 0.3512       | 1 | 0.032      |
| C33  | 0.08657 (17)  | 0.70595 (14) | 0.38003 (12) | 1 | 0.0343 (4) |
| H33  | 0.1176        | 0.7608       | 0.4459       | 1 | 0.041      |
| C34  | -0.03828 (17) | 0.68393 (13) | 0.34148 (12) | 1 | 0.0318 (4) |
| H34  | -0.0937       | 0.7227       | 0.3806       | 1 | 0.038      |
| C35  | -0.08136 (16) | 0.60519 (13) | 0.24572 (12) | 1 | 0.0288 (4) |
| H35  | -0.1672       | 0.5895       | 0.2185       | 1 | 0.035      |
| C36  | -0.00067 (14) | 0.54848 (12) | 0.18850 (11) | 1 | 0.0231 (3) |
| H36  | -0.0321       | 0.4945       | 0.1224       | 1 | 0.028      |
| N41  | -0.09087 (12) | 0.19459 (10) | 0.26282 (9)  | 1 | 0.0256 (3) |
| C51  | -0.10986 (16) | 0.13267 (12) | 0.32884 (12) | 1 | 0.0298 (4) |
| H51A | -0.1618       | 0.0519       | 0.2908       | 1 | 0.036      |
| H51B | -0.1575       | 0.1695       | 0.3824       | 1 | 0.036      |
| C52  | 0.01612 (16)  | 0.13334 (12) | 0.37379 (11) | 1 | 0.0277 (4) |
| C53  | 0.02710 (18)  | 0.03996 (13) | 0.39384 (12) | 1 | 0.0341 (4) |
| H53  | -0.0448       | -0.0254      | 0.3794       | 1 | 0.041      |
| C54  | 0.14339 (19)  | 0.04353 (14) | 0.43483 (13) | 1 | 0.0396 (4) |
| H54  | 0.1528        | -0.0192      | 0.4493       | 1 | 0.048      |
| C55  | 0.24628 (18)  | 0.13936 (14) | 0.45465 (13) | 1 | 0.0390 (4) |
| H55  | 0.3281        | 0.1439       | 0.4821       | 1 | 0.047      |
| C56  | 0.22660 (18)  | 0.22845 (14) | 0.43329 (15) | 1 | 0.0421 (5) |
| H56  | 0.2968        | 0.2952       | 0.4479       | 1 | 0.051      |
| N57  | 0.11435 (14)  | 0.22614 (11) | 0.39320 (11) | 1 | 0.0380 (4) |
| C61  | -0.20686 (16) | 0.22286 (13) | 0.24045 (12) | 1 | 0.0303 (4) |
| H61A | -0.2791       | 0.1515       | 0.2118       | 1 | 0.036      |
| H61B | -0.1929       | 0.2576       | 0.1911       | 1 | 0.036      |
| C62  | -0.23921 (15) | 0.30663 (12) | 0.33392 (11) | 1 | 0.0255 (3) |
| C63  | -0.15426 (16) | 0.41514 (12) | 0.38589 (12) | 1 | 0.0281 (4) |
| H63  | -0.0779       | 0.4399       | 0.3607       | 1 | 0.034      |
| C64  | -0.18225 (17) | 0.48668 (13) | 0.47466 (12) | 1 | 0.0328 (4) |
| H64  | -0.1254       | 0.5612       | 0.5117       | 1 | 0.039      |
| C65  | -0.29480 (17) | 0.44759 (14) | 0.50860 (12) | 1 | 0.0345 (4) |
| H65  | -0.3158       | 0.4941       | 0.5701       | 1 | 0.041      |
| C66  | -0.37566 (17) | 0.34007 (15) | 0.45144 (12) | 1 | 0.0342 (4) |
| H66  | -0.4541       | 0.3149       | 0.474        | 1 | 0.041      |
| N67  | -0.34960 (13) | 0.26912 (11) | 0.36562 (10) | 1 | 0.0322 (3) |

Anisotropic displacement parameters ( $\text{\AA}^2$ )

The anisotropic displacement factor exponent takes the form:

$$-2\pi^2 [ h^2 a^{*2} U_{11} + \dots + 2 h k a^* b^* U_{12} ].$$

| Atom | U11         | U22         | U33         | U23        | U13         | U12        |
|------|-------------|-------------|-------------|------------|-------------|------------|
| C1   | 0.0220 (8)  | 0.0177 (6)  | 0.0199 (8)  | 0.0084 (6) | 0.0034 (6)  | 0.0066 (5) |
| C2   | 0.0212 (8)  | 0.0186 (6)  | 0.0213 (8)  | 0.0081 (6) | 0.0055 (6)  | 0.0082 (5) |
| C3   | 0.0240 (8)  | 0.0213 (6)  | 0.0215 (8)  | 0.0088 (6) | 0.0051 (6)  | 0.0100 (6) |
| C4   | 0.0270 (9)  | 0.0231 (7)  | 0.0215 (8)  | 0.0068 (6) | 0.0044 (6)  | 0.0116 (6) |
| C5   | 0.0274 (9)  | 0.0195 (6)  | 0.0258 (9)  | 0.0036 (6) | 0.0067 (7)  | 0.0055 (6) |
| C6   | 0.0284 (9)  | 0.0193 (6)  | 0.0235 (8)  | 0.0072 (6) | 0.0083 (7)  | 0.0071 (6) |
| C7   | 0.0255 (8)  | 0.0193 (6)  | 0.0197 (8)  | 0.0063 (6) | 0.0067 (6)  | 0.0090 (6) |
| O7   | 0.0333 (6)  | 0.0189 (5)  | 0.0184 (6)  | 0.0080 (4) | 0.0063 (5)  | 0.0034 (4) |
| C8   | 0.0428 (10) | 0.0244 (7)  | 0.0223 (9)  | 0.0045 (6) | 0.0018 (7)  | 0.0106 (7) |
| C9   | 0.0410 (10) | 0.0191 (7)  | 0.0279 (9)  | 0.0077 (6) | 0.0134 (7)  | 0.0068 (6) |
| C11  | 0.0191 (8)  | 0.0194 (6)  | 0.0171 (7)  | 0.0074 (6) | -0.0008 (6) | 0.0038 (5) |
| C12  | 0.0240 (8)  | 0.0244 (7)  | 0.0207 (8)  | 0.0099 (6) | 0.0032 (6)  | 0.0087 (6) |
| C13  | 0.0229 (8)  | 0.0321 (7)  | 0.0237 (8)  | 0.0121 (7) | 0.0053 (6)  | 0.0094 (6) |
| C14  | 0.0249 (9)  | 0.0350 (8)  | 0.0294 (9)  | 0.0216 (7) | 0.0036 (7)  | 0.0054 (7) |
| C15  | 0.0281 (9)  | 0.0284 (7)  | 0.0304 (9)  | 0.0172 (7) | 0.0044 (7)  | 0.0098 (6) |
| C16  | 0.0216 (8)  | 0.0229 (6)  | 0.0257 (8)  | 0.0112 (6) | 0.0046 (6)  | 0.0075 (6) |
| C21  | 0.0227 (8)  | 0.0273 (7)  | 0.0164 (8)  | 0.0104 (6) | 0.0061 (6)  | 0.0098 (6) |
| C22  | 0.0289 (9)  | 0.0297 (7)  | 0.0219 (8)  | 0.0147 (6) | 0.0099 (7)  | 0.0144 (6) |
| C23  | 0.0329 (10) | 0.0534 (10) | 0.0289 (9)  | 0.0266 (8) | 0.0132 (7)  | 0.0257 (8) |
| C24  | 0.0256 (9)  | 0.0646 (11) | 0.0277 (9)  | 0.0247 (9) | 0.0040 (7)  | 0.0167 (8) |
| C25  | 0.0266 (9)  | 0.0443 (9)  | 0.0265 (9)  | 0.0128 (8) | -0.0014 (7) | 0.0017 (7) |
| C26  | 0.0268 (9)  | 0.0305 (7)  | 0.0246 (8)  | 0.0130 (7) | 0.0015 (7)  | 0.0081 (6) |
| C31  | 0.0272 (9)  | 0.0177 (6)  | 0.0209 (8)  | 0.0106 (6) | 0.0066 (6)  | 0.0092 (6) |
| C32  | 0.0301 (9)  | 0.0313 (7)  | 0.0224 (8)  | 0.0091 (7) | 0.0032 (7)  | 0.0154 (7) |
| C33  | 0.0489 (11) | 0.0361 (8)  | 0.0214 (9)  | 0.0082 (7) | 0.0074 (8)  | 0.0228 (8) |
| C34  | 0.0403 (10) | 0.0367 (8)  | 0.0319 (10) | 0.0190 (8) | 0.0176 (8)  | 0.0242 (7) |
| C35  | 0.0284 (9)  | 0.0316 (8)  | 0.0359 (10) | 0.0202 (7) | 0.0108 (7)  | 0.0133 (7) |
| C36  | 0.0260 (9)  | 0.0210 (6)  | 0.0229 (8)  | 0.0094 (6) | 0.0046 (6)  | 0.0066 (6) |
| N41  | 0.0349 (8)  | 0.0206 (6)  | 0.0236 (7)  | 0.0098 (5) | 0.0118 (6)  | 0.0096 (5) |
| C51  | 0.0395 (10) | 0.0214 (7)  | 0.0299 (9)  | 0.0131 (7) | 0.0133 (7)  | 0.0059 (6) |
| C52  | 0.0384 (10) | 0.0197 (7)  | 0.0229 (8)  | 0.0059 (6) | 0.0117 (7)  | 0.0084 (6) |
| C53  | 0.0515 (12) | 0.0244 (7)  | 0.0247 (9)  | 0.0112 (7) | 0.0080 (8)  | 0.0055 (7) |
| C54  | 0.0590 (13) | 0.0328 (8)  | 0.0335 (10) | 0.0164 (8) | 0.0099 (9)  | 0.0189 (8) |
| C55  | 0.0456 (11) | 0.0352 (8)  | 0.0370 (10) | 0.0111 (8) | 0.0091 (8)  | 0.0176 (8) |
| C56  | 0.0367 (11) | 0.0309 (8)  | 0.0581 (12) | 0.0152 (8) | 0.0119 (9)  | 0.0119 (7) |
| N57  | 0.0370 (9)  | 0.0243 (6)  | 0.0527 (10) | 0.0138 (7) | 0.0115 (7)  | 0.0110 (6) |
| C61  | 0.0318 (10) | 0.0300 (8)  | 0.0258 (9)  | 0.0101 (7) | 0.0053 (7)  | 0.0048 (7) |
| C62  | 0.0277 (9)  | 0.0298 (7)  | 0.0221 (8)  | 0.0121 (6) | 0.0047 (7)  | 0.0108 (6) |
| C63  | 0.0300 (9)  | 0.0261 (7)  | 0.0314 (9)  | 0.0128 (7) | 0.0063 (7)  | 0.0111 (6) |
| C64  | 0.0425 (11) | 0.0277 (7)  | 0.0321 (10) | 0.0121 (7) | 0.0032 (8)  | 0.0164 (7) |
| C65  | 0.0478 (11) | 0.0413 (9)  | 0.0271 (9)  | 0.0164 (8) | 0.0112 (8)  | 0.0288 (8) |
| C66  | 0.0335 (10) | 0.0483 (10) | 0.0328 (10) | 0.0231 (8) | 0.0132 (8)  | 0.0201 (8) |
| N67  | 0.0292 (8)  | 0.0386 (7)  | 0.0292 (8)  | 0.0150 (6) | 0.0044 (6)  | 0.0079 (6) |

Bond lengths [Å]

C1 - C21 = 1.547 (2)  
 C1 - C2 = 1.5509 (18)



|     |   |      |   |             |
|-----|---|------|---|-------------|
| C1  | - | C31  | = | 1.5514 (19) |
| C1  | - | C11  | = | 1.5521 (18) |
| C2  | - | C3   | = | 1.394 (2)   |
| C2  | - | C7   | = | 1.4157 (18) |
| C3  | - | C4   | = | 1.3912 (19) |
| C3  | - | H3   | = | 0.95        |
| C4  | - | C5   | = | 1.388 (2)   |
| C4  | - | C8   | = | 1.502 (2)   |
| C5  | - | C6   | = | 1.382 (2)   |
| C5  | - | H5   | = | 0.95        |
| C6  | - | C7   | = | 1.4087 (19) |
| C6  | - | C9   | = | 1.5111 (19) |
| C7  | - | O7   | = | 1.3563 (17) |
| O7  | - | H7   | = | 0.84        |
| C8  | - | H8A  | = | 0.98        |
| C8  | - | H8B  | = | 0.98        |
| C8  | - | H8C  | = | 0.98        |
| C9  | - | N41  | = | 1.4667 (19) |
| C9  | - | H9A  | = | 0.99        |
| C9  | - | H9B  | = | 0.99        |
| C11 | - | C16  | = | 1.3906 (18) |
| C11 | - | C12  | = | 1.396 (2)   |
| C12 | - | C13  | = | 1.387 (2)   |
| C12 | - | H12  | = | 0.95        |
| C13 | - | C14  | = | 1.389 (2)   |
| C13 | - | H13  | = | 0.95        |
| C14 | - | C15  | = | 1.377 (2)   |
| C14 | - | H14  | = | 0.95        |
| C15 | - | C16  | = | 1.393 (2)   |
| C15 | - | H15  | = | 0.95        |
| C16 | - | H16  | = | 0.95        |
| C21 | - | C26  | = | 1.395 (2)   |
| C21 | - | C22  | = | 1.3989 (18) |
| C22 | - | C23  | = | 1.386 (2)   |
| C22 | - | H22  | = | 0.95        |
| C23 | - | C24  | = | 1.392 (3)   |
| C23 | - | H23  | = | 0.95        |
| C24 | - | C25  | = | 1.384 (2)   |
| C24 | - | H24  | = | 0.95        |
| C25 | - | C26  | = | 1.382 (2)   |
| C25 | - | H25  | = | 0.95        |
| C26 | - | H26  | = | 0.95        |
| C31 | - | C32  | = | 1.385 (2)   |
| C31 | - | C36  | = | 1.397 (2)   |
| C32 | - | C33  | = | 1.392 (2)   |
| C32 | - | H32  | = | 0.95        |
| C33 | - | C34  | = | 1.379 (2)   |
| C33 | - | H33  | = | 0.95        |
| C34 | - | C35  | = | 1.374 (2)   |
| C34 | - | H34  | = | 0.95        |
| C35 | - | C36  | = | 1.386 (2)   |
| C35 | - | H35  | = | 0.95        |
| C36 | - | H36  | = | 0.95        |
| N41 | - | C61  | = | 1.469 (2)   |
| N41 | - | C51  | = | 1.4721 (18) |
| C51 | - | C52  | = | 1.509 (2)   |
| C51 | - | H51A | = | 0.99        |
| C51 | - | H51B | = | 0.99        |

|     |   |      |   |           |
|-----|---|------|---|-----------|
| C52 | - | N57  | = | 1.327 (2) |
| C52 | - | C53  | = | 1.393 (2) |
| C53 | - | C54  | = | 1.375 (3) |
| C53 | - | H53  | = | 0.95      |
| C54 | - | C55  | = | 1.380 (2) |
| C54 | - | H54  | = | 0.95      |
| C55 | - | C56  | = | 1.380 (2) |
| C55 | - | H55  | = | 0.95      |
| C56 | - | N57  | = | 1.336 (2) |
| C56 | - | H56  | = | 0.95      |
| C61 | - | C62  | = | 1.512 (2) |
| C61 | - | H61A | = | 0.99      |
| C61 | - | H61B | = | 0.99      |
| C62 | - | N67  | = | 1.343 (2) |
| C62 | - | C63  | = | 1.388 (2) |
| C63 | - | C64  | = | 1.381 (2) |
| C63 | - | H63  | = | 0.95      |
| C64 | - | C65  | = | 1.385 (2) |
| C64 | - | H64  | = | 0.95      |
| C65 | - | C66  | = | 1.377 (2) |
| C65 | - | H65  | = | 0.95      |
| C66 | - | N67  | = | 1.340 (2) |
| C66 | - | H66  | = | 0.95      |

Angles [°]

|     |   |    |   |     |   |             |
|-----|---|----|---|-----|---|-------------|
| C21 | - | C1 | - | C2  | = | 112.10 (10) |
| C21 | - | C1 | - | C31 | = | 112.42 (11) |
| C2  | - | C1 | - | C31 | = | 106.71 (11) |
| C21 | - | C1 | - | C11 | = | 104.92 (11) |
| C2  | - | C1 | - | C11 | = | 110.13 (11) |
| C31 | - | C1 | - | C11 | = | 110.62 (10) |
| C3  | - | C2 | - | C7  | = | 117.37 (12) |
| C3  | - | C2 | - | C1  | = | 123.09 (11) |
| C7  | - | C2 | - | C1  | = | 119.41 (12) |
| C4  | - | C3 | - | C2  | = | 123.34 (13) |
| C4  | - | C3 | - | H3  | = | 118.3       |
| C2  | - | C3 | - | H3  | = | 118.3       |
| C5  | - | C4 | - | C3  | = | 117.78 (13) |
| C5  | - | C4 | - | C8  | = | 121.38 (13) |
| C3  | - | C4 | - | C8  | = | 120.84 (13) |
| C6  | - | C5 | - | C4  | = | 121.62 (13) |
| C6  | - | C5 | - | H5  | = | 119.2       |
| C4  | - | C5 | - | H5  | = | 119.2       |
| C5  | - | C6 | - | C7  | = | 119.85 (13) |
| C5  | - | C6 | - | C9  | = | 120.14 (12) |
| C7  | - | C6 | - | C9  | = | 119.98 (13) |
| O7  | - | C7 | - | C6  | = | 121.45 (12) |
| O7  | - | C7 | - | C2  | = | 118.55 (12) |
| C6  | - | C7 | - | C2  | = | 120.00 (13) |
| C7  | - | O7 | - | H7  | = | 109.5       |

|     |       |       |               |
|-----|-------|-------|---------------|
| C4  | - C8  | - H8A | = 109.5       |
| C4  | - C8  | - H8B | = 109.5       |
| H8A | - C8  | - H8B | = 109.5       |
| C4  | - C8  | - H8C | = 109.5       |
| H8A | - C8  | - H8C | = 109.5       |
| H8B | - C8  | - H8C | = 109.5       |
| N41 | - C9  | - C6  | = 112.91 (11) |
| N41 | - C9  | - H9A | = 109         |
| C6  | - C9  | - H9A | = 109         |
| N41 | - C9  | - H9B | = 109         |
| C6  | - C9  | - H9B | = 109         |
| H9A | - C9  | - H9B | = 107.8       |
| C16 | - C11 | - C12 | = 117.92 (12) |
| C16 | - C11 | - C1  | = 123.50 (12) |
| C12 | - C11 | - C1  | = 118.57 (11) |
| C13 | - C12 | - C11 | = 121.52 (12) |
| C13 | - C12 | - H12 | = 119.2       |
| C11 | - C12 | - H12 | = 119.2       |
| C12 | - C13 | - C14 | = 119.77 (14) |
| C12 | - C13 | - H13 | = 120.1       |
| C14 | - C13 | - H13 | = 120.1       |
| C15 | - C14 | - C13 | = 119.33 (13) |
| C15 | - C14 | - H14 | = 120.3       |
| C13 | - C14 | - H14 | = 120.3       |
| C14 | - C15 | - C16 | = 120.90 (13) |
| C14 | - C15 | - H15 | = 119.6       |
| C16 | - C15 | - H15 | = 119.6       |
| C11 | - C16 | - C15 | = 120.53 (13) |
| C11 | - C16 | - H16 | = 119.7       |
| C15 | - C16 | - H16 | = 119.7       |
| C26 | - C21 | - C22 | = 117.04 (13) |
| C26 | - C21 | - C1  | = 119.05 (11) |
| C22 | - C21 | - C1  | = 123.82 (13) |
| C23 | - C22 | - C21 | = 121.08 (15) |
| C23 | - C22 | - H22 | = 119.5       |
| C21 | - C22 | - H22 | = 119.5       |
| C22 | - C23 | - C24 | = 120.66 (14) |
| C22 | - C23 | - H23 | = 119.7       |
| C24 | - C23 | - H23 | = 119.7       |
| C25 | - C24 | - C23 | = 118.91 (15) |
| C25 | - C24 | - H24 | = 120.5       |
| C23 | - C24 | - H24 | = 120.5       |
| C26 | - C25 | - C24 | = 120.05 (15) |
| C26 | - C25 | - H25 | = 120         |
| C24 | - C25 | - H25 | = 120         |
| C25 | - C26 | - C21 | = 122.18 (14) |
| C25 | - C26 | - H26 | = 118.9       |
| C21 | - C26 | - H26 | = 118.9       |
| C32 | - C31 | - C36 | = 117.35 (13) |
| C32 | - C31 | - C1  | = 124.03 (13) |
| C36 | - C31 | - C1  | = 118.60 (12) |
| C31 | - C32 | - C33 | = 121.24 (15) |
| C31 | - C32 | - H32 | = 119.4       |
| C33 | - C32 | - H32 | = 119.4       |
| C34 | - C33 | - C32 | = 120.48 (15) |
| C34 | - C33 | - H33 | = 119.8       |
| C32 | - C33 | - H33 | = 119.8       |
| C35 | - C34 | - C33 | = 119.09 (14) |

|      |       |        |               |
|------|-------|--------|---------------|
| C35  | - C34 | - H34  | = 120.5       |
| C33  | - C34 | - H34  | = 120.5       |
| C34  | - C35 | - C36  | = 120.59 (15) |
| C34  | - C35 | - H35  | = 119.7       |
| C36  | - C35 | - H35  | = 119.7       |
| C35  | - C36 | - C31  | = 121.24 (14) |
| C35  | - C36 | - H36  | = 119.4       |
| C31  | - C36 | - H36  | = 119.4       |
| C9   | - N41 | - C61  | = 111.98 (12) |
| C9   | - N41 | - C51  | = 110.36 (11) |
| C61  | - N41 | - C51  | = 112.11 (12) |
| N41  | - C51 | - C52  | = 111.46 (12) |
| N41  | - C51 | - H51A | = 109.3       |
| C52  | - C51 | - H51A | = 109.3       |
| N41  | - C51 | - H51B | = 109.3       |
| C52  | - C51 | - H51B | = 109.3       |
| H51A | - C51 | - H51B | = 108         |
| N57  | - C52 | - C53  | = 122.12 (16) |
| N57  | - C52 | - C51  | = 117.15 (13) |
| C53  | - C52 | - C51  | = 120.74 (14) |
| C54  | - C53 | - C52  | = 119.16 (15) |
| C54  | - C53 | - H53  | = 120.4       |
| C52  | - C53 | - H53  | = 120.4       |
| C53  | - C54 | - C55  | = 119.11 (15) |
| C53  | - C54 | - H54  | = 120.4       |
| C55  | - C54 | - H54  | = 120.4       |
| C54  | - C55 | - C56  | = 117.89 (17) |
| C54  | - C55 | - H55  | = 121.1       |
| C56  | - C55 | - H55  | = 121.1       |
| N57  | - C56 | - C55  | = 123.70 (16) |
| N57  | - C56 | - H56  | = 118.1       |
| C55  | - C56 | - H56  | = 118.1       |
| C52  | - N57 | - C56  | = 118.01 (14) |
| N41  | - C61 | - C62  | = 110.03 (12) |
| N41  | - C61 | - H61A | = 109.7       |
| C62  | - C61 | - H61A | = 109.7       |
| N41  | - C61 | - H61B | = 109.7       |
| C62  | - C61 | - H61B | = 109.7       |
| H61A | - C61 | - H61B | = 108.2       |
| N67  | - C62 | - C63  | = 122.45 (14) |
| N67  | - C62 | - C61  | = 117.04 (13) |
| C63  | - C62 | - C61  | = 120.44 (14) |
| C64  | - C63 | - C62  | = 119.12 (15) |
| C64  | - C63 | - H63  | = 120.4       |
| C62  | - C63 | - H63  | = 120.4       |
| C63  | - C64 | - C65  | = 118.66 (15) |
| C63  | - C64 | - H64  | = 120.7       |
| C65  | - C64 | - H64  | = 120.7       |
| C66  | - C65 | - C64  | = 118.69 (15) |
| C66  | - C65 | - H65  | = 120.7       |
| C64  | - C65 | - H65  | = 120.7       |
| N67  | - C66 | - C65  | = 123.47 (16) |
| N67  | - C66 | - H66  | = 118.3       |
| C65  | - C66 | - H66  | = 118.3       |
| C66  | - N67 | - C62  | = 117.57 (14) |

## L<sup>4</sup>: Crystal structure report

### X-ray crystallographic study

(C<sub>44</sub> H<sub>38</sub> N<sub>2</sub> P<sub>2</sub>); *M* = 656.7. APEXII, Bruker-AXS diffractometer, Mo-K $\alpha$  radiation ( $\lambda$  = 0.71073 Å), *T* = 150(2) K; monoclinic *P*2<sub>1</sub>/*c* (I.T.#14), *a* = 14.0718(9), *b* = 13.5580(8), *c* = 19.6384(9) Å,  $\beta$  = 98.664(2) °, *V* = 3704.0(4) Å<sup>3</sup>, *Z* = 4, *d* = 1.178 g.cm<sup>-3</sup>,  $\mu$  = 0.150 mm<sup>-1</sup>. The structure was solved by direct methods using the *SIR97* program [1], and then refined with full-matrix least-square methods based on *F*<sup>2</sup> (*SHELXL-97*) [2] with the aid of the *WINGX* [3] program. The contribution of the disordered solvents to the calculated structure factors was estimated following the *BYPASS* algorithm [4], implemented as the *SQUEEZE* option in *PLATON* [5]. A new data set, free of solvent contribution, was then used in the final refinement. All non-hydrogen atoms were refined with anisotropic atomic displacement parameters. H atoms were finally included in their calculated positions. A final refinement on *F*<sup>2</sup> with 8432 unique intensities and 433 parameters converged at  $\omega R(F^2)$  = 0.122 (*R*(*F*) = 0.0451) for 6300 observed reflections with *I* > 2 $\sigma$ (*I*).

[1] A. Altomare, M. C. Burla, M. Camalli, G. Cascarano, C. Giacovazzo, A. Guagliardi, A. G. G. Moliterni, G. Polidori, R. Spagna, *J. Appl. Cryst.* (1999) 32, 115-119

[2] Sheldrick G.M., *Acta Cryst.* A64 (2008), 112-122

[3] L. J. Farrugia, *J. Appl. Cryst.*, 1999, 32, 837-838

[4] P. v.d. Sluis and A.L. Spek, *Acta Cryst.* (1990) A46, 194-201

[5] A. L. Spek, *J. Appl. Cryst.* (2003), 36, 7-13

### Structural data

|                                 |                                                                                                                                        |
|---------------------------------|----------------------------------------------------------------------------------------------------------------------------------------|
| Empirical formula               | C <sub>44</sub> H <sub>38</sub> N <sub>2</sub> P <sub>2</sub>                                                                          |
| Formula weight                  | 656.7                                                                                                                                  |
| Temperature                     | 150(2) K                                                                                                                               |
| Wavelength                      | 0.71073 Å                                                                                                                              |
| Crystal system, space group     | monoclinic, <i>P</i> 2 <sub>1</sub> / <i>c</i>                                                                                         |
| Unit cell dimensions            | <i>a</i> = 14.0718(9) Å, $\alpha$ = 90 °<br><i>b</i> = 13.5580(8) Å, $\beta$ = 98.664(2) °<br><i>c</i> = 19.6384(9) Å, $\gamma$ = 90 ° |
| Volume                          | 3704.0(4) Å <sup>3</sup>                                                                                                               |
| <i>Z</i> , Calculated density   | 4, 1.178 (g.cm <sup>-3</sup> )                                                                                                         |
| Absorption coefficient          | 0.150 mm <sup>-1</sup>                                                                                                                 |
| <i>F</i> (000)                  | 1384                                                                                                                                   |
| Crystal size                    | 0.27 x 0.18 x 0.11 mm                                                                                                                  |
| Crystal color                   | colourless                                                                                                                             |
| Theta range for data collection | 2.93 to 27.5 °                                                                                                                         |
| <i>h</i> _min, <i>h</i> _max    | -18, 17                                                                                                                                |

k\_min, k\_max -17 , 14  
 l\_min, l\_max -15 , 25  
 Reflections collected / unique 30098 / 8432 [R(int) = 0.0504]  
 Completeness to theta\_max 0.991  
 Absorption correction type multi-scan  
 Max. and min. transmission 0.984 , 0.726  
 Refinement method Full-matrix least-squares on  $F^2$   
 Data / restraints / parameters 8432 / 0 / 433  
 Goodness-of-fit 1.055  
 Final R indices [ $I > 2\sigma$ ]  $R1^a = 0.0451$ ,  $wR2^b = 0.122$   
 R indices (all data)  $R1^a = 0.0638$ ,  $wR2^b = 0.1312$   
 Largest diff. peak and hole 0.32 and -0.259 e.Å<sup>-3</sup>

$$^aR1 = \sum | |F_o| - |F_c| | / \sum |F_o|$$

$$^b wR2 = \{ \sum [w(F_o^2 - F_c^2)^2] / \sum [w(F_o^2)^2] \}^{1/2}$$

Atomic coordinates and equivalent isotropic displacement parameters (Å<sup>2</sup> × 10<sup>3</sup>). U(eq) is defined as one third of the trace of the orthogonalized U<sub>ij</sub> tensor.

| Atom | x           | y           | z           | U (eq)      |
|------|-------------|-------------|-------------|-------------|
| P1   | 0.31206(3)  | 1.02606(3)  | 0.17199(2)  | 0.02335(12) |
| C1   | 0.40166(11) | 0.95419(12) | 0.13513(8)  | 0.0250(4)   |
| C2   | 0.47474(12) | 0.89972(12) | 0.17347(9)  | 0.0284(4)   |
| H2   | 0.4842      | 0.9039      | 0.2223      | 0.034       |
| C3   | 0.53387(13) | 0.83950(14) | 0.14123(10) | 0.0371(4)   |
| H3   | 0.5829      | 0.802       | 0.1681      | 0.044       |
| C4   | 0.52201(14) | 0.83365(15) | 0.07019(11) | 0.0415(5)   |
| H4   | 0.5623      | 0.7918      | 0.0483      | 0.05        |
| C5   | 0.45139(15) | 0.88881(15) | 0.03130(10) | 0.0415(5)   |
| H5   | 0.4443      | 0.8866      | -0.0176     | 0.05        |
| C6   | 0.39073(13) | 0.94758(13) | 0.06346(9)  | 0.0337(4)   |
| H6   | 0.341       | 0.9838      | 0.0363      | 0.04        |
| C7   | 0.34615(11) | 1.15296(12) | 0.15440(8)  | 0.0257(3)   |
| C8   | 0.43026(12) | 1.18101(13) | 0.12955(9)  | 0.0299(4)   |
| H8   | 0.4758      | 1.1323      | 0.1214      | 0.036       |
| C9   | 0.44760(13) | 1.27966(14) | 0.11680(9)  | 0.0358(4)   |
| H9   | 0.5043      | 1.2977      | 0.0991      | 0.043       |
| C10  | 0.38353(15) | 1.35157(14) | 0.12955(10) | 0.0420(5)   |
| H10  | 0.3964      | 1.4189      | 0.1212      | 0.05        |
| C11  | 0.30025(15) | 1.32537(14) | 0.15462(11) | 0.0430(5)   |
| H11  | 0.256       | 1.3747      | 0.1639      | 0.052       |
| C12  | 0.28180(13) | 1.22694(13) | 0.16616(9)  | 0.0351(4)   |
| H12  | 0.2239      | 1.2094      | 0.1825      | 0.042       |
| C13  | 0.35505(11) | 1.01871(11) | 0.26523(8)  | 0.0228(3)   |
| C14  | 0.42972(12) | 1.07719(12) | 0.29810(9)  | 0.0280(4)   |
| H14  | 0.4621      | 1.1209      | 0.2715      | 0.034       |
| C15  | 0.45765(12) | 1.07264(13) | 0.36898(9)  | 0.0320(4)   |
| H15  | 0.5087      | 1.1129      | 0.3906      | 0.038       |
| C16  | 0.41083(13) | 1.00920(13) | 0.40782(9)  | 0.0328(4)   |
| H16  | 0.4292      | 1.0061      | 0.4563      | 0.039       |
| C17  | 0.33711(12) | 0.95010(12) | 0.37592(8)  | 0.0279(4)   |
| H17  | 0.3055      | 0.9063      | 0.4029      | 0.033       |
| C18  | 0.30843(11) | 0.95374(11) | 0.30497(8)  | 0.0225(3)   |

|      |               |              |              |              |
|------|---------------|--------------|--------------|--------------|
| C19  | 0.22671 (11)  | 0.88906 (12) | 0.27267 (8)  | 0.0236 (3)   |
| H19A | 0.2001        | 0.8529       | 0.3093       | 0.028        |
| H19B | 0.1749        | 0.9309       | 0.2481       | 0.028        |
| P2   | 0.04059 (3)   | 0.58441 (3)  | 0.17445 (2)  | 0.02546 (12) |
| C21  | 0.01216 (11)  | 0.45397 (13) | 0.15967 (8)  | 0.0267 (4)   |
| C22  | 0.04917 (12)  | 0.38891 (14) | 0.21203 (10) | 0.0345 (4)   |
| H22  | 0.0878        | 0.4135       | 0.2523       | 0.041        |
| C23  | 0.03011 (13)  | 0.28875 (15) | 0.20580 (11) | 0.0419 (5)   |
| H23  | 0.0563        | 0.245        | 0.2415       | 0.05         |
| C24  | -0.02669 (13) | 0.25240 (14) | 0.14801 (11) | 0.0412 (5)   |
| H24  | -0.0395       | 0.1837       | 0.1439       | 0.049        |
| C25  | -0.06518 (13) | 0.31583 (13) | 0.09589 (10) | 0.0367 (4)   |
| H25  | -0.1051       | 0.2909       | 0.0563       | 0.044        |
| C26  | -0.04517 (12) | 0.41610 (13) | 0.10166 (9)  | 0.0293 (4)   |
| H26  | -0.071        | 0.4594       | 0.0655       | 0.035        |
| C27  | -0.05845 (11) | 0.64483 (12) | 0.11783 (9)  | 0.0260 (4)   |
| C28  | -0.14862 (12) | 0.64739 (14) | 0.13958 (10) | 0.0352 (4)   |
| H28  | -0.1566       | 0.6176       | 0.1821       | 0.042        |
| C29  | -0.22596 (13) | 0.69220 (15) | 0.10052 (12) | 0.0453 (5)   |
| H29  | -0.2866       | 0.6929       | 0.1162       | 0.054        |
| C30  | -0.21575 (14) | 0.73642 (16) | 0.03822 (12) | 0.0468 (5)   |
| H30  | -0.269        | 0.7677       | 0.0113       | 0.056        |
| C31  | -0.12786 (14) | 0.73440 (17) | 0.01594 (12) | 0.0515 (6)   |
| H31  | -0.1203       | 0.764        | -0.0268      | 0.062        |
| C32  | -0.04994 (13) | 0.68922 (15) | 0.05572 (10) | 0.0403 (5)   |
| H32  | 0.0106        | 0.6888       | 0.0398       | 0.048        |
| C33  | 0.14036 (11)  | 0.60437 (12) | 0.12522 (8)  | 0.0222 (3)   |
| C34  | 0.16495 (11)  | 0.53580 (12) | 0.07763 (8)  | 0.0248 (3)   |
| H34  | 0.1304        | 0.4755       | 0.0711       | 0.03         |
| C35  | 0.23848 (12)  | 0.55390 (13) | 0.03976 (8)  | 0.0275 (4)   |
| H35  | 0.2553        | 0.5057       | 0.0085       | 0.033        |
| C36  | 0.28754 (11)  | 0.64336 (13) | 0.04781 (8)  | 0.0279 (4)   |
| H36  | 0.3364        | 0.6574       | 0.0207       | 0.034        |
| C37  | 0.26517 (11)  | 0.71136 (13) | 0.09498 (8)  | 0.0269 (4)   |
| H37  | 0.2994        | 0.772        | 0.1003       | 0.032        |
| C38  | 0.19320 (11)  | 0.69301 (12) | 0.13515 (8)  | 0.0230 (3)   |
| C39  | 0.17218 (11)  | 0.76819 (12) | 0.18771 (8)  | 0.0263 (4)   |
| H39A | 0.1281        | 0.8187       | 0.1642       | 0.032        |
| H39B | 0.1385        | 0.7349       | 0.2221       | 0.032        |
| N41  | 0.25798 (9)   | 0.81791 (10) | 0.22406 (6)  | 0.0229 (3)   |
| C42  | 0.33291 (11)  | 0.74960 (12) | 0.25636 (8)  | 0.0255 (4)   |
| H42A | 0.3832        | 0.789        | 0.2849       | 0.031        |
| H42B | 0.3631        | 0.7186       | 0.2193       | 0.031        |
| C43  | 0.30209 (11)  | 0.66810 (13) | 0.30098 (9)  | 0.0285 (4)   |
| N44  | 0.27803 (11)  | 0.69472 (11) | 0.36184 (8)  | 0.0368 (4)   |
| C45  | 0.24938 (14)  | 0.62315 (16) | 0.40101 (11) | 0.0472 (5)   |
| H45  | 0.2305        | 0.6414       | 0.4437       | 0.057        |
| C46  | 0.24545 (15)  | 0.52496 (16) | 0.38356 (13) | 0.0516 (6)   |
| H46  | 0.2249        | 0.477        | 0.4134       | 0.062        |
| C47  | 0.27218 (15)  | 0.49811 (15) | 0.32159 (12) | 0.0473 (5)   |
| H47  | 0.2712        | 0.4308       | 0.3081       | 0.057        |
| C48  | 0.30041 (13)  | 0.57025 (13) | 0.27939 (10) | 0.0382 (5)   |
| H48  | 0.3185        | 0.5534       | 0.2362       | 0.046        |

The anisotropic displacement factor exponent takes the form:

$$-2\pi^2 [ h^2 a^{*2} U_{11} + \dots + 2 h k a^* b^* U_{12} ].$$

| Atom | U11         | U22         | U33         | U23           | U13          | U12           |
|------|-------------|-------------|-------------|---------------|--------------|---------------|
| P1   | 0.0233 (2)  | 0.0232 (2)  | 0.0246 (2)  | -0.00015 (17) | 0.00695 (17) | -0.00141 (17) |
| C1   | 0.0276 (8)  | 0.0206 (8)  | 0.0294 (8)  | -0.0019 (7)   | 0.0121 (7)   | -0.0057 (7)   |
| C2   | 0.0273 (9)  | 0.0255 (9)  | 0.0339 (9)  | -0.0017 (7)   | 0.0095 (7)   | -0.0032 (7)   |
| C3   | 0.0305 (9)  | 0.0280 (10) | 0.0550 (12) | -0.0014 (9)   | 0.0141 (9)   | 0.0009 (8)    |
| C4   | 0.0392 (11) | 0.0353 (11) | 0.0564 (12) | -0.0072 (10)  | 0.0279 (9)   | -0.0014 (9)   |
| C5   | 0.0529 (12) | 0.0414 (12) | 0.0356 (10) | -0.0057 (9)   | 0.0238 (9)   | -0.0038 (9)   |
| C6   | 0.0416 (10) | 0.0310 (10) | 0.0312 (9)  | 0.0010 (8)    | 0.0142 (8)   | 0.0000 (8)    |
| C7   | 0.0273 (8)  | 0.0240 (9)  | 0.0257 (8)  | 0.0026 (7)    | 0.0044 (7)   | 0.0016 (7)    |
| C8   | 0.0293 (9)  | 0.0269 (10) | 0.0337 (9)  | 0.0028 (7)    | 0.0060 (7)   | -0.0015 (7)   |
| C9   | 0.0376 (10) | 0.0333 (10) | 0.0356 (9)  | 0.0073 (8)    | 0.0022 (8)   | -0.0104 (8)   |
| C10  | 0.0546 (12) | 0.0256 (10) | 0.0432 (11) | 0.0079 (8)    | -0.0015 (9)  | -0.0067 (9)   |
| C11  | 0.0497 (12) | 0.0265 (10) | 0.0529 (12) | 0.0025 (9)    | 0.0076 (10)  | 0.0079 (9)    |
| C12  | 0.0353 (10) | 0.0315 (10) | 0.0404 (10) | 0.0041 (8)    | 0.0120 (8)   | 0.0036 (8)    |
| C13  | 0.0223 (8)  | 0.0206 (8)  | 0.0267 (8)  | -0.0023 (7)   | 0.0074 (6)   | 0.0023 (6)    |
| C14  | 0.0263 (8)  | 0.0233 (9)  | 0.0352 (9)  | -0.0024 (7)   | 0.0074 (7)   | -0.0026 (7)   |
| C15  | 0.0288 (9)  | 0.0284 (10) | 0.0367 (9)  | -0.0084 (8)   | -0.0015 (8)  | -0.0004 (7)   |
| C16  | 0.0379 (10) | 0.0327 (10) | 0.0263 (8)  | -0.0058 (8)   | -0.0003 (8)  | 0.0069 (8)    |
| C17  | 0.0342 (9)  | 0.0255 (9)  | 0.0254 (8)  | -0.0010 (7)   | 0.0094 (7)   | 0.0028 (7)    |
| C18  | 0.0250 (8)  | 0.0192 (8)  | 0.0243 (8)  | -0.0032 (6)   | 0.0074 (7)   | 0.0024 (6)    |
| C19  | 0.0249 (8)  | 0.0214 (8)  | 0.0265 (8)  | -0.0012 (7)   | 0.0100 (7)   | -0.0006 (6)   |
| P2   | 0.0256 (2)  | 0.0277 (2)  | 0.0246 (2)  | -0.00363 (18) | 0.00878 (17) | -0.00413 (18) |
| C21  | 0.0259 (8)  | 0.0299 (9)  | 0.0271 (8)  | 0.0012 (7)    | 0.0133 (7)   | -0.0011 (7)   |
| C22  | 0.0264 (9)  | 0.0397 (11) | 0.0386 (10) | 0.0098 (8)    | 0.0087 (8)   | -0.0037 (8)   |
| C23  | 0.0314 (10) | 0.0385 (11) | 0.0584 (13) | 0.0203 (10)   | 0.0158 (9)   | 0.0036 (8)    |
| C24  | 0.0410 (11) | 0.0246 (10) | 0.0642 (13) | 0.0029 (9)    | 0.0284 (10)  | -0.0008 (8)   |
| C25  | 0.0408 (10) | 0.0308 (10) | 0.0422 (10) | -0.0071 (8)   | 0.0181 (9)   | -0.0082 (8)   |
| C26  | 0.0338 (9)  | 0.0280 (9)  | 0.0276 (8)  | -0.0005 (7)   | 0.0098 (7)   | -0.0031 (7)   |
| C27  | 0.0224 (8)  | 0.0221 (9)  | 0.0348 (9)  | -0.0060 (7)   | 0.0085 (7)   | -0.0050 (6)   |
| C28  | 0.0276 (9)  | 0.0326 (10) | 0.0484 (11) | -0.0036 (8)   | 0.0152 (8)   | -0.0046 (8)   |
| C29  | 0.0236 (9)  | 0.0436 (12) | 0.0707 (14) | -0.0111 (11)  | 0.0135 (9)   | -0.0021 (8)   |
| C30  | 0.0284 (10) | 0.0450 (12) | 0.0651 (14) | -0.0004 (11)  | 0.0012 (9)   | 0.0051 (9)    |
| C31  | 0.0378 (11) | 0.0640 (15) | 0.0532 (12) | 0.0185 (11)   | 0.0087 (10)  | 0.0098 (10)   |
| C32  | 0.0263 (9)  | 0.0553 (13) | 0.0410 (10) | 0.0081 (10)   | 0.0109 (8)   | 0.0066 (9)    |
| C33  | 0.0223 (8)  | 0.0238 (8)  | 0.0205 (7)  | -0.0008 (6)   | 0.0038 (6)   | -0.0006 (6)   |
| C34  | 0.0260 (8)  | 0.0238 (9)  | 0.0250 (8)  | -0.0028 (7)   | 0.0053 (7)   | -0.0016 (7)   |
| C35  | 0.0296 (9)  | 0.0292 (9)  | 0.0248 (8)  | -0.0055 (7)   | 0.0079 (7)   | 0.0019 (7)    |
| C36  | 0.0248 (8)  | 0.0370 (10) | 0.0237 (8)  | 0.0005 (7)    | 0.0092 (7)   | -0.0020 (7)   |
| C37  | 0.0248 (8)  | 0.0291 (9)  | 0.0270 (8)  | -0.0028 (7)   | 0.0049 (7)   | -0.0055 (7)   |
| C38  | 0.0231 (8)  | 0.0253 (9)  | 0.0205 (7)  | -0.0009 (6)   | 0.0028 (6)   | 0.0001 (6)    |
| C39  | 0.0208 (8)  | 0.0270 (9)  | 0.0315 (8)  | -0.0068 (7)   | 0.0054 (7)   | -0.0025 (7)   |
| N41  | 0.0215 (7)  | 0.0233 (7)  | 0.0247 (7)  | -0.0054 (6)   | 0.0055 (5)   | -0.0016 (5)   |
| C42  | 0.0233 (8)  | 0.0240 (9)  | 0.0300 (8)  | -0.0048 (7)   | 0.0066 (7)   | -0.0001 (7)   |
| C43  | 0.0216 (8)  | 0.0272 (9)  | 0.0358 (9)  | -0.0009 (8)   | 0.0013 (7)   | 0.0026 (7)    |
| N44  | 0.0402 (9)  | 0.0331 (9)  | 0.0394 (8)  | 0.0072 (7)    | 0.0131 (7)   | 0.0052 (7)    |
| C45  | 0.0460 (12) | 0.0473 (13) | 0.0505 (12) | 0.0184 (10)   | 0.0147 (10)  | 0.0086 (10)   |
| C46  | 0.0418 (12) | 0.0423 (13) | 0.0681 (15) | 0.0262 (11)   | 0.0002 (11)  | 0.0004 (9)    |
| C47  | 0.0423 (12) | 0.0266 (10) | 0.0668 (14) | 0.0079 (10)   | -0.0116 (11) | 0.0002 (9)    |
| C48  | 0.0359 (10) | 0.0270 (10) | 0.0481 (11) | -0.0005 (9)   | -0.0048 (9)  | 0.0034 (8)    |



Bond lengths [Å]

|     |   |      |   |            |
|-----|---|------|---|------------|
| P1  | - | C1   | = | 1.8271(17) |
| P1  | - | C7   | = | 1.8329(17) |
| P1  | - | C13  | = | 1.8425(16) |
| C1  | - | C2   | = | 1.392(2)   |
| C1  | - | C6   | = | 1.395(2)   |
| C2  | - | C3   | = | 1.385(2)   |
| C2  | - | H2   | = | 0.95       |
| C3  | - | C4   | = | 1.382(3)   |
| C3  | - | H3   | = | 0.95       |
| C4  | - | C5   | = | 1.379(3)   |
| C4  | - | H4   | = | 0.95       |
| C5  | - | C6   | = | 1.387(3)   |
| C5  | - | H5   | = | 0.95       |
| C6  | - | H6   | = | 0.95       |
| C7  | - | C12  | = | 1.394(2)   |
| C7  | - | C8   | = | 1.399(2)   |
| C8  | - | C9   | = | 1.389(2)   |
| C8  | - | H8   | = | 0.95       |
| C9  | - | C10  | = | 1.376(3)   |
| C9  | - | H9   | = | 0.95       |
| C10 | - | C11  | = | 1.384(3)   |
| C10 | - | H10  | = | 0.95       |
| C11 | - | C12  | = | 1.385(3)   |
| C11 | - | H11  | = | 0.95       |
| C12 | - | H12  | = | 0.95       |
| C13 | - | C14  | = | 1.395(2)   |
| C13 | - | C18  | = | 1.403(2)   |
| C14 | - | C15  | = | 1.390(2)   |
| C14 | - | H14  | = | 0.95       |
| C15 | - | C16  | = | 1.381(3)   |
| C15 | - | H15  | = | 0.95       |
| C16 | - | C17  | = | 1.384(2)   |
| C16 | - | H16  | = | 0.95       |
| C17 | - | C18  | = | 1.392(2)   |
| C17 | - | H17  | = | 0.95       |
| C18 | - | C19  | = | 1.508(2)   |
| C19 | - | N41  | = | 1.4703(19) |
| C19 | - | H19A | = | 0.99       |
| C19 | - | H19B | = | 0.99       |
| P2  | - | C21  | = | 1.8268(18) |
| P2  | - | C27  | = | 1.8393(17) |
| P2  | - | C33  | = | 1.8407(16) |
| C21 | - | C26  | = | 1.391(2)   |
| C21 | - | C22  | = | 1.395(2)   |
| C22 | - | C23  | = | 1.386(3)   |
| C22 | - | H22  | = | 0.95       |
| C23 | - | C24  | = | 1.377(3)   |
| C23 | - | H23  | = | 0.95       |
| C24 | - | C25  | = | 1.383(3)   |
| C24 | - | H24  | = | 0.95       |
| C25 | - | C26  | = | 1.389(2)   |
| C25 | - | H25  | = | 0.95       |
| C26 | - | H26  | = | 0.95       |
| C27 | - | C32  | = | 1.382(2)   |
| C27 | - | C28  | = | 1.399(2)   |

C28 - C29 = 1.375 (3)  
C28 - H28 = 0.95  
C29 - C30 = 1.389 (3)  
C29 - H29 = 0.95  
C30 - C31 = 1.373 (3)  
C30 - H30 = 0.95  
C31 - C32 = 1.389 (3)  
C31 - H31 = 0.95  
C32 - H32 = 0.95  
C33 - C34 = 1.398 (2)  
C33 - C38 = 1.411 (2)  
C34 - C35 = 1.384 (2)  
C34 - H34 = 0.95  
C35 - C36 = 1.393 (2)  
C35 - H35 = 0.95  
C36 - C37 = 1.377 (2)  
C36 - H36 = 0.95  
C37 - C38 = 1.397 (2)  
C37 - H37 = 0.95  
C38 - C39 = 1.511 (2)  
C39 - N41 = 1.4704 (19)  
C39 - H39A = 0.99  
C39 - H39B = 0.99  
N41 - C42 = 1.473 (2)  
C42 - C43 = 1.514 (2)  
C42 - H42A = 0.99  
C42 - H42B = 0.99  
C43 - N44 = 1.340 (2)  
C43 - C48 = 1.392 (2)  
N44 - C45 = 1.338 (2)  
C45 - C46 = 1.374 (3)  
C45 - H45 = 0.95  
C46 - C47 = 1.376 (3)  
C46 - H46 = 0.95  
C47 - C48 = 1.379 (3)  
C47 - H47 = 0.95  
C48 - H48 = 0.95

#### Angles [°]

C1 - P1 - C7 = 102.13 (7)  
C1 - P1 - C13 = 102.83 (7)  
C7 - P1 - C13 = 100.48 (7)  
C2 - C1 - C6 = 118.16 (15)  
C2 - C1 - P1 = 124.50 (12)  
C6 - C1 - P1 = 117.13 (13)  
C3 - C2 - C1 = 120.75 (16)  
C3 - C2 - H2 = 119.6  
C1 - C2 - H2 = 119.6  
C4 - C3 - C2 = 120.38 (18)  
C4 - C3 - H3 = 119.8  
C2 - C3 - H3 = 119.8  
C5 - C4 - C3 = 119.69 (17)  
C5 - C4 - H4 = 120.2  
C3 - C4 - H4 = 120.2

C4 - C5 - C6 = 120.05 (17)  
C4 - C5 - H5 = 120  
C6 - C5 - H5 = 120  
C5 - C6 - C1 = 120.94 (17)  
C5 - C6 - H6 = 119.5  
C1 - C6 - H6 = 119.5  
C12 - C7 - C8 = 117.84 (16)  
C12 - C7 - P1 = 116.70 (13)  
C8 - C7 - P1 = 125.45 (13)  
C9 - C8 - C7 = 120.35 (17)  
C9 - C8 - H8 = 119.8  
C7 - C8 - H8 = 119.8  
C10 - C9 - C8 = 120.77 (17)  
C10 - C9 - H9 = 119.6  
C8 - C9 - H9 = 119.6  
C9 - C10 - C11 = 119.73 (18)  
C9 - C10 - H10 = 120.1  
C11 - C10 - H10 = 120.1  
C10 - C11 - C12 = 119.68 (18)  
C10 - C11 - H11 = 120.2  
C12 - C11 - H11 = 120.2  
C11 - C12 - C7 = 121.60 (17)  
C11 - C12 - H12 = 119.2  
C7 - C12 - H12 = 119.2  
C14 - C13 - C18 = 118.83 (15)  
C14 - C13 - P1 = 122.75 (12)  
C18 - C13 - P1 = 118.39 (11)  
C15 - C14 - C13 = 121.20 (16)  
C15 - C14 - H14 = 119.4  
C13 - C14 - H14 = 119.4  
C16 - C15 - C14 = 119.64 (16)  
C16 - C15 - H15 = 120.2  
C14 - C15 - H15 = 120.2  
C15 - C16 - C17 = 119.87 (16)  
C15 - C16 - H16 = 120.1  
C17 - C16 - H16 = 120.1  
C16 - C17 - C18 = 121.14 (16)  
C16 - C17 - H17 = 119.4  
C18 - C17 - H17 = 119.4  
C17 - C18 - C13 = 119.31 (15)  
C17 - C18 - C19 = 119.22 (14)  
C13 - C18 - C19 = 121.46 (13)  
N41 - C19 - C18 = 111.76 (12)  
N41 - C19 - H19A = 109.3  
C18 - C19 - H19A = 109.3  
N41 - C19 - H19B = 109.3  
C18 - C19 - H19B = 109.3  
H19A - C19 - H19B = 107.9  
C21 - P2 - C27 = 101.96 (7)  
C21 - P2 - C33 = 103.00 (7)  
C27 - P2 - C33 = 100.69 (7)  
C26 - C21 - C22 = 118.45 (16)  
C26 - C21 - P2 = 124.99 (13)  
C22 - C21 - P2 = 116.52 (13)  
C23 - C22 - C21 = 120.58 (18)  
C23 - C22 - H22 = 119.7  
C21 - C22 - H22 = 119.7  
C24 - C23 - C22 = 120.27 (18)

C24 - C23 - H23 = 119.9  
C22 - C23 - H23 = 119.9  
C23 - C24 - C25 = 120.08 (18)  
C23 - C24 - H24 = 120  
C25 - C24 - H24 = 120  
C24 - C25 - C26 = 119.73 (18)  
C24 - C25 - H25 = 120.1  
C26 - C25 - H25 = 120.1  
C25 - C26 - C21 = 120.88 (17)  
C25 - C26 - H26 = 119.6  
C21 - C26 - H26 = 119.6  
C32 - C27 - C28 = 117.52 (16)  
C32 - C27 - P2 = 124.69 (13)  
C28 - C27 - P2 = 117.78 (13)  
C29 - C28 - C27 = 121.26 (18)  
C29 - C28 - H28 = 119.4  
C27 - C28 - H28 = 119.4  
C28 - C29 - C30 = 120.25 (17)  
C28 - C29 - H29 = 119.9  
C30 - C29 - H29 = 119.9  
C31 - C30 - C29 = 119.33 (19)  
C31 - C30 - H30 = 120.3  
C29 - C30 - H30 = 120.3  
C30 - C31 - C32 = 120.1 (2)  
C30 - C31 - H31 = 119.9  
C32 - C31 - H31 = 119.9  
C27 - C32 - C31 = 121.50 (17)  
C27 - C32 - H32 = 119.2  
C31 - C32 - H32 = 119.2  
C34 - C33 - C38 = 118.71 (14)  
C34 - C33 - P2 = 122.58 (12)  
C38 - C33 - P2 = 118.70 (11)  
C35 - C34 - C33 = 121.43 (15)  
C35 - C34 - H34 = 119.3  
C33 - C34 - H34 = 119.3  
C34 - C35 - C36 = 119.43 (15)  
C34 - C35 - H35 = 120.3  
C36 - C35 - H35 = 120.3  
C37 - C36 - C35 = 119.99 (15)  
C37 - C36 - H36 = 120  
C35 - C36 - H36 = 120  
C36 - C37 - C38 = 121.30 (15)  
C36 - C37 - H37 = 119.4  
C38 - C37 - H37 = 119.4  
C37 - C38 - C33 = 119.04 (14)  
C37 - C38 - C39 = 119.92 (14)  
C33 - C38 - C39 = 121.03 (14)  
N41 - C39 - C38 = 114.20 (12)  
N41 - C39 - H39A = 108.7  
C38 - C39 - H39A = 108.7  
N41 - C39 - H39B = 108.7  
C38 - C39 - H39B = 108.7  
H39A - C39 - H39B = 107.6  
C19 - N41 - C39 = 108.17 (11)  
C19 - N41 - C42 = 113.44 (12)  
C39 - N41 - C42 = 113.76 (12)  
N41 - C42 - C43 = 117.34 (13)  
N41 - C42 - H42A = 108

C43 - C42 - H42A = 108  
N41 - C42 - H42B = 108  
C43 - C42 - H42B = 108  
H42A - C42 - H42B = 107.2  
N44 - C43 - C48 = 122.24 (17)  
N44 - C43 - C42 = 116.92 (15)  
C48 - C43 - C42 = 120.84 (16)  
C45 - N44 - C43 = 117.15 (17)  
N44 - C45 - C46 = 124.3 (2)  
N44 - C45 - H45 = 117.8  
C46 - C45 - H45 = 117.8  
C45 - C46 - C47 = 118.1 (2)  
C45 - C46 - H46 = 121  
C47 - C46 - H46 = 121  
C46 - C47 - C48 = 119.1 (2)  
C46 - C47 - H47 = 120.5  
C48 - C47 - H47 = 120.5  
C47 - C48 - C43 = 119.10 (19)  
C47 - C48 - H48 = 120.5  
C43 - C48 - H48 = 120.5

#### Torsion angles [°]

C7 - P1 - C1 - C2 = 110.94 (14)  
C13 - P1 - C1 - C2 = 7.07 (16)  
C7 - P1 - C1 - C6 = -74.44 (14)  
C13 - P1 - C1 - C6 = -178.32 (13)  
C6 - C1 - C2 - C3 = -1.0 (2)  
P1 - C1 - C2 - C3 = 173.57 (13)  
C1 - C2 - C3 - C4 = 0.9 (3)  
C2 - C3 - C4 - C5 = 0.6 (3)  
C3 - C4 - C5 - C6 = -1.9 (3)  
C4 - C5 - C6 - C1 = 1.9 (3)  
C2 - C1 - C6 - C5 = -0.4 (3)  
P1 - C1 - C6 - C5 = -175.35 (14)  
C1 - P1 - C7 - C12 = 169.72 (13)  
C13 - P1 - C7 - C12 = -84.57 (14)  
C1 - P1 - C7 - C8 = -9.44 (16)  
C13 - P1 - C7 - C8 = 96.27 (15)  
C12 - C7 - C8 - C9 = -0.5 (2)  
P1 - C7 - C8 - C9 = 178.69 (13)  
C7 - C8 - C9 - C10 = 1.2 (3)  
C8 - C9 - C10 - C11 = -0.8 (3)  
C9 - C10 - C11 - C12 = -0.5 (3)  
C10 - C11 - C12 - C7 = 1.3 (3)  
C8 - C7 - C12 - C11 = -0.8 (3)  
P1 - C7 - C12 - C11 = 179.99 (15)  
C1 - P1 - C13 - C14 = 79.44 (14)  
C7 - P1 - C13 - C14 = -25.71 (15)  
C1 - P1 - C13 - C18 = -102.68 (13)  
C7 - P1 - C13 - C18 = 152.17 (13)  
C18 - C13 - C14 - C15 = -0.6 (2)  
P1 - C13 - C14 - C15 = 177.28 (13)  
C13 - C14 - C15 - C16 = 0.0 (3)  
C14 - C15 - C16 - C17 = 0.5 (3)

C15 - C16 - C17 - C18 = -0.5(3)  
C16 - C17 - C18 - C13 = -0.2(2)  
C16 - C17 - C18 - C19 = -179.06(15)  
C14 - C13 - C18 - C17 = 0.7(2)  
P1 - C13 - C18 - C17 = -177.30(12)  
C14 - C13 - C18 - C19 = 179.54(14)  
P1 - C13 - C18 - C19 = 1.6(2)  
C17 - C18 - C19 - N41 = -117.62(16)  
C13 - C18 - C19 - N41 = 63.51(19)  
C27 - P2 - C21 - C26 = 22.07(16)  
C33 - P2 - C21 - C26 = -82.02(15)  
C27 - P2 - C21 - C22 = -155.99(13)  
C33 - P2 - C21 - C22 = 99.92(13)  
C26 - C21 - C22 - C23 = 0.8(3)  
P2 - C21 - C22 - C23 = 179.01(14)  
C21 - C22 - C23 - C24 = -0.8(3)  
C22 - C23 - C24 - C25 = -0.1(3)  
C23 - C24 - C25 - C26 = 0.9(3)  
C24 - C25 - C26 - C21 = -0.9(3)  
C22 - C21 - C26 - C25 = 0.0(3)  
P2 - C21 - C26 - C25 = -178.04(13)  
C21 - P2 - C27 - C32 = -105.10(16)  
C33 - P2 - C27 - C32 = 0.80(17)  
C21 - P2 - C27 - C28 = 75.89(14)  
C33 - P2 - C27 - C28 = -178.21(13)  
C32 - C27 - C28 - C29 = 0.2(3)  
P2 - C27 - C28 - C29 = 179.24(14)  
C27 - C28 - C29 - C30 = -0.2(3)  
C28 - C29 - C30 - C31 = 0.4(3)  
C29 - C30 - C31 - C32 = -0.5(3)  
C28 - C27 - C32 - C31 = -0.3(3)  
P2 - C27 - C32 - C31 = -179.33(17)  
C30 - C31 - C32 - C27 = 0.5(3)  
C21 - P2 - C33 - C34 = 12.76(15)  
C27 - P2 - C33 - C34 = -92.32(14)  
C21 - P2 - C33 - C38 = -168.21(12)  
C27 - P2 - C33 - C38 = 86.72(13)  
C38 - C33 - C34 - C35 = -1.0(2)  
P2 - C33 - C34 - C35 = 178.05(12)  
C33 - C34 - C35 - C36 = -1.7(2)  
C34 - C35 - C36 - C37 = 2.4(2)  
C35 - C36 - C37 - C38 = -0.5(2)  
C36 - C37 - C38 - C33 = -2.2(2)  
C36 - C37 - C38 - C39 = 178.47(15)  
C34 - C33 - C38 - C37 = 2.9(2)  
P2 - C33 - C38 - C37 = -176.15(12)  
C34 - C33 - C38 - C39 = -177.80(14)  
P2 - C33 - C38 - C39 = 3.1(2)  
C37 - C38 - C39 - N41 = -37.9(2)  
C33 - C38 - C39 - N41 = 142.88(15)  
C18 - C19 - N41 - C39 = -171.87(13)  
C18 - C19 - N41 - C42 = 60.95(17)  
C38 - C39 - N41 - C19 = 179.47(13)  
C38 - C39 - N41 - C42 = -53.53(18)  
C19 - N41 - C42 - C43 = 74.37(17)  
C39 - N41 - C42 - C43 = -49.83(18)  
N41 - C42 - C43 - N44 = -71.30(19)  
N41 - C42 - C43 - C48 = 109.49(17)

C48 - C43 - N44 - C45 = -1.8 (2)  
C42 - C43 - N44 - C45 = 179.03 (15)  
C43 - N44 - C45 - C46 = 1.6 (3)  
N44 - C45 - C46 - C47 = -0.4 (3)  
C45 - C46 - C47 - C48 = -0.8 (3)  
C46 - C47 - C48 - C43 = 0.7 (3)  
N44 - C43 - C48 - C47 = 0.6 (3)  
C42 - C43 - C48 - C47 = 179.81 (15)

## L<sup>5</sup>: Crystal structure report

### X-ray crystallographic study

( $2(C_{57}H_{48}N_2P_3)$ );  $M = 1679.75$ . APEXII, Bruker-AXS diffractometer, Mo-K $\alpha$  radiation ( $\lambda = 0.71073 \text{ \AA}$ ),  $T = 150(2) \text{ K}$ ; triclinic  $P-1$  (I.T.#2),  $a = 15.6653(16)$ ,  $b = 18.0030(18)$ ,  $c = 18.1172(19) \text{ \AA}$ ,  $\alpha = 98.534(4)$ ,  $\beta = 112.551(4)$ ,  $\gamma = 92.618(4)^\circ$ ,  $V = 4637.0(8) \text{ \AA}^3$ ,  $Z = 2$ ,  $d = 1.203 \text{ g.cm}^{-3}$ ,  $\mu = 0.167 \text{ mm}^{-1}$ . The structure was solved by direct methods using the *SIR97* program [1], and then refined with full-matrix least-square methods based on  $F^2$  (*SHELXL-97*) [2] with the aid of the *WINGX* [3] program. All non-hydrogen atoms were refined with anisotropic atomic displacement parameters. H atoms were finally included in their calculated positions. A final refinement on  $F^2$  with 20787 unique intensities and 1099 parameters converged at  $\omega R(F^2) = 0.1132$  ( $R(F) = 0.0488$ ) for 15461 observed reflections with  $I > 2\sigma(I)$ .

[1] A. Altomare, M. C. Burla, M. Camalli, G. Cascarano, C. Giacovazzo, A. Guagliardi, A. G. G. Moliterni, G. Polidori, R. Spagna, *J. Appl. Cryst.* (1999) 32, 115-119

[2] Sheldrick G.M., *Acta Cryst. A*64 (2008), 112-122

[3] L. J. Farrugia, *J. Appl. Cryst.*, 1999, 32, 837-838

### Structural data

|                                       |                                                                                                                                                                                        |
|---------------------------------------|----------------------------------------------------------------------------------------------------------------------------------------------------------------------------------------|
| Empirical formula                     | C <sub>114</sub> H <sub>96</sub> N <sub>2</sub> P <sub>6</sub>                                                                                                                         |
| Extended formula                      | 2(C <sub>57</sub> H <sub>48</sub> N <sub>2</sub> P <sub>3</sub> )                                                                                                                      |
| Formula weight                        | 1679.75                                                                                                                                                                                |
| Temperature                           | 150(2) K                                                                                                                                                                               |
| Wavelength                            | 0.71073 Å                                                                                                                                                                              |
| Crystal system, space group           | triclinic, $P-1$                                                                                                                                                                       |
| Unit cell dimensions                  | $a = 15.6653(16) \text{ \AA}$ , $\alpha = 98.534(4)^\circ$<br>$b = 18.0030(18) \text{ \AA}$ , $\beta = 112.551(4)^\circ$<br>$c = 18.1172(19) \text{ \AA}$ , $\gamma = 92.618(4)^\circ$ |
| Volume                                | 4637.0(8) Å <sup>3</sup>                                                                                                                                                               |
| $Z$ , Calculated density              | 2, 1.203 (g.cm <sup>-3</sup> )                                                                                                                                                         |
| Absorption coefficient                | 0.167 mm <sup>-1</sup>                                                                                                                                                                 |
| $F(000)$                              | 1768                                                                                                                                                                                   |
| Crystal size                          | 0.56 x 0.39 x 0.25 mm                                                                                                                                                                  |
| Crystal color                         | colourless                                                                                                                                                                             |
| Theta range for data collection       | 2.91 to 27.48 °                                                                                                                                                                        |
| $h_{\text{min}}$ , $h_{\text{max}}$   | -14, 20                                                                                                                                                                                |
| $k_{\text{min}}$ , $k_{\text{max}}$   | -23, 23                                                                                                                                                                                |
| $l_{\text{min}}$ , $l_{\text{max}}$   | -23, 21                                                                                                                                                                                |
| Reflections collected / unique        | 65501 / 20787 [R(int) = 0.0637]                                                                                                                                                        |
| Completeness to $\theta_{\text{max}}$ | 0.976                                                                                                                                                                                  |
| Absorption correction type            | multi-scan                                                                                                                                                                             |
| Max. and min. transmission            | 0.959, 0.876                                                                                                                                                                           |
| Refinement method                     | Full-matrix least-squares on $F^2$                                                                                                                                                     |
| Data / restraints / parameters        | 20787 / 0 / 1099                                                                                                                                                                       |
| Goodness-of-fit                       | 1.038                                                                                                                                                                                  |
| Final R indices [ $I > 2\sigma$ ]     | $R1^a = 0.0488$ , $wR2^b = 0.1132$                                                                                                                                                     |
| R indices (all data)                  | $R1^a = 0.0714$ , $wR2^b = 0.1261$                                                                                                                                                     |



Largest diff. peak and hole

0.356 and -0.34 e.Å<sup>-3</sup>

$$^aR1 = \sum | |F_o| - |F_c| | / \sum |F_o|$$

$$^bWR2 = \{ \sum [w(F_o^2 - F_c^2)^2] / \sum [w(F_o^2)^2] \}^{1/2}$$

Atomic coordinates and equivalent isotropic displacement parameters (Å<sup>2</sup> x 10<sup>3</sup>). U(eq) is defined as one third of the trace of the orthogonalized U<sub>ij</sub> tensor.

| Atom | x            | y             | z            | U(eq)        |
|------|--------------|---------------|--------------|--------------|
| N1   | 0.28365 (10) | 0.26589 (7)   | 0.72405 (8)  | 0.0221 (3)   |
| P1   | 0.46191 (3)  | 0.22248 (3)   | 0.95512 (3)  | 0.02600 (11) |
| C1   | 0.48733 (13) | 0.31183 (10)  | 1.02792 (10) | 0.0263 (4)   |
| C2   | 0.41986 (14) | 0.33160 (11)  | 1.05707 (12) | 0.0330 (4)   |
| H2   | 0.3643       | 0.2985        | 1.0403       | 0.04         |
| C3   | 0.43225 (16) | 0.39883 (12)  | 1.11022 (13) | 0.0416 (5)   |
| H3   | 0.3852       | 0.4114        | 1.1294       | 0.05         |
| C4   | 0.51181 (17) | 0.44718 (12)  | 1.13526 (13) | 0.0453 (6)   |
| H4   | 0.5203       | 0.493         | 1.172        | 0.054        |
| C5   | 0.57992 (17) | 0.42921 (12)  | 1.10696 (14) | 0.0472 (6)   |
| H5   | 0.6354       | 0.4627        | 1.1244       | 0.057        |
| C6   | 0.56724 (14) | 0.36217 (11)  | 1.05302 (12) | 0.0368 (5)   |
| H6   | 0.6138       | 0.3506        | 1.033        | 0.044        |
| C7   | 0.55291 (13) | 0.16450 (10)  | 1.00450 (11) | 0.0278 (4)   |
| C8   | 0.63243 (14) | 0.18788 (11)  | 1.07493 (12) | 0.0348 (5)   |
| H8   | 0.6423       | 0.2383        | 1.1036       | 0.042        |
| C9   | 0.69754 (15) | 0.13806 (12)  | 1.10370 (13) | 0.0421 (5)   |
| H9   | 0.7522       | 0.1548        | 1.1514       | 0.051        |
| C10  | 0.68315 (16) | 0.06462 (12)  | 1.06347 (12) | 0.0413 (5)   |
| H10  | 0.7273       | 0.0305        | 1.084        | 0.05         |
| C11  | 0.60509 (17) | 0.04050 (11)  | 0.99376 (13) | 0.0450 (6)   |
| H11  | 0.5955       | -0.0101       | 0.9656       | 0.054        |
| C12  | 0.54027 (16) | 0.09005 (11)  | 0.96455 (12) | 0.0413 (5)   |
| H12  | 0.4862       | 0.0729        | 0.9164       | 0.05         |
| C13  | 0.50482 (12) | 0.25418 (9)   | 0.88194 (10) | 0.0225 (4)   |
| C14  | 0.59356 (13) | 0.24359 (10)  | 0.88408 (11) | 0.0278 (4)   |
| H14  | 0.6334       | 0.2175        | 0.9234       | 0.033        |
| C15  | 0.62435 (13) | 0.27048 (10)  | 0.82987 (11) | 0.0307 (4)   |
| H15  | 0.6843       | 0.2617        | 0.8314       | 0.037        |
| C16  | 0.56824 (14) | 0.31001 (10)  | 0.77364 (11) | 0.0314 (4)   |
| H16  | 0.5905       | 0.3307        | 0.7382       | 0.038        |
| C17  | 0.47944 (13) | 0.31928 (9)   | 0.76923 (10) | 0.0281 (4)   |
| H17  | 0.4406       | 0.3459        | 0.7299       | 0.034        |
| C18  | 0.44563 (12) | 0.29031 (9)   | 0.82135 (10) | 0.0223 (4)   |
| C19  | 0.34575 (12) | 0.29752 (9)   | 0.80874 (10) | 0.0244 (4)   |
| H19A | 0.3295       | 0.2703        | 0.846        | 0.029        |
| H19B | 0.3375       | 0.3515        | 0.8214       | 0.029        |
| P2   | 0.20684 (3)  | 0.01548 (2)   | 0.64129 (3)  | 0.02225 (11) |
| C21  | 0.32754 (12) | -0.00448 (9)  | 0.69085 (10) | 0.0256 (4)   |
| C22  | 0.34421 (15) | -0.05522 (10) | 0.74509 (12) | 0.0397 (5)   |
| H22  | 0.2934       | -0.0783       | 0.753        | 0.048        |
| C23  | 0.43257 (16) | -0.07238 (12) | 0.78711 (13) | 0.0474 (6)   |
| H23  | 0.4421       | -0.1075       | 0.823        | 0.057        |
| C24  | 0.50734 (16) | -0.03866 (12) | 0.77721 (12) | 0.0440 (6)   |

|      |               |               |              |              |
|------|---------------|---------------|--------------|--------------|
| H24  | 0.5684        | -0.0505       | 0.8061       | 0.053        |
| C25  | 0.49264 (14)  | 0.01227 (12)  | 0.72505 (12) | 0.0430 (5)   |
| H25  | 0.5441        | 0.036         | 0.7185       | 0.052        |
| C26  | 0.40346 (13)  | 0.02946 (11)  | 0.68179 (11) | 0.0321 (4)   |
| H26  | 0.3944        | 0.0646        | 0.6459       | 0.039        |
| C27  | 0.15361 (12)  | -0.07101 (9)  | 0.56591 (10) | 0.0232 (4)   |
| C28  | 0.20216 (13)  | -0.11855 (10) | 0.53274 (11) | 0.0301 (4)   |
| H28  | 0.2679        | -0.1088       | 0.5521       | 0.036        |
| C29  | 0.15581 (14)  | -0.17991 (10) | 0.47183 (12) | 0.0375 (5)   |
| H29  | 0.1898        | -0.2115       | 0.4491       | 0.045        |
| C30  | 0.06050 (14)  | -0.19540 (11) | 0.44400 (13) | 0.0444 (6)   |
| H30  | 0.0288        | -0.2374       | 0.402        | 0.053        |
| C31  | 0.01134 (14)  | -0.14959 (11) | 0.47735 (14) | 0.0448 (6)   |
| H31  | -0.0542       | -0.1603       | 0.4588       | 0.054        |
| C32  | 0.05782 (13)  | -0.08778 (10) | 0.53808 (12) | 0.0328 (4)   |
| H32  | 0.0237        | -0.0565       | 0.5609       | 0.039        |
| C33  | 0.21647 (11)  | 0.08186 (9)   | 0.57650 (10) | 0.0198 (3)   |
| C34  | 0.18501 (12)  | 0.06127 (9)   | 0.49175 (10) | 0.0243 (4)   |
| H34  | 0.1601        | 0.0105        | 0.4667       | 0.029        |
| C35  | 0.18949 (13)  | 0.11330 (10)  | 0.44379 (11) | 0.0275 (4)   |
| H35  | 0.1663        | 0.0984        | 0.3864       | 0.033        |
| C36  | 0.22778 (13)  | 0.18680 (10)  | 0.47958 (11) | 0.0277 (4)   |
| H36  | 0.2322        | 0.2225        | 0.4471       | 0.033        |
| C37  | 0.25984 (12)  | 0.20821 (9)   | 0.56332 (10) | 0.0259 (4)   |
| H37  | 0.2872        | 0.2586        | 0.5877       | 0.031        |
| C38  | 0.25287 (12)  | 0.15782 (9)   | 0.61239 (10) | 0.0220 (4)   |
| C39  | 0.28704 (13)  | 0.18431 (9)   | 0.70350 (10) | 0.0261 (4)   |
| H39A | 0.248         | 0.1565        | 0.7247       | 0.031        |
| H39B | 0.3518        | 0.1726        | 0.7301       | 0.031        |
| P3   | 0.14937 (3)   | 0.37639 (2)   | 0.84927 (3)  | 0.02245 (11) |
| C41  | 0.15716 (12)  | 0.46332 (9)   | 0.91918 (10) | 0.0234 (4)   |
| C42  | 0.08105 (14)  | 0.49720 (10)  | 0.92389 (11) | 0.0302 (4)   |
| H42  | 0.0199        | 0.4756        | 0.8884       | 0.036        |
| C43  | 0.09401 (15)  | 0.56285 (10)  | 0.98043 (12) | 0.0373 (5)   |
| H43  | 0.0416        | 0.5854        | 0.9837       | 0.045        |
| C44  | 0.18207 (16)  | 0.59506 (10)  | 1.03131 (12) | 0.0384 (5)   |
| H44  | 0.1904        | 0.6402        | 1.0691       | 0.046        |
| C45  | 0.25892 (15)  | 0.56192 (10)  | 1.02769 (12) | 0.0362 (5)   |
| H45  | 0.3199        | 0.5842        | 1.0629       | 0.043        |
| C46  | 0.24613 (13)  | 0.49595 (10)  | 0.97239 (11) | 0.0286 (4)   |
| H46  | 0.2988        | 0.4727        | 0.9708       | 0.034        |
| C47  | 0.02420 (12)  | 0.34473 (9)   | 0.80416 (10) | 0.0226 (4)   |
| C48  | -0.03806 (12) | 0.36179 (9)   | 0.73143 (10) | 0.0245 (4)   |
| H48  | -0.0162       | 0.3923        | 0.7024       | 0.029        |
| C49  | -0.13124 (13) | 0.33474 (10)  | 0.70113 (11) | 0.0285 (4)   |
| H49  | -0.1727       | 0.3466        | 0.6513       | 0.034        |
| C50  | -0.16454 (14) | 0.29073 (10)  | 0.74254 (12) | 0.0334 (4)   |
| H50  | -0.2287       | 0.2726        | 0.7217       | 0.04         |
| C51  | -0.10329 (15) | 0.27314 (11)  | 0.81510 (13) | 0.0397 (5)   |
| H51  | -0.1257       | 0.2429        | 0.8441       | 0.048        |
| C52  | -0.01020 (14) | 0.29937 (11)  | 0.84510 (12) | 0.0345 (5)   |
| H52  | 0.0312        | 0.2864        | 0.8943       | 0.041        |
| C53  | 0.16442 (12)  | 0.41498 (9)   | 0.76578 (10) | 0.0224 (4)   |
| C54  | 0.16318 (13)  | 0.49184 (10)  | 0.76077 (11) | 0.0269 (4)   |
| H54  | 0.152         | 0.5257        | 0.8007       | 0.032        |
| C55  | 0.17798 (14)  | 0.51938 (11)  | 0.69881 (12) | 0.0341 (5)   |
| H55  | 0.1775        | 0.5718        | 0.6968       | 0.041        |
| C56  | 0.19350 (15)  | 0.47071 (11)  | 0.63985 (12) | 0.0379 (5)   |

|      |               |               |              |              |
|------|---------------|---------------|--------------|--------------|
| H56  | 0.2033        | 0.4894        | 0.597        | 0.046        |
| C57  | 0.19460 (14)  | 0.39476 (11)  | 0.64366 (11) | 0.0335 (5)   |
| H57  | 0.2046        | 0.3613        | 0.6027       | 0.04         |
| C58  | 0.18135 (12)  | 0.36604 (9)   | 0.70607 (10) | 0.0232 (4)   |
| C59  | 0.18831 (12)  | 0.28267 (9)   | 0.70723 (11) | 0.0264 (4)   |
| H59A | 0.1689        | 0.268         | 0.7495       | 0.032        |
| H59B | 0.146         | 0.2529        | 0.654        | 0.032        |
| N11  | 0.28523 (10)  | 0.23771 (7)   | 0.24049 (8)  | 0.0210 (3)   |
| P11  | 0.47167 (3)   | 0.21706 (3)   | 0.47932 (3)  | 0.02383 (11) |
| C101 | 0.50626 (13)  | 0.31104 (9)   | 0.54540 (10) | 0.0248 (4)   |
| C102 | 0.43598 (14)  | 0.35164 (11)  | 0.55378 (11) | 0.0328 (4)   |
| H102 | 0.3731        | 0.3295        | 0.5281       | 0.039        |
| C103 | 0.45699 (17)  | 0.42438 (11)  | 0.59953 (13) | 0.0429 (5)   |
| H103 | 0.4085        | 0.4517        | 0.6048       | 0.051        |
| C104 | 0.54778 (18)  | 0.45669 (11)  | 0.63708 (13) | 0.0446 (6)   |
| H104 | 0.562         | 0.5062        | 0.6686       | 0.053        |
| C105 | 0.61853 (16)  | 0.41750 (11)  | 0.62916 (12) | 0.0390 (5)   |
| H105 | 0.6813        | 0.4399        | 0.6552       | 0.047        |
| C106 | 0.59751 (13)  | 0.34524 (10)  | 0.58299 (11) | 0.0302 (4)   |
| H106 | 0.6462        | 0.3187        | 0.577        | 0.036        |
| C107 | 0.55667 (12)  | 0.15737 (10)  | 0.53411 (10) | 0.0250 (4)   |
| C108 | 0.60027 (14)  | 0.16928 (10)  | 0.61858 (11) | 0.0332 (4)   |
| H108 | 0.5929        | 0.2139        | 0.6498       | 0.04         |
| C109 | 0.65417 (15)  | 0.11693 (11)  | 0.65760 (12) | 0.0404 (5)   |
| H109 | 0.6837        | 0.1261        | 0.7152       | 0.048        |
| C110 | 0.66547 (14)  | 0.05163 (11)  | 0.61377 (13) | 0.0373 (5)   |
| H110 | 0.703         | 0.0161        | 0.6408       | 0.045        |
| C111 | 0.62178 (14)  | 0.03840 (11)  | 0.53020 (13) | 0.0373 (5)   |
| H111 | 0.629         | -0.0067       | 0.4995       | 0.045        |
| C112 | 0.56754 (14)  | 0.09038 (10)  | 0.49080 (12) | 0.0330 (4)   |
| H112 | 0.5372        | 0.0802        | 0.4332       | 0.04         |
| C113 | 0.51250 (12)  | 0.23919 (9)   | 0.40121 (10) | 0.0226 (4)   |
| C114 | 0.60335 (12)  | 0.23278 (10)  | 0.40735 (11) | 0.0276 (4)   |
| H114 | 0.646         | 0.2145        | 0.4524       | 0.033        |
| C115 | 0.63238 (13)  | 0.25254 (11)  | 0.34902 (12) | 0.0337 (5)   |
| H115 | 0.6942        | 0.2469        | 0.3537       | 0.04         |
| C116 | 0.57133 (14)  | 0.28050 (11)  | 0.28384 (12) | 0.0360 (5)   |
| H116 | 0.5913        | 0.2951        | 0.2442       | 0.043        |
| C117 | 0.48133 (14)  | 0.28698 (10)  | 0.27694 (11) | 0.0317 (4)   |
| H117 | 0.4396        | 0.3062        | 0.2322       | 0.038        |
| C118 | 0.44995 (12)  | 0.26594 (9)   | 0.33409 (10) | 0.0228 (4)   |
| C119 | 0.35034 (12)  | 0.27374 (10)  | 0.32238 (10) | 0.0240 (4)   |
| H11A | 0.3363        | 0.2502        | 0.3631       | 0.029        |
| H11B | 0.3419        | 0.328         | 0.3314       | 0.029        |
| P12  | 0.19062 (3)   | -0.01413 (2)  | 0.16463 (3)  | 0.02231 (11) |
| C121 | 0.09442 (12)  | 0.01251 (9)   | 0.19296 (10) | 0.0240 (4)   |
| C122 | 0.07299 (14)  | -0.02844 (10) | 0.24516 (11) | 0.0304 (4)   |
| H122 | 0.1074        | -0.0689       | 0.2634       | 0.036        |
| C123 | 0.00238 (14)  | -0.01036 (11) | 0.27006 (11) | 0.0377 (5)   |
| H123 | -0.0129       | -0.0396       | 0.3037       | 0.045        |
| C124 | -0.04616 (14) | 0.04986 (11)  | 0.24644 (12) | 0.0381 (5)   |
| H124 | -0.0936       | 0.0629        | 0.2649       | 0.046        |
| C125 | -0.02533 (14) | 0.09106 (11)  | 0.19585 (12) | 0.0350 (5)   |
| H125 | -0.0584       | 0.1328        | 0.1798       | 0.042        |
| C126 | 0.04340 (13)  | 0.07213 (9)   | 0.16836 (11) | 0.0282 (4)   |
| H126 | 0.0558        | 0.1001        | 0.1324       | 0.034        |
| C127 | 0.13649 (12)  | -0.10053 (9)  | 0.08875 (10) | 0.0221 (4)   |
| C128 | 0.19396 (13)  | -0.14263 (9)  | 0.06059 (12) | 0.0299 (4)   |

|      |               |               |               |              |
|------|---------------|---------------|---------------|--------------|
| H128 | 0.2589        | -0.1271       | 0.082         | 0.036        |
| C129 | 0.15682 (14)  | -0.20714 (10) | 0.00140 (12)  | 0.0345 (5)   |
| H129 | 0.1964        | -0.235        | -0.0181       | 0.041        |
| C130 | 0.06282 (14)  | -0.23114 (10) | -0.02937 (11) | 0.0322 (4)   |
| H130 | 0.0377        | -0.2753       | -0.0698       | 0.039        |
| C131 | 0.00583 (13)  | -0.19065 (9)  | -0.00108 (10) | 0.0280 (4)   |
| H131 | -0.0588       | -0.2073       | -0.0217       | 0.034        |
| C132 | 0.04208 (12)  | -0.12556 (9)  | 0.05753 (10)  | 0.0246 (4)   |
| H132 | 0.002         | -0.0979       | 0.0764        | 0.029        |
| C133 | 0.19811 (11)  | 0.05313 (9)   | 0.09938 (10)  | 0.0205 (4)   |
| C134 | 0.16277 (12)  | 0.03179 (9)   | 0.01464 (10)  | 0.0239 (4)   |
| H134 | 0.1263        | -0.0157       | -0.01         | 0.029        |
| C135 | 0.17964 (13)  | 0.07807 (9)   | -0.03418 (10) | 0.0255 (4)   |
| H135 | 0.154         | 0.0626        | -0.0915       | 0.031        |
| C136 | 0.23368 (13)  | 0.14656 (10)  | 0.00080 (11)  | 0.0290 (4)   |
| H136 | 0.2476        | 0.1777        | -0.032        | 0.035        |
| C137 | 0.26768 (13)  | 0.16964 (9)   | 0.08451 (11)  | 0.0270 (4)   |
| H137 | 0.3042        | 0.2172        | 0.1083        | 0.032        |
| C138 | 0.24954 (12)  | 0.12488 (9)   | 0.13445 (10)  | 0.0212 (4)   |
| C139 | 0.28783 (12)  | 0.15531 (9)   | 0.22543 (10)  | 0.0231 (4)   |
| H13A | 0.2503        | 0.1305        | 0.25          | 0.028        |
| H13B | 0.3527        | 0.1436        | 0.2511        | 0.028        |
| P13  | 0.15362 (3)   | 0.36666 (2)   | 0.36171 (3)   | 0.02350 (11) |
| C141 | 0.03186 (13)  | 0.32676 (9)   | 0.32538 (11)  | 0.0282 (4)   |
| C142 | 0.00585 (16)  | 0.28784 (10)  | 0.37599 (13)  | 0.0401 (5)   |
| H142 | 0.0515        | 0.2815        | 0.4267        | 0.048        |
| C143 | -0.08570 (17) | 0.25837 (11)  | 0.35328 (16)  | 0.0480 (6)   |
| H143 | -0.1026       | 0.2329        | 0.3888        | 0.058        |
| C144 | -0.15214 (17) | 0.26597 (12)  | 0.27932 (16)  | 0.0499 (6)   |
| H144 | -0.215        | 0.2462        | 0.2641        | 0.06         |
| C145 | -0.12746 (15) | 0.30213 (12)  | 0.22750 (14)  | 0.0444 (5)   |
| H145 | -0.1731       | 0.306         | 0.1759        | 0.053        |
| C146 | -0.03624 (14) | 0.33300 (10)  | 0.25011 (12)  | 0.0333 (4)   |
| H146 | -0.0201       | 0.3585        | 0.2142        | 0.04         |
| C147 | 0.15325 (13)  | 0.46057 (9)   | 0.41722 (10)  | 0.0234 (4)   |
| C148 | 0.07427 (13)  | 0.49077 (10)  | 0.42003 (11)  | 0.0278 (4)   |
| H148 | 0.015         | 0.462         | 0.3923        | 0.033        |
| C149 | 0.08174 (15)  | 0.56323 (10)  | 0.46352 (11)  | 0.0337 (5)   |
| H149 | 0.0276        | 0.5835        | 0.4657        | 0.04         |
| C150 | 0.16728 (16)  | 0.60563 (10)  | 0.50338 (11)  | 0.0358 (5)   |
| H150 | 0.1717        | 0.6553        | 0.5321        | 0.043        |
| C151 | 0.24642 (15)  | 0.57635 (10)  | 0.50182 (11)  | 0.0340 (5)   |
| H151 | 0.3054        | 0.6055        | 0.5296        | 0.041        |
| C152 | 0.23951 (13)  | 0.50379 (10)  | 0.45936 (11)  | 0.0286 (4)   |
| H152 | 0.2942        | 0.4833        | 0.459         | 0.034        |
| C153 | 0.16022 (12)  | 0.39140 (9)   | 0.26869 (10)  | 0.0210 (4)   |
| C154 | 0.15109 (12)  | 0.46466 (9)   | 0.25146 (10)  | 0.0236 (4)   |
| H154 | 0.1374        | 0.502         | 0.287         | 0.028        |
| C155 | 0.16150 (13)  | 0.48384 (9)   | 0.18397 (11)  | 0.0267 (4)   |
| H155 | 0.1558        | 0.5341        | 0.174         | 0.032        |
| C156 | 0.18024 (13)  | 0.42997 (10)  | 0.13094 (11)  | 0.0287 (4)   |
| H156 | 0.1871        | 0.4426        | 0.0843        | 0.034        |
| C157 | 0.18885 (12)  | 0.35707 (10)  | 0.14717 (10)  | 0.0263 (4)   |
| H157 | 0.2013        | 0.3199        | 0.1107        | 0.032        |
| C158 | 0.17980 (11)  | 0.33681 (9)   | 0.21511 (10)  | 0.0200 (4)   |
| C159 | 0.19067 (12)  | 0.25558 (9)   | 0.22678 (10)  | 0.0215 (4)   |
| H15A | 0.1764        | 0.2473        | 0.2739        | 0.026        |
| H15B | 0.1458        | 0.2212        | 0.178         | 0.026        |

Anisotropic displacement parameters (Å<sup>2</sup>)

The anisotropic displacement factor exponent takes the form:

$$-2\pi^2 [ h^2 a^{*2} U_{11} + \dots + 2 h k a^* b^* U_{12} ].$$

| Atom | U11         | U22         | U33         | U23          | U13          | U12          |
|------|-------------|-------------|-------------|--------------|--------------|--------------|
| N1   | 0.0241 (8)  | 0.0188 (7)  | 0.0192 (7)  | -0.0014 (6)  | 0.0057 (6)   | 0.0022 (6)   |
| P1   | 0.0240 (3)  | 0.0289 (2)  | 0.0262 (2)  | 0.00779 (19) | 0.0104 (2)   | -0.0001 (2)  |
| C1   | 0.0292 (10) | 0.0298 (9)  | 0.0243 (9)  | 0.0110 (7)   | 0.0129 (8)   | 0.0051 (8)   |
| C2   | 0.0343 (11) | 0.0367 (10) | 0.0358 (11) | 0.0128 (9)   | 0.0200 (9)   | 0.0056 (9)   |
| C3   | 0.0494 (14) | 0.0480 (12) | 0.0418 (12) | 0.0120 (10)  | 0.0310 (11)  | 0.0165 (11)  |
| C4   | 0.0628 (16) | 0.0359 (11) | 0.0415 (12) | 0.0010 (9)   | 0.0275 (12)  | 0.0064 (11)  |
| C5   | 0.0543 (15) | 0.0392 (11) | 0.0494 (13) | -0.0021 (10) | 0.0268 (12)  | -0.0077 (11) |
| C6   | 0.0347 (12) | 0.0397 (11) | 0.0399 (11) | 0.0010 (9)   | 0.0217 (10)  | -0.0026 (9)  |
| C7   | 0.0312 (11) | 0.0282 (9)  | 0.0277 (9)  | 0.0086 (8)   | 0.0145 (8)   | 0.0021 (8)   |
| C8   | 0.0363 (12) | 0.0330 (10) | 0.0328 (10) | 0.0065 (8)   | 0.0108 (9)   | 0.0065 (9)   |
| C9   | 0.0375 (13) | 0.0465 (12) | 0.0366 (11) | 0.0075 (10)  | 0.0077 (10)  | 0.0106 (10)  |
| C10  | 0.0503 (14) | 0.0448 (12) | 0.0385 (12) | 0.0153 (10)  | 0.0235 (11)  | 0.0205 (11)  |
| C11  | 0.0628 (16) | 0.0319 (10) | 0.0399 (12) | 0.0052 (9)   | 0.0194 (11)  | 0.0133 (11)  |
| C12  | 0.0476 (14) | 0.0342 (10) | 0.0335 (11) | 0.0054 (9)   | 0.0070 (10)  | 0.0030 (10)  |
| C13  | 0.0254 (10) | 0.0202 (8)  | 0.0205 (8)  | 0.0004 (7)   | 0.0090 (7)   | -0.0011 (7)  |
| C14  | 0.0252 (10) | 0.0312 (9)  | 0.0268 (9)  | 0.0045 (8)   | 0.0103 (8)   | 0.0027 (8)   |
| C15  | 0.0275 (10) | 0.0357 (10) | 0.0304 (10) | -0.0016 (8)  | 0.0162 (8)   | -0.0011 (8)  |
| C16  | 0.0430 (12) | 0.0301 (9)  | 0.0264 (10) | 0.0031 (8)   | 0.0209 (9)   | -0.0022 (9)  |
| C17  | 0.0365 (11) | 0.0269 (9)  | 0.0210 (9)  | 0.0037 (7)   | 0.0115 (8)   | 0.0036 (8)   |
| C18  | 0.0260 (10) | 0.0196 (8)  | 0.0178 (8)  | -0.0023 (7)  | 0.0073 (7)   | 0.0002 (7)   |
| C19  | 0.0269 (10) | 0.0238 (8)  | 0.0190 (8)  | 0.0001 (7)   | 0.0065 (7)   | 0.0051 (7)   |
| P2   | 0.0226 (2)  | 0.0192 (2)  | 0.0252 (2)  | 0.00168 (17) | 0.01072 (19) | 0.00106 (18) |
| C21  | 0.0261 (10) | 0.0216 (8)  | 0.0235 (9)  | -0.0033 (7)  | 0.0065 (8)   | 0.0022 (7)   |
| C22  | 0.0360 (12) | 0.0328 (10) | 0.0397 (11) | 0.0112 (9)   | 0.0025 (9)   | -0.0037 (9)  |
| C23  | 0.0459 (14) | 0.0367 (11) | 0.0427 (12) | 0.0100 (10)  | -0.0022 (11) | 0.0071 (10)  |
| C24  | 0.0366 (13) | 0.0506 (12) | 0.0323 (11) | -0.0047 (10) | 0.0026 (10)  | 0.0214 (11)  |
| C25  | 0.0286 (12) | 0.0632 (14) | 0.0361 (11) | 0.0000 (11)  | 0.0146 (9)   | 0.0085 (10)  |
| C26  | 0.0282 (11) | 0.0404 (10) | 0.0300 (10) | 0.0059 (8)   | 0.0136 (8)   | 0.0089 (9)   |
| C27  | 0.0233 (9)  | 0.0187 (8)  | 0.0266 (9)  | 0.0027 (7)   | 0.0094 (8)   | 0.0022 (7)   |
| C28  | 0.0204 (10) | 0.0285 (9)  | 0.0375 (10) | -0.0005 (8)  | 0.0097 (8)   | 0.0014 (8)   |
| C29  | 0.0297 (11) | 0.0318 (10) | 0.0432 (12) | -0.0078 (9)  | 0.0106 (9)   | 0.0078 (9)   |
| C30  | 0.0302 (12) | 0.0310 (10) | 0.0504 (13) | -0.0153 (9)  | 0.0007 (10)  | 0.0028 (9)   |
| C31  | 0.0192 (10) | 0.0390 (11) | 0.0586 (14) | -0.0135 (10) | 0.0046 (10)  | 0.0002 (9)   |
| C32  | 0.0235 (10) | 0.0262 (9)  | 0.0439 (11) | -0.0028 (8)  | 0.0113 (9)   | 0.0051 (8)   |
| C33  | 0.0165 (9)  | 0.0203 (8)  | 0.0238 (8)  | 0.0019 (7)   | 0.0099 (7)   | 0.0041 (7)   |
| C34  | 0.0237 (10) | 0.0217 (8)  | 0.0248 (9)  | -0.0022 (7)  | 0.0091 (8)   | 0.0018 (7)   |
| C35  | 0.0296 (10) | 0.0314 (9)  | 0.0202 (9)  | 0.0007 (7)   | 0.0099 (8)   | 0.0043 (8)   |
| C36  | 0.0301 (10) | 0.0290 (9)  | 0.0275 (9)  | 0.0066 (8)   | 0.0147 (8)   | 0.0034 (8)   |
| C37  | 0.0288 (10) | 0.0219 (8)  | 0.0269 (9)  | -0.0001 (7)  | 0.0130 (8)   | -0.0016 (7)  |
| C38  | 0.0235 (9)  | 0.0206 (8)  | 0.0213 (8)  | 0.0008 (7)   | 0.0094 (7)   | 0.0029 (7)   |
| C39  | 0.0330 (11) | 0.0206 (8)  | 0.0226 (9)  | 0.0005 (7)   | 0.0103 (8)   | 0.0014 (8)   |
| P3   | 0.0249 (3)  | 0.0238 (2)  | 0.0212 (2)  | 0.00716 (18) | 0.01047 (19) | 0.00572 (19) |
| C41  | 0.0287 (10) | 0.0246 (8)  | 0.0210 (8)  | 0.0088 (7)   | 0.0124 (8)   | 0.0038 (7)   |

|      |             |             |             |              |              |              |
|------|-------------|-------------|-------------|--------------|--------------|--------------|
| C42  | 0.0318 (11) | 0.0287 (9)  | 0.0314 (10) | 0.0055 (8)   | 0.0135 (9)   | 0.0067 (8)   |
| C43  | 0.0461 (13) | 0.0290 (10) | 0.0452 (12) | 0.0063 (9)   | 0.0267 (10)  | 0.0110 (9)   |
| C44  | 0.0565 (15) | 0.0231 (9)  | 0.0382 (11) | 0.0013 (8)   | 0.0236 (11)  | -0.0014 (9)  |
| C45  | 0.0385 (12) | 0.0335 (10) | 0.0339 (11) | 0.0027 (8)   | 0.0138 (9)   | -0.0079 (9)  |
| C46  | 0.0287 (10) | 0.0320 (9)  | 0.0283 (10) | 0.0079 (8)   | 0.0140 (8)   | 0.0014 (8)   |
| C47  | 0.0275 (10) | 0.0194 (8)  | 0.0240 (9)  | 0.0051 (7)   | 0.0129 (8)   | 0.0041 (7)   |
| C48  | 0.0302 (10) | 0.0223 (8)  | 0.0242 (9)  | 0.0063 (7)   | 0.0134 (8)   | 0.0045 (8)   |
| C49  | 0.0294 (10) | 0.0277 (9)  | 0.0262 (9)  | 0.0047 (8)   | 0.0083 (8)   | 0.0048 (8)   |
| C50  | 0.0261 (10) | 0.0315 (10) | 0.0420 (11) | 0.0055 (9)   | 0.0137 (9)   | -0.0015 (8)  |
| C51  | 0.0388 (12) | 0.0408 (11) | 0.0471 (12) | 0.0219 (10)  | 0.0209 (10)  | -0.0014 (10) |
| C52  | 0.0344 (12) | 0.0390 (10) | 0.0335 (10) | 0.0179 (9)   | 0.0133 (9)   | 0.0029 (9)   |
| C53  | 0.0187 (9)  | 0.0285 (9)  | 0.0225 (9)  | 0.0089 (7)   | 0.0090 (7)   | 0.0058 (7)   |
| C54  | 0.0319 (11) | 0.0278 (9)  | 0.0266 (9)  | 0.0103 (7)   | 0.0152 (8)   | 0.0094 (8)   |
| C55  | 0.0396 (12) | 0.0318 (10) | 0.0399 (11) | 0.0178 (9)   | 0.0203 (10)  | 0.0128 (9)   |
| C56  | 0.0461 (13) | 0.0480 (12) | 0.0355 (11) | 0.0242 (9)   | 0.0260 (10)  | 0.0176 (10)  |
| C57  | 0.0407 (12) | 0.0436 (11) | 0.0239 (9)  | 0.0112 (8)   | 0.0180 (9)   | 0.0162 (9)   |
| C58  | 0.0186 (9)  | 0.0299 (9)  | 0.0203 (8)  | 0.0050 (7)   | 0.0062 (7)   | 0.0055 (7)   |
| C59  | 0.0257 (10) | 0.0278 (9)  | 0.0222 (9)  | -0.0005 (7)  | 0.0079 (8)   | -0.0012 (8)  |
| N11  | 0.0206 (8)  | 0.0187 (6)  | 0.0212 (7)  | 0.0013 (6)   | 0.0062 (6)   | 0.0041 (6)   |
| P11  | 0.0185 (2)  | 0.0305 (2)  | 0.0231 (2)  | 0.00537 (19) | 0.00879 (19) | 0.00165 (19) |
| C101 | 0.0290 (10) | 0.0294 (9)  | 0.0206 (8)  | 0.0088 (7)   | 0.0131 (8)   | 0.0042 (8)   |
| C102 | 0.0331 (11) | 0.0396 (10) | 0.0312 (10) | 0.0085 (8)   | 0.0175 (9)   | 0.0084 (9)   |
| C103 | 0.0561 (15) | 0.0403 (11) | 0.0403 (12) | 0.0089 (10)  | 0.0258 (11)  | 0.0187 (11)  |
| C104 | 0.0694 (17) | 0.0299 (10) | 0.0370 (12) | 0.0033 (9)   | 0.0250 (12)  | 0.0031 (11)  |
| C105 | 0.0452 (13) | 0.0383 (11) | 0.0331 (11) | 0.0033 (9)   | 0.0176 (10)  | -0.0106 (10) |
| C106 | 0.0302 (11) | 0.0364 (10) | 0.0267 (9)  | 0.0068 (8)   | 0.0142 (8)   | 0.0006 (8)   |
| C107 | 0.0212 (9)  | 0.0292 (9)  | 0.0262 (9)  | 0.0080 (7)   | 0.0102 (8)   | 0.0006 (7)   |
| C108 | 0.0426 (12) | 0.0286 (9)  | 0.0266 (10) | 0.0066 (8)   | 0.0111 (9)   | 0.0030 (9)   |
| C109 | 0.0477 (13) | 0.0385 (11) | 0.0276 (10) | 0.0129 (9)   | 0.0045 (9)   | 0.0026 (10)  |
| C110 | 0.0334 (12) | 0.0350 (10) | 0.0447 (12) | 0.0171 (9)   | 0.0127 (10)  | 0.0071 (9)   |
| C111 | 0.0382 (12) | 0.0345 (10) | 0.0433 (12) | 0.0091 (9)   | 0.0189 (10)  | 0.0117 (9)   |
| C112 | 0.0344 (11) | 0.0373 (10) | 0.0273 (10) | 0.0043 (8)   | 0.0124 (9)   | 0.0061 (9)   |
| C113 | 0.0211 (9)  | 0.0244 (8)  | 0.0202 (8)  | 0.0000 (7)   | 0.0075 (7)   | -0.0005 (7)  |
| C114 | 0.0203 (9)  | 0.0361 (10) | 0.0250 (9)  | 0.0034 (8)   | 0.0082 (8)   | 0.0020 (8)   |
| C115 | 0.0208 (10) | 0.0447 (11) | 0.0341 (10) | -0.0038 (9)  | 0.0136 (8)   | -0.0025 (8)  |
| C116 | 0.0344 (12) | 0.0483 (12) | 0.0288 (10) | 0.0041 (9)   | 0.0182 (9)   | -0.0040 (9)  |
| C117 | 0.0340 (11) | 0.0387 (10) | 0.0224 (9)  | 0.0073 (8)   | 0.0104 (8)   | 0.0032 (9)   |
| C118 | 0.0224 (9)  | 0.0236 (8)  | 0.0188 (8)  | -0.0011 (7)  | 0.0061 (7)   | 0.0008 (7)   |
| C119 | 0.0235 (9)  | 0.0279 (9)  | 0.0177 (8)  | 0.0010 (7)   | 0.0057 (7)   | 0.0051 (7)   |
| P12  | 0.0225 (2)  | 0.0200 (2)  | 0.0231 (2)  | 0.00567 (17) | 0.00685 (19) | 0.00351 (18) |
| C121 | 0.0259 (10) | 0.0221 (8)  | 0.0209 (8)  | -0.0005 (7)  | 0.0079 (7)   | -0.0016 (7)  |
| C122 | 0.0379 (12) | 0.0296 (9)  | 0.0239 (9)  | 0.0050 (8)   | 0.0127 (9)   | 0.0003 (8)   |
| C123 | 0.0450 (13) | 0.0438 (11) | 0.0279 (10) | 0.0034 (9)   | 0.0208 (10)  | -0.0074 (10) |
| C124 | 0.0344 (12) | 0.0459 (12) | 0.0357 (11) | -0.0056 (9)  | 0.0210 (10)  | -0.0025 (10) |
| C125 | 0.0301 (11) | 0.0330 (10) | 0.0432 (12) | 0.0027 (9)   | 0.0171 (9)   | 0.0056 (9)   |
| C126 | 0.0289 (10) | 0.0255 (9)  | 0.0316 (10) | 0.0055 (8)   | 0.0137 (8)   | 0.0010 (8)   |
| C127 | 0.0246 (9)  | 0.0182 (8)  | 0.0246 (9)  | 0.0085 (7)   | 0.0090 (7)   | 0.0042 (7)   |
| C128 | 0.0285 (10) | 0.0244 (9)  | 0.0401 (11) | 0.0069 (8)   | 0.0167 (9)   | 0.0042 (8)   |
| C129 | 0.0406 (12) | 0.0255 (9)  | 0.0424 (11) | 0.0032 (8)   | 0.0225 (10)  | 0.0071 (9)   |
| C130 | 0.0447 (12) | 0.0222 (9)  | 0.0270 (10) | 0.0021 (7)   | 0.0123 (9)   | 0.0013 (8)   |
| C131 | 0.0267 (10) | 0.0278 (9)  | 0.0255 (9)  | 0.0078 (7)   | 0.0054 (8)   | -0.0004 (8)  |
| C132 | 0.0263 (10) | 0.0239 (8)  | 0.0243 (9)  | 0.0084 (7)   | 0.0088 (8)   | 0.0072 (7)   |
| C133 | 0.0181 (9)  | 0.0200 (8)  | 0.0242 (9)  | 0.0045 (7)   | 0.0086 (7)   | 0.0067 (7)   |
| C134 | 0.0228 (9)  | 0.0202 (8)  | 0.0264 (9)  | 0.0029 (7)   | 0.0075 (8)   | 0.0036 (7)   |
| C135 | 0.0298 (10) | 0.0273 (9)  | 0.0203 (8)  | 0.0033 (7)   | 0.0106 (8)   | 0.0070 (8)   |
| C136 | 0.0384 (11) | 0.0272 (9)  | 0.0284 (10) | 0.0079 (8)   | 0.0197 (9)   | 0.0034 (8)   |
| C137 | 0.0333 (11) | 0.0210 (8)  | 0.0293 (9)  | 0.0024 (7)   | 0.0164 (8)   | -0.0011 (8)  |
| C138 | 0.0205 (9)  | 0.0212 (8)  | 0.0231 (8)  | 0.0022 (7)   | 0.0103 (7)   | 0.0049 (7)   |

|      |             |             |             |              |             |              |
|------|-------------|-------------|-------------|--------------|-------------|--------------|
| C139 | 0.0244 (9)  | 0.0200 (8)  | 0.0242 (9)  | 0.0020 (7)   | 0.0093 (7)  | 0.0042 (7)   |
| P13  | 0.0296 (3)  | 0.0220 (2)  | 0.0239 (2)  | 0.00783 (18) | 0.0141 (2)  | 0.00749 (19) |
| C141 | 0.0365 (11) | 0.0190 (8)  | 0.0358 (10) | 0.0015 (7)   | 0.0227 (9)  | 0.0040 (8)   |
| C142 | 0.0512 (14) | 0.0315 (10) | 0.0486 (13) | 0.0103 (9)   | 0.0305 (11) | 0.0053 (10)  |
| C143 | 0.0622 (16) | 0.0327 (11) | 0.0700 (17) | 0.0032 (11)  | 0.0518 (15) | -0.0037 (11) |
| C144 | 0.0445 (14) | 0.0443 (12) | 0.0651 (16) | -0.0177 (12) | 0.0381 (13) | -0.0124 (11) |
| C145 | 0.0358 (12) | 0.0509 (13) | 0.0435 (12) | -0.0106 (10) | 0.0207 (10) | -0.0073 (10) |
| C146 | 0.0327 (11) | 0.0342 (10) | 0.0329 (10) | -0.0032 (8)  | 0.0168 (9)  | -0.0021 (9)  |
| C147 | 0.0312 (10) | 0.0244 (8)  | 0.0192 (8)  | 0.0079 (7)   | 0.0132 (8)  | 0.0058 (8)   |
| C148 | 0.0309 (11) | 0.0277 (9)  | 0.0254 (9)  | 0.0054 (7)   | 0.0110 (8)  | 0.0078 (8)   |
| C149 | 0.0463 (13) | 0.0300 (9)  | 0.0314 (10) | 0.0087 (8)   | 0.0203 (10) | 0.0150 (9)   |
| C150 | 0.0594 (15) | 0.0239 (9)  | 0.0285 (10) | 0.0056 (8)   | 0.0220 (10) | 0.0043 (9)   |
| C151 | 0.0443 (13) | 0.0314 (10) | 0.0280 (10) | 0.0040 (8)   | 0.0176 (9)  | -0.0053 (9)  |
| C152 | 0.0312 (11) | 0.0324 (9)  | 0.0268 (9)  | 0.0079 (8)   | 0.0156 (8)  | 0.0028 (8)   |
| C153 | 0.0185 (9)  | 0.0236 (8)  | 0.0213 (8)  | 0.0056 (7)   | 0.0076 (7)  | 0.0037 (7)   |
| C154 | 0.0264 (10) | 0.0225 (8)  | 0.0251 (9)  | 0.0062 (7)   | 0.0123 (8)  | 0.0074 (7)   |
| C155 | 0.0299 (10) | 0.0226 (8)  | 0.0295 (9)  | 0.0103 (7)   | 0.0114 (8)  | 0.0054 (8)   |
| C156 | 0.0313 (11) | 0.0342 (10) | 0.0249 (9)  | 0.0118 (8)   | 0.0134 (8)  | 0.0052 (8)   |
| C157 | 0.0269 (10) | 0.0295 (9)  | 0.0231 (9)  | 0.0029 (7)   | 0.0112 (8)  | 0.0053 (8)   |
| C158 | 0.0133 (8)  | 0.0222 (8)  | 0.0214 (8)  | 0.0035 (7)   | 0.0036 (7)  | 0.0018 (7)   |
| C159 | 0.0199 (9)  | 0.0218 (8)  | 0.0217 (8)  | 0.0029 (7)   | 0.0072 (7)  | 0.0023 (7)   |

#### Bond lengths [Å]

|     |       |               |
|-----|-------|---------------|
| N1  | - C59 | = 1.461 (2)   |
| N1  | - C39 | = 1.469 (2)   |
| N1  | - C19 | = 1.473 (2)   |
| P1  | - C7  | = 1.8322 (19) |
| P1  | - C1  | = 1.8424 (18) |
| P1  | - C13 | = 1.8463 (18) |
| C1  | - C2  | = 1.389 (3)   |
| C1  | - C6  | = 1.390 (3)   |
| C2  | - C3  | = 1.385 (3)   |
| C2  | - H2  | = 0.95        |
| C3  | - C4  | = 1.366 (3)   |
| C3  | - H3  | = 0.95        |
| C4  | - C5  | = 1.381 (3)   |
| C4  | - H4  | = 0.95        |
| C5  | - C6  | = 1.389 (3)   |
| C5  | - H5  | = 0.95        |
| C6  | - H6  | = 0.95        |
| C7  | - C8  | = 1.390 (3)   |
| C7  | - C12 | = 1.392 (3)   |
| C8  | - C9  | = 1.390 (3)   |
| C8  | - H8  | = 0.95        |
| C9  | - C10 | = 1.375 (3)   |
| C9  | - H9  | = 0.95        |
| C10 | - C11 | = 1.372 (3)   |
| C10 | - H10 | = 0.95        |
| C11 | - C12 | = 1.385 (3)   |
| C11 | - H11 | = 0.95        |
| C12 | - H12 | = 0.95        |
| C13 | - C14 | = 1.398 (2)   |
| C13 | - C18 | = 1.405 (2)   |
| C14 | - C15 | = 1.384 (3)   |
| C14 | - H14 | = 0.95        |
| C15 | - C16 | = 1.379 (3)   |

C15 - H15 = 0.95  
C16 - C17 = 1.382(3)  
C16 - H16 = 0.95  
C17 - C18 = 1.396(2)  
C17 - H17 = 0.95  
C18 - C19 = 1.507(2)  
C19 - H19A = 0.99  
C19 - H19B = 0.99  
P2 - C27 = 1.8336(16)  
P2 - C33 = 1.8342(17)  
P2 - C21 = 1.8347(18)  
C21 - C26 = 1.388(3)  
C21 - C22 = 1.400(3)  
C22 - C23 = 1.375(3)  
C22 - H22 = 0.95  
C23 - C24 = 1.379(3)  
C23 - H23 = 0.95  
C24 - C25 = 1.377(3)  
C24 - H24 = 0.95  
C25 - C26 = 1.390(3)  
C25 - H25 = 0.95  
C26 - H26 = 0.95  
C27 - C28 = 1.389(2)  
C27 - C32 = 1.389(2)  
C28 - C29 = 1.384(2)  
C28 - H28 = 0.95  
C29 - C30 = 1.380(3)  
C29 - H29 = 0.95  
C30 - C31 = 1.380(3)  
C30 - H30 = 0.95  
C31 - C32 = 1.388(3)  
C31 - H31 = 0.95  
C32 - H32 = 0.95  
C33 - C34 = 1.404(2)  
C33 - C38 = 1.414(2)  
C34 - C35 = 1.385(2)  
C34 - H34 = 0.95  
C35 - C36 = 1.380(2)  
C35 - H35 = 0.95  
C36 - C37 = 1.388(2)  
C36 - H36 = 0.95  
C37 - C38 = 1.389(2)  
C37 - H37 = 0.95  
C38 - C39 = 1.518(2)  
C39 - H39A = 0.99  
C39 - H39B = 0.99  
P3 - C41 = 1.8288(17)  
P3 - C47 = 1.8352(18)  
P3 - C53 = 1.8430(17)  
C41 - C42 = 1.389(2)  
C41 - C46 = 1.394(2)  
C42 - C43 = 1.395(2)  
C42 - H42 = 0.95  
C43 - C44 = 1.372(3)  
C43 - H43 = 0.95  
C44 - C45 = 1.387(3)  
C44 - H44 = 0.95  
C45 - C46 = 1.388(2)



C45 - H45 = 0.95  
C46 - H46 = 0.95  
C47 - C48 = 1.394(2)  
C47 - C52 = 1.398(2)  
C48 - C49 = 1.382(2)  
C48 - H48 = 0.95  
C49 - C50 = 1.379(3)  
C49 - H49 = 0.95  
C50 - C51 = 1.390(3)  
C50 - H50 = 0.95  
C51 - C52 = 1.378(3)  
C51 - H51 = 0.95  
C52 - H52 = 0.95  
C53 - C54 = 1.401(2)  
C53 - C58 = 1.405(2)  
C54 - C55 = 1.384(3)  
C54 - H54 = 0.95  
C55 - C56 = 1.382(3)  
C55 - H55 = 0.95  
C56 - C57 = 1.380(3)  
C56 - H56 = 0.95  
C57 - C58 = 1.390(3)  
C57 - H57 = 0.95  
C58 - C59 = 1.513(2)  
C59 - H59A = 0.99  
C59 - H59B = 0.99  
N11 - C159 = 1.464(2)  
N11 - C119 = 1.468(2)  
N11 - C139 = 1.4732(19)  
P11 - C107 = 1.8294(18)  
P11 - C101 = 1.8459(17)  
P11 - C113 = 1.8462(18)  
C101 - C106 = 1.391(2)  
C101 - C102 = 1.392(3)  
C102 - C103 = 1.393(3)  
C102 - H102 = 0.95  
C103 - C104 = 1.374(3)  
C103 - H103 = 0.95  
C104 - C105 = 1.382(3)  
C104 - H104 = 0.95  
C105 - C106 = 1.388(3)  
C105 - H105 = 0.95  
C106 - H106 = 0.95  
C107 - C112 = 1.393(2)  
C107 - C108 = 1.393(2)  
C108 - C109 = 1.383(3)  
C108 - H108 = 0.95  
C109 - C110 = 1.376(3)  
C109 - H109 = 0.95  
C110 - C111 = 1.379(3)  
C110 - H110 = 0.95  
C111 - C112 = 1.383(3)  
C111 - H111 = 0.95  
C112 - H112 = 0.95  
C113 - C114 = 1.396(2)  
C113 - C118 = 1.405(2)  
C114 - C115 = 1.384(3)  
C114 - H114 = 0.95

C115 - C116 = 1.385(3)  
C115 - H115 = 0.95  
C116 - C117 = 1.379(3)  
C116 - H116 = 0.95  
C117 - C118 = 1.395(3)  
C117 - H117 = 0.95  
C118 - C119 = 1.508(2)  
C119 - H11A = 0.99  
C119 - H11B = 0.99  
P12 - C121 = 1.8306(18)  
P12 - C127 = 1.8383(16)  
P12 - C133 = 1.8427(17)  
C121 - C126 = 1.392(2)  
C121 - C122 = 1.407(2)  
C122 - C123 = 1.380(3)  
C122 - H122 = 0.95  
C123 - C124 = 1.379(3)  
C123 - H123 = 0.95  
C124 - C125 = 1.380(3)  
C124 - H124 = 0.95  
C125 - C126 = 1.385(3)  
C125 - H125 = 0.95  
C126 - H126 = 0.95  
C127 - C132 = 1.390(2)  
C127 - C128 = 1.395(2)  
C128 - C129 = 1.388(2)  
C128 - H128 = 0.95  
C129 - C130 = 1.381(3)  
C129 - H129 = 0.95  
C130 - C131 = 1.375(3)  
C130 - H130 = 0.95  
C131 - C132 = 1.390(2)  
C131 - H131 = 0.95  
C132 - H132 = 0.95  
C133 - C134 = 1.402(2)  
C133 - C138 = 1.411(2)  
C134 - C135 = 1.387(2)  
C134 - H134 = 0.95  
C135 - C136 = 1.378(2)  
C135 - H135 = 0.95  
C136 - C137 = 1.389(2)  
C136 - H136 = 0.95  
C137 - C138 = 1.393(2)  
C137 - H137 = 0.95  
C138 - C139 = 1.523(2)  
C139 - H13A = 0.99  
C139 - H13B = 0.99  
P13 - C141 = 1.833(2)  
P13 - C147 = 1.8359(17)  
P13 - C153 = 1.8443(17)  
C141 - C142 = 1.396(3)  
C141 - C146 = 1.397(3)  
C142 - C143 = 1.386(3)  
C142 - H142 = 0.95  
C143 - C144 = 1.377(3)  
C143 - H143 = 0.95  
C144 - C145 = 1.375(3)  
C144 - H144 = 0.95

C145 - C146 = 1.389(3)  
C145 - H145 = 0.95  
C146 - H146 = 0.95  
C147 - C148 = 1.390(2)  
C147 - C152 = 1.397(2)  
C148 - C149 = 1.395(2)  
C148 - H148 = 0.95  
C149 - C150 = 1.379(3)  
C149 - H149 = 0.95  
C150 - C151 = 1.378(3)  
C150 - H150 = 0.95  
C151 - C152 = 1.391(2)  
C151 - H151 = 0.95  
C152 - H152 = 0.95  
C153 - C154 = 1.401(2)  
C153 - C158 = 1.406(2)  
C154 - C155 = 1.384(2)  
C154 - H154 = 0.95  
C155 - C156 = 1.384(2)  
C155 - H155 = 0.95  
C156 - C157 = 1.388(2)  
C156 - H156 = 0.95  
C157 - C158 = 1.389(2)  
C157 - H157 = 0.95  
C158 - C159 = 1.516(2)  
C159 - H15A = 0.99  
C159 - H15B = 0.99

#### Angles [°]

C59 - N1 - C39 = 110.94(13)  
C59 - N1 - C19 = 111.06(13)  
C39 - N1 - C19 = 112.22(13)  
C7 - P1 - C1 = 105.19(8)  
C7 - P1 - C13 = 100.48(8)  
C1 - P1 - C13 = 99.40(8)  
C2 - C1 - C6 = 117.82(17)  
C2 - C1 - P1 = 117.40(14)  
C6 - C1 - P1 = 124.73(14)  
C3 - C2 - C1 = 121.13(19)  
C3 - C2 - H2 = 119.4  
C1 - C2 - H2 = 119.4  
C4 - C3 - C2 = 120.33(19)  
C4 - C3 - H3 = 119.8  
C2 - C3 - H3 = 119.8  
C3 - C4 - C5 = 119.83(19)  
C3 - C4 - H4 = 120.1  
C5 - C4 - H4 = 120.1  
C4 - C5 - C6 = 119.9(2)  
C4 - C5 - H5 = 120  
C6 - C5 - H5 = 120  
C5 - C6 - C1 = 120.93(19)  
C5 - C6 - H6 = 119.5  
C1 - C6 - H6 = 119.5  
C8 - C7 - C12 = 118.16(18)

C8 - C7 - P1 = 126.84 (14)  
C12 - C7 - P1 = 114.97 (14)  
C7 - C8 - C9 = 120.45 (18)  
C7 - C8 - H8 = 119.8  
C9 - C8 - H8 = 119.8  
C10 - C9 - C8 = 120.3 (2)  
C10 - C9 - H9 = 119.9  
C8 - C9 - H9 = 119.9  
C11 - C10 - C9 = 120.1 (2)  
C11 - C10 - H10 = 120  
C9 - C10 - H10 = 120  
C10 - C11 - C12 = 119.84 (19)  
C10 - C11 - H11 = 120.1  
C12 - C11 - H11 = 120.1  
C11 - C12 - C7 = 121.15 (19)  
C11 - C12 - H12 = 119.4  
C7 - C12 - H12 = 119.4  
C14 - C13 - C18 = 118.61 (16)  
C14 - C13 - P1 = 122.84 (13)  
C18 - C13 - P1 = 118.55 (13)  
C15 - C14 - C13 = 121.10 (17)  
C15 - C14 - H14 = 119.4  
C13 - C14 - H14 = 119.4  
C16 - C15 - C14 = 120.16 (18)  
C16 - C15 - H15 = 119.9  
C14 - C15 - H15 = 119.9  
C15 - C16 - C17 = 119.49 (17)  
C15 - C16 - H16 = 120.3  
C17 - C16 - H16 = 120.3  
C16 - C17 - C18 = 121.34 (17)  
C16 - C17 - H17 = 119.3  
C18 - C17 - H17 = 119.3  
C17 - C18 - C13 = 119.11 (17)  
C17 - C18 - C19 = 118.24 (15)  
C13 - C18 - C19 = 122.63 (16)  
N1 - C19 - C18 = 110.25 (13)  
N1 - C19 - H19A = 109.6  
C18 - C19 - H19A = 109.6  
N1 - C19 - H19B = 109.6  
C18 - C19 - H19B = 109.6  
H19A - C19 - H19B = 108.1  
C27 - P2 - C33 = 101.19 (7)  
C27 - P2 - C21 = 102.19 (7)  
C33 - P2 - C21 = 102.38 (8)  
C26 - C21 - C22 = 117.90 (17)  
C26 - C21 - P2 = 125.19 (14)  
C22 - C21 - P2 = 116.83 (15)  
C23 - C22 - C21 = 121.4 (2)  
C23 - C22 - H22 = 119.3  
C21 - C22 - H22 = 119.3  
C22 - C23 - C24 = 120.1 (2)  
C22 - C23 - H23 = 119.9  
C24 - C23 - H23 = 119.9  
C25 - C24 - C23 = 119.4 (2)  
C25 - C24 - H24 = 120.3  
C23 - C24 - H24 = 120.3  
C24 - C25 - C26 = 120.9 (2)  
C24 - C25 - H25 = 119.6

C26 - C25 - H25 = 119.6  
C21 - C26 - C25 = 120.28 (19)  
C21 - C26 - H26 = 119.9  
C25 - C26 - H26 = 119.9  
C28 - C27 - C32 = 118.40 (15)  
C28 - C27 - P2 = 124.29 (13)  
C32 - C27 - P2 = 117.26 (13)  
C29 - C28 - C27 = 120.73 (17)  
C29 - C28 - H28 = 119.6  
C27 - C28 - H28 = 119.6  
C30 - C29 - C28 = 120.28 (18)  
C30 - C29 - H29 = 119.9  
C28 - C29 - H29 = 119.9  
C29 - C30 - C31 = 119.76 (17)  
C29 - C30 - H30 = 120.1  
C31 - C30 - H30 = 120.1  
C30 - C31 - C32 = 119.91 (18)  
C30 - C31 - H31 = 120  
C32 - C31 - H31 = 120  
C31 - C32 - C27 = 120.90 (17)  
C31 - C32 - H32 = 119.6  
C27 - C32 - H32 = 119.6  
C34 - C33 - C38 = 118.25 (15)  
C34 - C33 - P2 = 122.65 (12)  
C38 - C33 - P2 = 119.03 (12)  
C35 - C34 - C33 = 121.53 (15)  
C35 - C34 - H34 = 119.2  
C33 - C34 - H34 = 119.2  
C36 - C35 - C34 = 119.82 (16)  
C36 - C35 - H35 = 120.1  
C34 - C35 - H35 = 120.1  
C35 - C36 - C37 = 119.56 (17)  
C35 - C36 - H36 = 120.2  
C37 - C36 - H36 = 120.2  
C36 - C37 - C38 = 121.68 (15)  
C36 - C37 - H37 = 119.2  
C38 - C37 - H37 = 119.2  
C37 - C38 - C33 = 119.07 (15)  
C37 - C38 - C39 = 119.77 (14)  
C33 - C38 - C39 = 121.13 (15)  
N1 - C39 - C38 = 111.65 (14)  
N1 - C39 - H39A = 109.3  
C38 - C39 - H39A = 109.3  
N1 - C39 - H39B = 109.3  
C38 - C39 - H39B = 109.3  
H39A - C39 - H39B = 108  
C41 - P3 - C47 = 102.66 (8)  
C41 - P3 - C53 = 101.00 (8)  
C47 - P3 - C53 = 101.27 (8)  
C42 - C41 - C46 = 118.62 (16)  
C42 - C41 - P3 = 124.51 (14)  
C46 - C41 - P3 = 116.84 (13)  
C41 - C42 - C43 = 120.34 (18)  
C41 - C42 - H42 = 119.8  
C43 - C42 - H42 = 119.8  
C44 - C43 - C42 = 120.32 (19)  
C44 - C43 - H43 = 119.8  
C42 - C43 - H43 = 119.8

C43 - C44 - C45 = 120.17 (17)

C43 - C44 - H44 = 119.9

C45 - C44 - H44 = 119.9

C44 - C45 - C46 = 119.59 (19)

C44 - C45 - H45 = 120.2

C46 - C45 - H45 = 120.2

C45 - C46 - C41 = 120.94 (18)

C45 - C46 - H46 = 119.5

C41 - C46 - H46 = 119.5

C48 - C47 - C52 = 118.17 (17)

C48 - C47 - P3 = 124.40 (13)

C52 - C47 - P3 = 117.43 (14)

C49 - C48 - C47 = 120.68 (16)

C49 - C48 - H48 = 119.7

C47 - C48 - H48 = 119.7

C50 - C49 - C48 = 120.62 (17)

C50 - C49 - H49 = 119.7

C48 - C49 - H49 = 119.7

C49 - C50 - C51 = 119.38 (18)

C49 - C50 - H50 = 120.3

C51 - C50 - H50 = 120.3

C52 - C51 - C50 = 120.18 (18)

C52 - C51 - H51 = 119.9

C50 - C51 - H51 = 119.9

C51 - C52 - C47 = 120.97 (18)

C51 - C52 - H52 = 119.5

C47 - C52 - H52 = 119.5

C54 - C53 - C58 = 118.27 (16)

C54 - C53 - P3 = 122.76 (13)

C58 - C53 - P3 = 118.93 (13)

C55 - C54 - C53 = 121.29 (16)

C55 - C54 - H54 = 119.4

C53 - C54 - H54 = 119.4

C56 - C55 - C54 = 120.04 (17)

C56 - C55 - H55 = 120

C54 - C55 - H55 = 120

C57 - C56 - C55 = 119.45 (18)

C57 - C56 - H56 = 120.3

C55 - C56 - H56 = 120.3

C56 - C57 - C58 = 121.48 (17)

C56 - C57 - H57 = 119.3

C58 - C57 - H57 = 119.3

C57 - C58 - C53 = 119.46 (16)

C57 - C58 - C59 = 117.58 (15)

C53 - C58 - C59 = 122.95 (15)

N1 - C59 - C58 = 110.41 (14)

N1 - C59 - H59A = 109.6

C58 - C59 - H59A = 109.6

N1 - C59 - H59B = 109.6

C58 - C59 - H59B = 109.6

H59A - C59 - H59B = 108.1

C159 - N11 - C119 = 110.38 (13)

C159 - N11 - C139 = 110.73 (13)

C119 - N11 - C139 = 112.32 (13)

C107 - P11 - C101 = 104.76 (8)

C107 - P11 - C113 = 103.34 (8)

C101 - P11 - C113 = 97.55 (7)

C106 - C101 - C102 = 118.39 (16)

C106 - C101 - P11 = 123.78(14)  
C102 - C101 - P11 = 117.71(14)  
C101 - C102 - C103 = 120.60(19)  
C101 - C102 - H102 = 119.7  
C103 - C102 - H102 = 119.7  
C104 - C103 - C102 = 120.0(2)  
C104 - C103 - H103 = 120  
C102 - C103 - H103 = 120  
C103 - C104 - C105 = 120.27(19)  
C103 - C104 - H104 = 119.9  
C105 - C104 - H104 = 119.9  
C104 - C105 - C106 = 119.7(2)  
C104 - C105 - H105 = 120.2  
C106 - C105 - H105 = 120.2  
C105 - C106 - C101 = 121.00(18)  
C105 - C106 - H106 = 119.5  
C101 - C106 - H106 = 119.5  
C112 - C107 - C108 = 117.72(17)  
C112 - C107 - P11 = 118.45(14)  
C108 - C107 - P11 = 123.04(14)  
C109 - C108 - C107 = 120.85(17)  
C109 - C108 - H108 = 119.6  
C107 - C108 - H108 = 119.6  
C110 - C109 - C108 = 120.65(18)  
C110 - C109 - H109 = 119.7  
C108 - C109 - H109 = 119.7  
C109 - C110 - C111 = 119.31(18)  
C109 - C110 - H110 = 120.3  
C111 - C110 - H110 = 120.3  
C110 - C111 - C112 = 120.35(18)  
C110 - C111 - H111 = 119.8  
C112 - C111 - H111 = 119.8  
C111 - C112 - C107 = 121.10(18)  
C111 - C112 - H112 = 119.4  
C107 - C112 - H112 = 119.4  
C114 - C113 - C118 = 118.81(16)  
C114 - C113 - P11 = 122.87(13)  
C118 - C113 - P11 = 118.29(13)  
C115 - C114 - C113 = 121.22(17)  
C115 - C114 - H114 = 119.4  
C113 - C114 - H114 = 119.4  
C114 - C115 - C116 = 119.96(18)  
C114 - C115 - H115 = 120  
C116 - C115 - H115 = 120  
C117 - C116 - C115 = 119.41(18)  
C117 - C116 - H116 = 120.3  
C115 - C116 - H116 = 120.3  
C116 - C117 - C118 = 121.64(17)  
C116 - C117 - H117 = 119.2  
C118 - C117 - H117 = 119.2  
C117 - C118 - C113 = 118.93(17)  
C117 - C118 - C119 = 118.89(15)  
C113 - C118 - C119 = 122.17(16)  
N11 - C119 - C118 = 111.60(13)  
N11 - C119 - H11A = 109.3  
C118 - C119 - H11A = 109.3  
N11 - C119 - H11B = 109.3  
C118 - C119 - H11B = 109.3

H11A - C119 - H11B = 108  
C121 - P12 - C127 = 101.54(8)  
C121 - P12 - C133 = 104.36(8)  
C127 - P12 - C133 = 101.08(7)  
C126 - C121 - C122 = 118.10(17)  
C126 - C121 - P12 = 124.19(14)  
C122 - C121 - P12 = 117.67(13)  
C123 - C122 - C121 = 120.61(18)  
C123 - C122 - H122 = 119.7  
C121 - C122 - H122 = 119.7  
C124 - C123 - C122 = 120.49(19)  
C124 - C123 - H123 = 119.8  
C122 - C123 - H123 = 119.8  
C123 - C124 - C125 = 119.55(18)  
C123 - C124 - H124 = 120.2  
C125 - C124 - H124 = 120.2  
C124 - C125 - C126 = 120.59(18)  
C124 - C125 - H125 = 119.7  
C126 - C125 - H125 = 119.7  
C125 - C126 - C121 = 120.62(18)  
C125 - C126 - H126 = 119.7  
C121 - C126 - H126 = 119.7  
C132 - C127 - C128 = 118.54(15)  
C132 - C127 - P12 = 123.87(13)  
C128 - C127 - P12 = 117.59(13)  
C129 - C128 - C127 = 120.37(18)  
C129 - C128 - H128 = 119.8  
C127 - C128 - H128 = 119.8  
C130 - C129 - C128 = 120.47(18)  
C130 - C129 - H129 = 119.8  
C128 - C129 - H129 = 119.8  
C131 - C130 - C129 = 119.58(16)  
C131 - C130 - H130 = 120.2  
C129 - C130 - H130 = 120.2  
C130 - C131 - C132 = 120.46(17)  
C130 - C131 - H131 = 119.8  
C132 - C131 - H131 = 119.8  
C131 - C132 - C127 = 120.58(16)  
C131 - C132 - H132 = 119.7  
C127 - C132 - H132 = 119.7  
C134 - C133 - C138 = 118.09(15)  
C134 - C133 - P12 = 121.35(12)  
C138 - C133 - P12 = 120.14(12)  
C135 - C134 - C133 = 121.79(15)  
C135 - C134 - H134 = 119.1  
C133 - C134 - H134 = 119.1  
C136 - C135 - C134 = 119.79(16)  
C136 - C135 - H135 = 120.1  
C134 - C135 - H135 = 120.1  
C135 - C136 - C137 = 119.40(16)  
C135 - C136 - H136 = 120.3  
C137 - C136 - H136 = 120.3  
C136 - C137 - C138 = 121.70(16)  
C136 - C137 - H137 = 119.1  
C138 - C137 - H137 = 119.1  
C137 - C138 - C133 = 119.12(15)  
C137 - C138 - C139 = 118.22(14)  
C133 - C138 - C139 = 122.66(15)



N11 - C139 - C138 = 110.24 (13)  
N11 - C139 - H13A = 109.6  
C138 - C139 - H13A = 109.6  
N11 - C139 - H13B = 109.6  
C138 - C139 - H13B = 109.6  
H13A - C139 - H13B = 108.1  
C141 - P13 - C147 = 102.21 (8)  
C141 - P13 - C153 = 102.10 (8)  
C147 - P13 - C153 = 100.85 (7)  
C142 - C141 - C146 = 118.21 (19)  
C142 - C141 - P13 = 117.96 (16)  
C146 - C141 - P13 = 123.83 (15)  
C143 - C142 - C141 = 120.9 (2)  
C143 - C142 - H142 = 119.6  
C141 - C142 - H142 = 119.6  
C144 - C143 - C142 = 120.1 (2)  
C144 - C143 - H143 = 120  
C142 - C143 - H143 = 120  
C145 - C144 - C143 = 120.0 (2)  
C145 - C144 - H144 = 120  
C143 - C144 - H144 = 120  
C144 - C145 - C146 = 120.5 (2)  
C144 - C145 - H145 = 119.8  
C146 - C145 - H145 = 119.8  
C145 - C146 - C141 = 120.3 (2)  
C145 - C146 - H146 = 119.8  
C141 - C146 - H146 = 119.8  
C148 - C147 - C152 = 118.67 (16)  
C148 - C147 - P13 = 124.82 (14)  
C152 - C147 - P13 = 116.50 (13)  
C147 - C148 - C149 = 120.14 (18)  
C147 - C148 - H148 = 119.9  
C149 - C148 - H148 = 119.9  
C150 - C149 - C148 = 120.34 (19)  
C150 - C149 - H149 = 119.8  
C148 - C149 - H149 = 119.8  
C151 - C150 - C149 = 120.30 (17)  
C151 - C150 - H150 = 119.8  
C149 - C150 - H150 = 119.8  
C150 - C151 - C152 = 119.60 (19)  
C150 - C151 - H151 = 120.2  
C152 - C151 - H151 = 120.2  
C151 - C152 - C147 = 120.93 (18)  
C151 - C152 - H152 = 119.5  
C147 - C152 - H152 = 119.5  
C154 - C153 - C158 = 118.32 (15)  
C154 - C153 - P13 = 121.92 (12)  
C158 - C153 - P13 = 119.67 (12)  
C155 - C154 - C153 = 121.55 (16)  
C155 - C154 - H154 = 119.2  
C153 - C154 - H154 = 119.2  
C154 - C155 - C156 = 120.13 (16)  
C154 - C155 - H155 = 119.9  
C156 - C155 - H155 = 119.9  
C155 - C156 - C157 = 118.79 (17)  
C155 - C156 - H156 = 120.6  
C157 - C156 - H156 = 120.6  
C156 - C157 - C158 = 122.04 (16)

C156 - C157 - H157 = 119  
C158 - C157 - H157 = 119  
C157 - C158 - C153 = 119.16 (15)  
C157 - C158 - C159 = 117.50 (14)  
C153 - C158 - C159 = 123.33 (15)  
N11 - C159 - C158 = 111.24 (13)  
N11 - C159 - H15A = 109.4  
C158 - C159 - H15A = 109.4  
N11 - C159 - H15B = 109.4  
C158 - C159 - H15B = 109.4  
H15A - C159 - H15B = 108

#### Torsion angles [°]

C7 - P1 - C1 - C2 = -119.21 (15)  
C13 - P1 - C1 - C2 = 137.14 (15)  
C7 - P1 - C1 - C6 = 63.61 (18)  
C13 - P1 - C1 - C6 = -40.04 (18)  
C6 - C1 - C2 - C3 = -0.8 (3)  
P1 - C1 - C2 - C3 = -178.18 (15)  
C1 - C2 - C3 - C4 = -0.2 (3)  
C2 - C3 - C4 - C5 = 0.5 (3)  
C3 - C4 - C5 - C6 = 0.2 (3)  
C4 - C5 - C6 - C1 = -1.1 (3)  
C2 - C1 - C6 - C5 = 1.4 (3)  
P1 - C1 - C6 - C5 = 178.61 (16)  
C1 - P1 - C7 - C8 = -10.0 (2)  
C13 - P1 - C7 - C8 = 92.85 (18)  
C1 - P1 - C7 - C12 = 171.88 (15)  
C13 - P1 - C7 - C12 = -85.28 (16)  
C12 - C7 - C8 - C9 = 0.6 (3)  
P1 - C7 - C8 - C9 = -177.44 (16)  
C7 - C8 - C9 - C10 = -1.1 (3)  
C8 - C9 - C10 - C11 = 1.2 (3)  
C9 - C10 - C11 - C12 = -0.8 (3)  
C10 - C11 - C12 - C7 = 0.3 (3)  
C8 - C7 - C12 - C11 = -0.2 (3)  
P1 - C7 - C12 - C11 = 178.07 (18)  
C7 - P1 - C13 - C14 = -10.68 (16)  
C1 - P1 - C13 - C14 = 96.82 (15)  
C7 - P1 - C13 - C18 = 169.13 (13)  
C1 - P1 - C13 - C18 = -83.38 (14)  
C18 - C13 - C14 - C15 = 2.4 (2)  
P1 - C13 - C14 - C15 = -177.76 (13)  
C13 - C14 - C15 - C16 = 1.5 (3)  
C14 - C15 - C16 - C17 = -3.2 (3)  
C15 - C16 - C17 - C18 = 0.9 (3)  
C16 - C17 - C18 - C13 = 3.1 (2)  
C16 - C17 - C18 - C19 = -175.45 (15)  
C14 - C13 - C18 - C17 = -4.7 (2)  
P1 - C13 - C18 - C17 = 175.53 (12)  
C14 - C13 - C18 - C19 = 173.79 (15)  
P1 - C13 - C18 - C19 = -6.0 (2)  
C59 - N1 - C19 - C18 = -171.25 (14)  
C39 - N1 - C19 - C18 = 63.93 (18)

C17 - C18 - C19 - N1 = 53.60 (19)  
C13 - C18 - C19 - N1 = -124.86 (16)  
C27 - P2 - C21 - C26 = 108.49 (15)  
C33 - P2 - C21 - C26 = 3.97 (16)  
C27 - P2 - C21 - C22 = -74.88 (15)  
C33 - P2 - C21 - C22 = -179.40 (13)  
C26 - C21 - C22 - C23 = -1.3 (3)  
P2 - C21 - C22 - C23 = -178.16 (16)  
C21 - C22 - C23 - C24 = 0.9 (3)  
C22 - C23 - C24 - C25 = 0.1 (3)  
C23 - C24 - C25 - C26 = -0.7 (3)  
C22 - C21 - C26 - C25 = 0.7 (3)  
P2 - C21 - C26 - C25 = 177.29 (14)  
C24 - C25 - C26 - C21 = 0.3 (3)  
C33 - P2 - C27 - C28 = 79.54 (16)  
C21 - P2 - C27 - C28 = -25.90 (18)  
C33 - P2 - C27 - C32 = -97.61 (15)  
C21 - P2 - C27 - C32 = 156.95 (15)  
C32 - C27 - C28 - C29 = 1.8 (3)  
P2 - C27 - C28 - C29 = -175.33 (15)  
C27 - C28 - C29 - C30 = -1.0 (3)  
C28 - C29 - C30 - C31 = -0.2 (3)  
C29 - C30 - C31 - C32 = 0.7 (4)  
C30 - C31 - C32 - C27 = 0.2 (3)  
C28 - C27 - C32 - C31 = -1.4 (3)  
P2 - C27 - C32 - C31 = 175.95 (17)  
C27 - P2 - C33 - C34 = 1.30 (16)  
C21 - P2 - C33 - C34 = 106.59 (15)  
C27 - P2 - C33 - C38 = 178.18 (13)  
C21 - P2 - C33 - C38 = -76.53 (14)  
C38 - C33 - C34 - C35 = 0.3 (3)  
P2 - C33 - C34 - C35 = 177.23 (13)  
C33 - C34 - C35 - C36 = 1.7 (3)  
C34 - C35 - C36 - C37 = -1.2 (3)  
C35 - C36 - C37 - C38 = -1.2 (3)  
C36 - C37 - C38 - C33 = 3.2 (3)  
C36 - C37 - C38 - C39 = -178.69 (16)  
C34 - C33 - C38 - C37 = -2.7 (2)  
P2 - C33 - C38 - C37 = -179.74 (13)  
C34 - C33 - C38 - C39 = 179.23 (16)  
P2 - C33 - C38 - C39 = 2.2 (2)  
C59 - N1 - C39 - C38 = 75.87 (18)  
C19 - N1 - C39 - C38 = -159.24 (15)  
C37 - C38 - C39 - N1 = 26.5 (2)  
C33 - C38 - C39 - N1 = -155.51 (16)  
C47 - P3 - C41 - C42 = -7.43 (17)  
C53 - P3 - C41 - C42 = 96.92 (16)  
C47 - P3 - C41 - C46 = 170.84 (13)  
C53 - P3 - C41 - C46 = -84.82 (14)  
C46 - C41 - C42 - C43 = 0.5 (3)  
P3 - C41 - C42 - C43 = 178.74 (14)  
C41 - C42 - C43 - C44 = 0.7 (3)  
C42 - C43 - C44 - C45 = -1.0 (3)  
C43 - C44 - C45 - C46 = -0.1 (3)  
C44 - C45 - C46 - C41 = 1.4 (3)  
C42 - C41 - C46 - C45 = -1.6 (3)  
P3 - C41 - C46 - C45 = -179.93 (14)  
C41 - P3 - C47 - C48 = 93.91 (15)

C53 - P3 - C47 - C48 = -10.23 (16)  
C41 - P3 - C47 - C52 = -87.28 (15)  
C53 - P3 - C47 - C52 = 168.58 (14)  
C52 - C47 - C48 - C49 = 0.3 (2)  
P3 - C47 - C48 - C49 = 179.10 (13)  
C47 - C48 - C49 - C50 = 0.4 (3)  
C48 - C49 - C50 - C51 = -0.5 (3)  
C49 - C50 - C51 - C52 = -0.1 (3)  
C50 - C51 - C52 - C47 = 0.9 (3)  
C48 - C47 - C52 - C51 = -0.9 (3)  
P3 - C47 - C52 - C51 = -179.83 (15)  
C41 - P3 - C53 - C54 = -10.16 (17)  
C47 - P3 - C53 - C54 = 95.29 (16)  
C41 - P3 - C53 - C58 = 167.38 (14)  
C47 - P3 - C53 - C58 = -87.17 (14)  
C58 - C53 - C54 - C55 = 0.1 (3)  
P3 - C53 - C54 - C55 = 177.68 (14)  
C53 - C54 - C55 - C56 = 0.6 (3)  
C54 - C55 - C56 - C57 = -0.4 (3)  
C55 - C56 - C57 - C58 = -0.7 (3)  
C56 - C57 - C58 - C53 = 1.4 (3)  
C56 - C57 - C58 - C59 = -177.16 (18)  
C54 - C53 - C58 - C57 = -1.1 (3)  
P3 - C53 - C58 - C57 = -178.77 (14)  
C54 - C53 - C58 - C59 = 177.36 (16)  
P3 - C53 - C58 - C59 = -0.3 (2)  
C39 - N1 - C59 - C58 = -164.37 (13)  
C19 - N1 - C59 - C58 = 70.08 (17)  
C57 - C58 - C59 - N1 = 67.2 (2)  
C53 - C58 - C59 - N1 = -111.32 (18)  
C107 - P11 - C101 - C106 = 45.35 (16)  
C113 - P11 - C101 - C106 = -60.65 (16)  
C107 - P11 - C101 - C102 = -138.74 (14)  
C113 - P11 - C101 - C102 = 115.26 (15)  
C106 - C101 - C102 - C103 = -0.7 (3)  
P11 - C101 - C102 - C103 = -176.85 (15)  
C101 - C102 - C103 - C104 = -0.2 (3)  
C102 - C103 - C104 - C105 = 0.5 (3)  
C103 - C104 - C105 - C106 = 0.0 (3)  
C104 - C105 - C106 - C101 = -0.9 (3)  
C102 - C101 - C106 - C105 = 1.3 (3)  
P11 - C101 - C106 - C105 = 177.15 (14)  
C101 - P11 - C107 - C112 = -160.70 (15)  
C113 - P11 - C107 - C112 = -59.04 (16)  
C101 - P11 - C107 - C108 = 29.76 (18)  
C113 - P11 - C107 - C108 = 131.42 (16)  
C112 - C107 - C108 - C109 = 1.5 (3)  
P11 - C107 - C108 - C109 = 171.07 (16)  
C107 - C108 - C109 - C110 = -0.4 (3)  
C108 - C109 - C110 - C111 = -0.5 (3)  
C109 - C110 - C111 - C112 = 0.3 (3)  
C110 - C111 - C112 - C107 = 0.8 (3)  
C108 - C107 - C112 - C111 = -1.7 (3)  
P11 - C107 - C112 - C111 = -171.78 (16)  
C107 - P11 - C113 - C114 = -19.91 (16)  
C101 - P11 - C113 - C114 = 87.28 (15)  
C107 - P11 - C113 - C118 = 162.20 (13)  
C101 - P11 - C113 - C118 = -90.61 (14)

C118 - C113 - C114 - C115 = 0.3(3)  
P11 - C113 - C114 - C115 = -177.59(13)  
C113 - C114 - C115 - C116 = 1.2(3)  
C114 - C115 - C116 - C117 = -1.3(3)  
C115 - C116 - C117 - C118 = -0.1(3)  
C116 - C117 - C118 - C113 = 1.5(3)  
C116 - C117 - C118 - C119 = -179.37(16)  
C114 - C113 - C118 - C117 = -1.6(2)  
P11 - C113 - C118 - C117 = 176.39(13)  
C114 - C113 - C118 - C119 = 179.31(15)  
P11 - C113 - C118 - C119 = -2.7(2)  
C159 - N11 - C119 - C118 = -171.69(14)  
C139 - N11 - C119 - C118 = 64.21(18)  
C117 - C118 - C119 - N11 = 51.2(2)  
C113 - C118 - C119 - N11 = -129.65(16)  
C127 - P12 - C121 - C126 = -105.58(15)  
C133 - P12 - C121 - C126 = -0.82(16)  
C127 - P12 - C121 - C122 = 76.66(14)  
C133 - P12 - C121 - C122 = -178.58(13)  
C126 - C121 - C122 - C123 = 0.9(3)  
P12 - C121 - C122 - C123 = 178.82(14)  
C121 - C122 - C123 - C124 = -2.3(3)  
C122 - C123 - C124 - C125 = 1.6(3)  
C123 - C124 - C125 - C126 = 0.4(3)  
C124 - C125 - C126 - C121 = -1.7(3)  
C122 - C121 - C126 - C125 = 1.1(3)  
P12 - C121 - C126 - C125 = -176.68(14)  
C121 - P12 - C127 - C132 = 8.67(16)  
C133 - P12 - C127 - C132 = -98.67(15)  
C121 - P12 - C127 - C128 = -172.03(14)  
C133 - P12 - C127 - C128 = 80.63(14)  
C132 - C127 - C128 - C129 = 1.4(3)  
P12 - C127 - C128 - C129 = -177.97(14)  
C127 - C128 - C129 - C130 = -1.1(3)  
C128 - C129 - C130 - C131 = 0.1(3)  
C129 - C130 - C131 - C132 = 0.6(3)  
C130 - C131 - C132 - C127 = -0.3(3)  
C128 - C127 - C132 - C131 = -0.7(2)  
P12 - C127 - C132 - C131 = 178.60(13)  
C121 - P12 - C133 - C134 = -102.54(14)  
C127 - P12 - C133 - C134 = 2.56(16)  
C121 - P12 - C133 - C138 = 84.98(14)  
C127 - P12 - C133 - C138 = -169.91(13)  
C138 - C133 - C134 - C135 = 2.0(2)  
P12 - C133 - C134 - C135 = -170.58(13)  
C133 - C134 - C135 - C136 = 1.0(3)  
C134 - C135 - C136 - C137 = -2.4(3)  
C135 - C136 - C137 - C138 = 0.8(3)  
C136 - C137 - C138 - C133 = 2.3(3)  
C136 - C137 - C138 - C139 = -178.72(16)  
C134 - C133 - C138 - C137 = -3.6(2)  
P12 - C133 - C138 - C137 = 169.09(13)  
C134 - C133 - C138 - C139 = 177.43(15)  
P12 - C133 - C138 - C139 = -9.9(2)  
C159 - N11 - C139 - C138 = 77.26(17)  
C119 - N11 - C139 - C138 = -158.83(14)  
C137 - C138 - C139 - N11 = 35.7(2)  
C133 - C138 - C139 - N11 = -145.32(16)

C147 - P13 - C141 - C142 = -88.47 (15)  
C153 - P13 - C141 - C142 = 167.44 (14)  
C147 - P13 - C141 - C146 = 91.57 (16)  
C153 - P13 - C141 - C146 = -12.51 (16)  
C146 - C141 - C142 - C143 = -2.1 (3)  
P13 - C141 - C142 - C143 = 177.94 (14)  
C141 - C142 - C143 - C144 = 1.3 (3)  
C142 - C143 - C144 - C145 = 0.7 (3)  
C143 - C144 - C145 - C146 = -1.8 (3)  
C144 - C145 - C146 - C141 = 0.9 (3)  
C142 - C141 - C146 - C145 = 1.0 (3)  
P13 - C141 - C146 - C145 = -179.01 (14)  
C141 - P13 - C147 - C148 = -5.51 (17)  
C153 - P13 - C147 - C148 = 99.54 (16)  
C141 - P13 - C147 - C152 = 174.40 (13)  
C153 - P13 - C147 - C152 = -80.54 (14)  
C152 - C147 - C148 - C149 = 0.7 (3)  
P13 - C147 - C148 - C149 = -179.36 (14)  
C147 - C148 - C149 - C150 = 0.6 (3)  
C148 - C149 - C150 - C151 = -1.1 (3)  
C149 - C150 - C151 - C152 = 0.4 (3)  
C150 - C151 - C152 - C147 = 1.0 (3)  
C148 - C147 - C152 - C151 = -1.5 (3)  
P13 - C147 - C152 - C151 = 178.57 (14)  
C141 - P13 - C153 - C154 = 96.56 (15)  
C147 - P13 - C153 - C154 = -8.59 (16)  
C141 - P13 - C153 - C158 = -86.87 (14)  
C147 - P13 - C153 - C158 = 167.98 (14)  
C158 - C153 - C154 - C155 = -0.4 (3)  
P13 - C153 - C154 - C155 = 176.19 (13)  
C153 - C154 - C155 - C156 = 0.8 (3)  
C154 - C155 - C156 - C157 = -0.4 (3)  
C155 - C156 - C157 - C158 = -0.4 (3)  
C156 - C157 - C158 - C153 = 0.8 (3)  
C156 - C157 - C158 - C159 = -179.93 (16)  
C154 - C153 - C158 - C157 = -0.4 (2)  
P13 - C153 - C158 - C157 = -177.05 (13)  
C154 - C153 - C158 - C159 = -179.60 (15)  
P13 - C153 - C158 - C159 = 3.7 (2)  
C119 - N11 - C159 - C158 = 73.36 (17)  
C139 - N11 - C159 - C158 = -161.63 (13)  
C157 - C158 - C159 - N11 = 64.73 (19)  
C153 - C158 - C159 - N11 = -116.02 (17)

## *L*<sup>5</sup>·HCl: Crystal structure report

### X-ray crystallographic study

(C<sub>60</sub> H<sub>52</sub> Cl<sub>10</sub> N P<sub>3</sub>); *M* = 1234.44. APEXII, Bruker-AXS diffractometer, Mo-K $\alpha$  radiation ( $\lambda$  = 0.71073 Å), *T* = 150(2) K; triclinic *P*-1 (I.T.#2), *a* = 10.8501(19), *b* = 13.843(2), *c* = 20.392(3) Å,  $\alpha$  = 93.544(6),  $\beta$  = 95.702(6),  $\gamma$  = 96.184(7) °, *V* = 3021.8(8) Å<sup>3</sup>, *Z* = 2, *d* = 1.357 g.cm<sup>-3</sup>,  $\mu$  = 0.579 mm<sup>-1</sup>. The structure was solved by direct methods using the *SIR97* program [1], and then refined with full-matrix least-square methods based on *F*<sup>2</sup> (*SHELXL-97*) [2] with the aid of the *WINGX* [3] program. All non-hydrogen atoms were refined with anisotropic atomic displacement parameters. H atoms were finally included in their calculated positions. A final refinement on *F*<sup>2</sup> with 13664 unique intensities and 671 parameters converged at  $\omega R(F^2)$  = 0.1481 (*R*(*F*) = 0.0631) for 10236 observed reflections with *I* > 2 $\sigma$ (*I*).

[1] A. Altomare, M. C. Burla, M. Camalli, G. Cascarano, C. Giacovazzo, A. Guagliardi, A. G. G. Moliterni, G. Polidori, R. Spagna, *J. Appl. Cryst.* (1999) 32, 115-119

[2] Sheldrick G.M., *Acta Cryst.* A64 (2008), 112-122

[3] L. J. Farrugia, *J. Appl. Cryst.*, 1999, 32, 837-838

[4] P. v.d. Sluis and A.L. Spek, *Acta Cryst.* (1990) A46, 194-201

[5] A. L. Spek, *J. Appl. Cryst.* (2003), 36, 7-13

### Structural data

|                                 |                                                                                                                                                     |
|---------------------------------|-----------------------------------------------------------------------------------------------------------------------------------------------------|
| Empirical formula               | C <sub>60</sub> H <sub>52</sub> Cl <sub>10</sub> N P <sub>3</sub>                                                                                   |
| Formula weight                  | 1234.44                                                                                                                                             |
| Temperature                     | 150(2) K                                                                                                                                            |
| Wavelength                      | 0.71073 Å                                                                                                                                           |
| Crystal system, space group     | triclinic, <i>P</i> -1                                                                                                                              |
| Unit cell dimensions            | <i>a</i> = 10.8501(19) Å, $\alpha$ = 93.544(6) °<br><i>b</i> = 13.843(2) Å, $\beta$ = 95.702(6) °<br><i>c</i> = 20.392(3) Å, $\gamma$ = 96.184(7) ° |
| Volume                          | 3021.8(8) Å <sup>3</sup>                                                                                                                            |
| <i>Z</i> , Calculated density   | 2, 1.357 (g.cm <sup>-3</sup> )                                                                                                                      |
| Absorption coefficient          | 0.579 mm <sup>-1</sup>                                                                                                                              |
| <i>F</i> (000)                  | 1268                                                                                                                                                |
| Crystal size                    | 0.57 × 0.51 × 0.42 mm                                                                                                                               |
| Crystal color                   | colourless                                                                                                                                          |
| Theta range for data collection | 2.91 to 27.49 °                                                                                                                                     |
| <i>h</i> _min, <i>h</i> _max    | -14, 14                                                                                                                                             |
| <i>k</i> _min, <i>k</i> _max    | -17, 17                                                                                                                                             |
| <i>l</i> _min, <i>l</i> _max    | -16, 26                                                                                                                                             |
| Reflections collected / unique  | 44988 / 13664 [ <i>R</i> (int) = 0.0554]                                                                                                            |
| Completeness to theta_max       | 0.987                                                                                                                                               |
| Absorption correction type      | multi-scan                                                                                                                                          |

Max. and min. transmission 0.784 , 0.645  
 Refinement method Full-matrix least-squares on  $F^2$   
 Data / restraints / parameters 13664 / 0 / 671  
 Goodness-of-fit 1.052  
 Final R indices [ $I > 2\sigma$ ]  $R1^a = 0.0631$ ,  $wR2^b = 0.1481$   
 R indices (all data)  $R1^a = 0.087$ ,  $wR2^b = 0.1619$   
 Largest diff. peak and hole 1.563 and -1.534 e.Å<sup>-3</sup>

$$^aR1 = \sum | |F_o| - |F_c| | / \sum |F_o|$$

$$^b wR2 = \{ \sum [w(F_o^2 - F_c^2)^2] / \sum [w(F_o^2)^2] \}^{1/2}$$

Atomic coordinates and equivalent isotropic displacement parameters (Å<sup>2</sup> × 10<sup>3</sup>). U(eq) is defined as one third of the trace of the orthogonalized U<sub>ij</sub> tensor.

| Atom | x           | y            | z            | U(eq)        |
|------|-------------|--------------|--------------|--------------|
| N1   | 0.2988 (2)  | 0.12728 (16) | 0.74664 (11) | 0.0188 (5)   |
| H1   | 0.3452      | 0.1879       | 0.7472       | 0.023        |
| P1   | 0.24071 (7) | 0.36305 (5)  | 0.74830 (3)  | 0.02101 (16) |
| P2   | 0.49906 (7) | 0.23703 (5)  | 0.65324 (4)  | 0.02327 (16) |
| P3   | 0.50664 (7) | 0.26127 (5)  | 0.86947 (4)  | 0.02480 (17) |
| C1   | 0.1626 (2)  | 0.1418 (2)   | 0.74501 (13) | 0.0216 (6)   |
| H1A  | 0.1382      | 0.1743       | 0.7046       | 0.026        |
| H1B  | 0.1129      | 0.0771       | 0.7418       | 0.026        |
| C2   | 0.1296 (2)  | 0.2010 (2)   | 0.80397 (13) | 0.0208 (5)   |
| C3   | 0.0690 (3)  | 0.1527 (2)   | 0.85129 (15) | 0.0268 (6)   |
| H3   | 0.0552      | 0.0836       | 0.8476       | 0.032        |
| C4   | 0.0281 (3)  | 0.2040 (2)   | 0.90390 (15) | 0.0315 (7)   |
| H4   | -0.0121     | 0.1699       | 0.9363       | 0.038        |
| C5   | 0.0458 (3)  | 0.3043 (2)   | 0.90920 (15) | 0.0312 (7)   |
| H5   | 0.0159      | 0.3396       | 0.9446       | 0.037        |
| C6   | 0.1079 (3)  | 0.3540 (2)   | 0.86234 (14) | 0.0268 (6)   |
| H6   | 0.1208      | 0.4231       | 0.8664       | 0.032        |
| C7   | 0.1513 (2)  | 0.3032 (2)   | 0.80943 (13) | 0.0216 (6)   |
| C8   | 0.2807 (3)  | 0.4874 (2)   | 0.78534 (14) | 0.0249 (6)   |
| C9   | 0.2070 (3)  | 0.5618 (2)   | 0.77380 (16) | 0.0366 (8)   |
| H9   | 0.1292      | 0.5483       | 0.7473       | 0.044        |
| C10  | 0.2469 (4)  | 0.6561 (3)   | 0.80101 (19) | 0.0479 (10)  |
| H10  | 0.1967      | 0.707        | 0.7925       | 0.057        |
| C11  | 0.3583 (4)  | 0.6757 (3)   | 0.8401 (2)   | 0.0515 (10)  |
| H11  | 0.3847      | 0.74         | 0.8588       | 0.062        |
| C12  | 0.4322 (4)  | 0.6023 (3)   | 0.8523 (2)   | 0.0513 (10)  |
| H12  | 0.5089      | 0.6159       | 0.8799       | 0.062        |
| C13  | 0.3943 (3)  | 0.5087 (2)   | 0.82434 (18) | 0.0380 (8)   |
| H13  | 0.4463      | 0.4586       | 0.8318       | 0.046        |
| C14  | 0.1196 (3)  | 0.3777 (2)   | 0.68157 (14) | 0.0238 (6)   |
| C15  | 0.1600 (3)  | 0.4006 (2)   | 0.62130 (15) | 0.0343 (7)   |
| H15  | 0.2467      | 0.408        | 0.6167       | 0.041        |
| C16  | 0.0745 (4)  | 0.4127 (3)   | 0.56737 (16) | 0.0422 (8)   |
| H16  | 0.103       | 0.4284       | 0.5263       | 0.051        |
| C17  | -0.0505 (4) | 0.4020 (3)   | 0.57378 (18) | 0.0460 (9)   |
| H17  | -0.109      | 0.4091       | 0.537        | 0.055        |
| C18  | -0.0911 (4) | 0.3811 (4)   | 0.6335 (2)   | 0.0638 (13)  |
| H18  | -0.1778     | 0.3757       | 0.6381       | 0.077        |



|      |             |             |              |             |
|------|-------------|-------------|--------------|-------------|
| C19  | -0.0066 (3) | 0.3677 (3)  | 0.68754 (18) | 0.0495 (10) |
| H19  | -0.036      | 0.3517      | 0.7283       | 0.059       |
| C21  | 0.3192 (3)  | 0.0668 (2)  | 0.68458 (13) | 0.0216 (6)  |
| H21A | 0.4087      | 0.0579      | 0.6857       | 0.026       |
| H21B | 0.2715      | 0.0016      | 0.6841       | 0.026       |
| C22  | 0.2793 (3)  | 0.1136 (2)  | 0.62203 (13) | 0.0228 (6)  |
| C23  | 0.1647 (3)  | 0.0794 (2)  | 0.58673 (14) | 0.0268 (6)  |
| H23  | 0.1149      | 0.026       | 0.6014       | 0.032       |
| C24  | 0.1224 (3)  | 0.1226 (2)  | 0.53028 (15) | 0.0324 (7)  |
| H24  | 0.0432      | 0.1         | 0.5071       | 0.039       |
| C25  | 0.1967 (3)  | 0.1987 (2)  | 0.50810 (15) | 0.0332 (7)  |
| H25  | 0.1688      | 0.2283      | 0.4694       | 0.04        |
| C26  | 0.3121 (3)  | 0.2318 (2)  | 0.54243 (14) | 0.0298 (7)  |
| H26  | 0.3627      | 0.2837      | 0.5265       | 0.036       |
| C27  | 0.3552 (3)  | 0.1904 (2)  | 0.59987 (13) | 0.0227 (6)  |
| C28  | 0.5484 (3)  | 0.3519 (2)  | 0.61911 (15) | 0.0262 (6)  |
| C29  | 0.5982 (3)  | 0.3602 (2)  | 0.55919 (16) | 0.0325 (7)  |
| H29  | 0.6085      | 0.3033      | 0.5328       | 0.039       |
| C30  | 0.6326 (3)  | 0.4511 (3)  | 0.53796 (18) | 0.0402 (8)  |
| H30  | 0.6662      | 0.4566      | 0.4969       | 0.048       |
| C31  | 0.6183 (3)  | 0.5342 (3)  | 0.5766 (2)   | 0.0463 (9)  |
| H31  | 0.642       | 0.5966      | 0.5619       | 0.056       |
| C32  | 0.5700 (3)  | 0.5268 (3)  | 0.6362 (2)   | 0.0439 (9)  |
| H32  | 0.5605      | 0.584       | 0.6625       | 0.053       |
| C33  | 0.5351 (3)  | 0.4359 (2)  | 0.65765 (17) | 0.0337 (7)  |
| H33  | 0.502       | 0.4309      | 0.6989       | 0.04        |
| C34  | 0.6116 (3)  | 0.1556 (2)  | 0.62872 (14) | 0.0252 (6)  |
| C35  | 0.7223 (4)  | 0.1620 (3)  | 0.6692 (2)   | 0.0548 (11) |
| H35  | 0.7375      | 0.2089      | 0.706        | 0.066       |
| C36  | 0.8114 (4)  | 0.1007 (4)  | 0.6569 (2)   | 0.0652 (13) |
| H36  | 0.8879      | 0.1069      | 0.6847       | 0.078       |
| C37  | 0.7902 (3)  | 0.0317 (3)  | 0.60519 (19) | 0.0429 (8)  |
| H37  | 0.8516      | -0.0102     | 0.5968       | 0.051       |
| C38  | 0.6812 (4)  | 0.0234 (4)  | 0.5661 (2)   | 0.0697 (15) |
| H38  | 0.6653      | -0.0256     | 0.5306       | 0.084       |
| C39  | 0.5915 (4)  | 0.0858 (3)  | 0.5771 (2)   | 0.0623 (13) |
| H39  | 0.5159      | 0.0799      | 0.5485       | 0.075       |
| C41  | 0.3430 (3)  | 0.0781 (2)  | 0.80781 (13) | 0.0219 (6)  |
| H41A | 0.3223      | 0.1154      | 0.8475       | 0.026       |
| H41B | 0.2978      | 0.0118      | 0.8062       | 0.026       |
| C42  | 0.4814 (3)  | 0.0709 (2)  | 0.81409 (13) | 0.0226 (6)  |
| C43  | 0.5228 (3)  | -0.0162 (2) | 0.79295 (15) | 0.0285 (6)  |
| H43  | 0.4641      | -0.0696     | 0.7753       | 0.034       |
| C44  | 0.6497 (3)  | -0.0257 (2) | 0.79754 (17) | 0.0367 (8)  |
| H44  | 0.6777      | -0.0847     | 0.7817       | 0.044       |
| C45  | 0.7342 (3)  | 0.0506 (3)  | 0.82510 (19) | 0.0410 (8)  |
| H45  | 0.8208      | 0.0439      | 0.8287       | 0.049       |
| C46  | 0.6946 (3)  | 0.1370 (2)  | 0.84766 (17) | 0.0359 (7)  |
| H46  | 0.7541      | 0.1889      | 0.867        | 0.043       |
| C47  | 0.5681 (3)  | 0.1487 (2)  | 0.84233 (14) | 0.0239 (6)  |
| C48  | 0.4553 (3)  | 0.2292 (2)  | 0.94921 (14) | 0.0254 (6)  |
| C49  | 0.3609 (3)  | 0.2779 (2)  | 0.97243 (16) | 0.0333 (7)  |
| H49  | 0.3291      | 0.328       | 0.9483       | 0.04        |
| C50  | 0.3129 (3)  | 0.2539 (3)  | 1.03022 (17) | 0.0394 (8)  |
| H50  | 0.2492      | 0.2884      | 1.0458       | 0.047       |
| C51  | 0.3561 (3)  | 0.1808 (3)  | 1.06540 (17) | 0.0393 (8)  |
| H51  | 0.322       | 0.1643      | 1.1049       | 0.047       |
| C52  | 0.4496 (3)  | 0.1314 (2)  | 1.04293 (16) | 0.0371 (8)  |

|      |              |              |              |              |
|------|--------------|--------------|--------------|--------------|
| H52  | 0.4797       | 0.0806       | 1.067        | 0.045        |
| C53  | 0.4995 (3)   | 0.1558 (2)   | 0.98530 (15) | 0.0317 (7)   |
| H53  | 0.5644       | 0.122        | 0.9704       | 0.038        |
| C54  | 0.6456 (3)   | 0.3484 (2)   | 0.89215 (16) | 0.0291 (6)   |
| C55  | 0.6851 (3)   | 0.3856 (2)   | 0.95698 (18) | 0.0388 (8)   |
| H55  | 0.6452       | 0.3599       | 0.9926       | 0.047        |
| C56  | 0.7825 (4)   | 0.4599 (3)   | 0.9692 (2)   | 0.0520 (10)  |
| H56  | 0.8084       | 0.4854       | 1.0134       | 0.062        |
| C57  | 0.8421 (4)   | 0.4971 (3)   | 0.9184 (2)   | 0.0538 (11)  |
| H57  | 0.9093       | 0.5476       | 0.9275       | 0.065        |
| C58  | 0.8040 (3)   | 0.4605 (3)   | 0.8538 (2)   | 0.0483 (9)   |
| H58  | 0.8453       | 0.4858       | 0.8185       | 0.058        |
| C59  | 0.7062 (3)   | 0.3876 (2)   | 0.84092 (18) | 0.0386 (8)   |
| H59  | 0.6795       | 0.3636       | 0.7966       | 0.046        |
| C101 | 0.1505 (4)   | 0.2671 (3)   | 0.2809 (2)   | 0.0540 (10)  |
| H101 | 0.0779       | 0.2169       | 0.2667       | 0.065        |
| C111 | 0.25929 (13) | 0.21588 (8)  | 0.33303 (5)  | 0.0647 (3)   |
| C112 | 0.09806 (12) | 0.36572 (11) | 0.32211 (9)  | 0.0977 (6)   |
| C113 | 0.2206 (2)   | 0.30222 (11) | 0.21092 (7)  | 0.1104 (6)   |
| C201 | 0.7421 (4)   | 0.2269 (3)   | 0.3774 (2)   | 0.0610 (12)  |
| H201 | 0.7871       | 0.2025       | 0.3404       | 0.073        |
| C121 | 0.7708 (3)   | 0.35400 (11) | 0.38523 (8)  | 0.1423 (10)  |
| C122 | 0.8088 (2)   | 0.18747 (14) | 0.44992 (9)  | 0.1298 (8)   |
| C123 | 0.5884 (3)   | 0.2144 (3)   | 0.35135 (18) | 0.0923 (9)   |
| C128 | 0.5901 (3)   | 0.1536 (3)   | 0.38149 (18) | 0.0923 (9)   |
| C301 | 0.1110 (3)   | 0.8743 (3)   | 0.91254 (18) | 0.0416 (8)   |
| H301 | 0.1209       | 0.8672       | 0.8643       | 0.05         |
| C131 | 0.13465 (12) | 0.76374 (8)  | 0.94754 (6)  | 0.0635 (3)   |
| C132 | -0.03924 (8) | 0.90512 (8)  | 0.92245 (5)  | 0.0524 (3)   |
| C133 | 0.22306 (9)  | 0.96776 (8)  | 0.95105 (5)  | 0.0534 (3)   |
| C14  | 0.11239 (8)  | 0.88469 (6)  | 0.74534 (4)  | 0.03676 (19) |

### Anisotropic displacement parameters (Å<sup>2</sup>)

The anisotropic displacement factor exponent takes the form:

$$-2\pi^2 [ h^2 a^{*2} U_{11} + \dots + 2 h k a^* b^* U_{12} ].$$

| Atom | U11         | U22         | U33         | U23          | U13          | U12         |
|------|-------------|-------------|-------------|--------------|--------------|-------------|
| N1   | 0.0171 (11) | 0.0179 (11) | 0.0212 (11) | 0.0020 (8)   | 0.0017 (9)   | 0.0014 (9)  |
| P1   | 0.0214 (4)  | 0.0201 (3)  | 0.0213 (3)  | 0.0016 (3)   | 0.0010 (3)   | 0.0027 (3)  |
| P2   | 0.0211 (4)  | 0.0244 (4)  | 0.0240 (3)  | 0.0036 (3)   | 0.0008 (3)   | 0.0019 (3)  |
| P3   | 0.0221 (4)  | 0.0236 (4)  | 0.0283 (4)  | 0.0027 (3)   | -0.0031 (3)  | 0.0057 (3)  |
| C1   | 0.0158 (13) | 0.0221 (14) | 0.0260 (13) | 0.0010 (11)  | -0.0010 (10) | 0.0021 (10) |
| C2   | 0.0154 (13) | 0.0249 (14) | 0.0221 (13) | 0.0026 (10)  | -0.0006 (10) | 0.0052 (11) |
| C3   | 0.0205 (14) | 0.0287 (15) | 0.0328 (15) | 0.0089 (12)  | 0.0038 (12)  | 0.0053 (12) |
| C4   | 0.0219 (15) | 0.0462 (19) | 0.0290 (15) | 0.0119 (14)  | 0.0079 (12)  | 0.0064 (13) |
| C5   | 0.0273 (16) | 0.0434 (19) | 0.0250 (14) | 0.0010 (13)  | 0.0058 (12)  | 0.0114 (14) |
| C6   | 0.0280 (15) | 0.0282 (15) | 0.0246 (14) | -0.0013 (11) | 0.0014 (11)  | 0.0086 (12) |
| C7   | 0.0171 (13) | 0.0256 (14) | 0.0225 (13) | 0.0036 (11)  | -0.0002 (10) | 0.0051 (11) |
| C8   | 0.0282 (15) | 0.0209 (14) | 0.0246 (14) | -0.0005 (11) | 0.0010 (11)  | 0.0009 (11) |

|      |             |             |             |              |              |              |
|------|-------------|-------------|-------------|--------------|--------------|--------------|
| C9   | 0.0424 (19) | 0.0303 (17) | 0.0354 (17) | -0.0036 (13) | -0.0065 (14) | 0.0098 (14)  |
| C10  | 0.070 (3)   | 0.0263 (17) | 0.048 (2)   | -0.0046 (15) | -0.0012 (19) | 0.0171 (17)  |
| C11  | 0.068 (3)   | 0.0286 (19) | 0.053 (2)   | -0.0129 (16) | 0.002 (2)    | -0.0053 (18) |
| C12  | 0.044 (2)   | 0.044 (2)   | 0.059 (2)   | -0.0120 (18) | -0.0109 (18) | -0.0064 (17) |
| C13  | 0.0305 (17) | 0.0345 (18) | 0.0464 (19) | -0.0014 (15) | -0.0065 (14) | 0.0037 (14)  |
| C14  | 0.0258 (15) | 0.0193 (13) | 0.0254 (14) | 0.0007 (11)  | -0.0012 (11) | 0.0026 (11)  |
| C15  | 0.0359 (18) | 0.0383 (18) | 0.0303 (16) | 0.0075 (13)  | 0.0035 (13)  | 0.0088 (14)  |
| C16  | 0.056 (2)   | 0.047 (2)   | 0.0252 (16) | 0.0092 (14)  | 0.0005 (15)  | 0.0157 (18)  |
| C17  | 0.050 (2)   | 0.045 (2)   | 0.0378 (19) | 0.0116 (16)  | -0.0185 (16) | 0.0014 (17)  |
| C18  | 0.0268 (19) | 0.104 (4)   | 0.058 (3)   | 0.036 (2)    | -0.0125 (17) | -0.004 (2)   |
| C19  | 0.0299 (18) | 0.080 (3)   | 0.0375 (19) | 0.0257 (19)  | -0.0036 (15) | -0.0028 (18) |
| C21  | 0.0237 (14) | 0.0195 (13) | 0.0217 (13) | 0.0006 (10)  | 0.0035 (11)  | 0.0031 (11)  |
| C22  | 0.0239 (14) | 0.0244 (14) | 0.0203 (13) | -0.0022 (11) | 0.0019 (11)  | 0.0069 (11)  |
| C23  | 0.0243 (15) | 0.0271 (15) | 0.0277 (14) | -0.0031 (11) | 0.0026 (11)  | 0.0000 (12)  |
| C24  | 0.0263 (16) | 0.0397 (18) | 0.0287 (15) | -0.0083 (13) | -0.0057 (12) | 0.0058 (14)  |
| C25  | 0.0354 (18) | 0.0390 (18) | 0.0245 (14) | 0.0023 (13)  | -0.0070 (13) | 0.0104 (14)  |
| C26  | 0.0309 (16) | 0.0311 (16) | 0.0277 (15) | 0.0078 (12)  | 0.0010 (12)  | 0.0037 (13)  |
| C27  | 0.0238 (14) | 0.0233 (14) | 0.0216 (13) | 0.0010 (11)  | 0.0022 (11)  | 0.0068 (11)  |
| C28  | 0.0180 (14) | 0.0267 (15) | 0.0330 (15) | 0.0065 (12)  | -0.0020 (11) | -0.0001 (11) |
| C29  | 0.0263 (16) | 0.0379 (18) | 0.0337 (16) | 0.0090 (13)  | 0.0015 (13)  | 0.0030 (13)  |
| C30  | 0.0260 (17) | 0.053 (2)   | 0.0405 (18) | 0.0206 (16)  | -0.0024 (14) | -0.0050 (15) |
| C31  | 0.039 (2)   | 0.037 (2)   | 0.058 (2)   | 0.0205 (17)  | -0.0152 (17) | -0.0099 (15) |
| C32  | 0.041 (2)   | 0.0269 (17) | 0.059 (2)   | 0.0029 (16)  | -0.0077 (17) | -0.0029 (15) |
| C33  | 0.0267 (16) | 0.0303 (17) | 0.0423 (18) | 0.0010 (14)  | 0.0002 (13)  | -0.0009 (13) |
| C34  | 0.0232 (15) | 0.0239 (14) | 0.0291 (14) | 0.0079 (11)  | 0.0029 (11)  | 0.0023 (11)  |
| C35  | 0.038 (2)   | 0.059 (3)   | 0.063 (3)   | -0.024 (2)   | -0.0130 (18) | 0.0190 (19)  |
| C36  | 0.032 (2)   | 0.083 (3)   | 0.077 (3)   | -0.020 (2)   | -0.018 (2)   | 0.026 (2)    |
| C37  | 0.0328 (19) | 0.040 (2)   | 0.059 (2)   | 0.0036 (17)  | 0.0080 (16)  | 0.0136 (15)  |
| C38  | 0.046 (2)   | 0.077 (3)   | 0.080 (3)   | -0.046 (3)   | -0.013 (2)   | 0.029 (2)    |
| C39  | 0.039 (2)   | 0.081 (3)   | 0.061 (3)   | -0.037 (2)   | -0.0203 (19) | 0.028 (2)    |
| C41  | 0.0208 (14) | 0.0231 (14) | 0.0219 (13) | 0.0045 (11)  | 0.0025 (10)  | 0.0014 (11)  |
| C42  | 0.0217 (14) | 0.0261 (14) | 0.0210 (13) | 0.0061 (11)  | 0.0017 (10)  | 0.0057 (11)  |
| C43  | 0.0315 (16) | 0.0258 (15) | 0.0284 (15) | 0.0028 (12)  | 0.0016 (12)  | 0.0054 (12)  |
| C44  | 0.0363 (18) | 0.0337 (18) | 0.0434 (18) | 0.0020 (14)  | 0.0056 (15)  | 0.0180 (15)  |
| C45  | 0.0234 (16) | 0.043 (2)   | 0.059 (2)   | 0.0035 (17)  | 0.0031 (15)  | 0.0149 (15)  |
| C46  | 0.0223 (16) | 0.0347 (18) | 0.050 (2)   | 0.0022 (15)  | -0.0024 (14) | 0.0050 (13)  |
| C47  | 0.0222 (14) | 0.0242 (14) | 0.0264 (14) | 0.0058 (11)  | 0.0005 (11)  | 0.0077 (11)  |
| C48  | 0.0219 (14) | 0.0247 (14) | 0.0279 (14) | 0.0003 (11)  | -0.0031 (11) | 0.0011 (11)  |
| C49  | 0.0259 (16) | 0.0381 (18) | 0.0364 (17) | 0.0017 (14)  | -0.0018 (13) | 0.0109 (13)  |
| C50  | 0.0290 (17) | 0.053 (2)   | 0.0372 (18) | -0.0034 (15) | 0.0036 (14)  | 0.0108 (15)  |
| C51  | 0.0359 (19) | 0.047 (2)   | 0.0324 (17) | -0.0002 (15) | 0.0050 (14)  | -0.0061 (16) |
| C52  | 0.045 (2)   | 0.0306 (17) | 0.0342 (17) | 0.0038 (13)  | -0.0019 (14) | 0.0007 (15)  |
| C53  | 0.0334 (17) | 0.0304 (16) | 0.0320 (16) | 0.0034 (13)  | 0.0002 (13)  | 0.0092 (13)  |
| C54  | 0.0247 (15) | 0.0208 (14) | 0.0416 (17) | 0.0035 (12)  | -0.0023 (13) | 0.0059 (12)  |
| C55  | 0.0347 (18) | 0.0341 (18) | 0.0450 (19) | -0.0015 (15) | -0.0032 (15) | 0.0014 (14)  |
| C56  | 0.045 (2)   | 0.039 (2)   | 0.065 (3)   | -0.0154 (18) | -0.0078 (19) | -0.0026 (17) |
| C57  | 0.037 (2)   | 0.0283 (19) | 0.093 (3)   | -0.002 (2)   | 0.005 (2)    | -0.0036 (16) |
| C58  | 0.036 (2)   | 0.035 (2)   | 0.076 (3)   | 0.0149 (19)  | 0.0121 (19)  | 0.0040 (16)  |
| C59  | 0.0388 (19) | 0.0319 (17) | 0.0462 (19) | 0.0085 (15)  | 0.0033 (15)  | 0.0069 (15)  |
| C101 | 0.059 (3)   | 0.038 (2)   | 0.059 (2)   | -0.0059 (18) | -0.006 (2)   | -0.0053 (18) |
| C111 | 0.0917 (9)  | 0.0527 (6)  | 0.0518 (6)  | 0.0033 (5)   | 0.0031 (6)   | 0.0221 (6)   |
| C112 | 0.0530 (7)  | 0.0848 (9)  | 0.1451 (14) | -0.0495 (9)  | -0.0256 (8)  | 0.0280 (7)   |
| C113 | 0.205 (2)   | 0.0670 (9)  | 0.0598 (8)  | 0.0217 (7)   | 0.0199 (10)  | 0.0016 (10)  |
| C201 | 0.072 (3)   | 0.056 (3)   | 0.058 (3)   | -0.014 (2)   | 0.012 (2)    | 0.023 (2)    |
| C121 | 0.310 (3)   | 0.0608 (9)  | 0.0770 (10) | 0.0134 (7)   | 0.0852 (14)  | 0.0513 (13)  |
| C122 | 0.200 (2)   | 0.1167 (14) | 0.0883 (11) | 0.0079 (10)  | 0.0041 (12)  | 0.1004 (15)  |
| C123 | 0.0625 (10) | 0.108 (2)   | 0.099 (2)   | -0.0396 (15) | 0.0015 (13)  | 0.0096 (16)  |
| C128 | 0.0625 (10) | 0.108 (2)   | 0.099 (2)   | -0.0396 (15) | 0.0015 (13)  | 0.0096 (16)  |

|      |            |            |             |             |             |             |
|------|------------|------------|-------------|-------------|-------------|-------------|
| C301 | 0.042 (2)  | 0.050 (2)  | 0.0373 (18) | 0.0151 (16) | 0.0138 (15) | 0.0117 (17) |
| C131 | 0.0903 (8) | 0.0507 (6) | 0.0629 (6)  | 0.0196 (5)  | 0.0397 (6)  | 0.0305 (6)  |
| C132 | 0.0314 (5) | 0.0675 (6) | 0.0611 (6)  | 0.0199 (5)  | 0.0076 (4)  | 0.0074 (4)  |
| C133 | 0.0371 (5) | 0.0651 (6) | 0.0573 (6)  | 0.0187 (5)  | -0.0047 (4) | 0.0038 (4)  |
| C14  | 0.0480 (5) | 0.0238 (4) | 0.0372 (4)  | -0.0013 (3) | 0.0108 (3)  | -0.0056 (3) |

### Bond lengths [Å]

|     |   |     |   |           |
|-----|---|-----|---|-----------|
| N1  | - | C1  | = | 1.510 (3) |
| N1  | - | C41 | = | 1.518 (3) |
| N1  | - | C21 | = | 1.522 (3) |
| N1  | - | H1  | = | 0.93      |
| P1  | - | C8  | = | 1.826 (3) |
| P1  | - | C14 | = | 1.832 (3) |
| P1  | - | C7  | = | 1.837 (3) |
| P2  | - | C28 | = | 1.823 (3) |
| P2  | - | C34 | = | 1.833 (3) |
| P2  | - | C27 | = | 1.843 (3) |
| P3  | - | C54 | = | 1.829 (3) |
| P3  | - | C48 | = | 1.835 (3) |
| P3  | - | C47 | = | 1.836 (3) |
| C1  | - | C2  | = | 1.508 (4) |
| C1  | - | H1A | = | 0.99      |
| C1  | - | H1B | = | 0.99      |
| C2  | - | C3  | = | 1.387 (4) |
| C2  | - | C7  | = | 1.405 (4) |
| C3  | - | C4  | = | 1.385 (4) |
| C3  | - | H3  | = | 0.95      |
| C4  | - | C5  | = | 1.378 (5) |
| C4  | - | H4  | = | 0.95      |
| C5  | - | C6  | = | 1.396 (4) |
| C5  | - | H5  | = | 0.95      |
| C6  | - | C7  | = | 1.400 (4) |
| C6  | - | H6  | = | 0.95      |
| C8  | - | C9  | = | 1.387 (4) |
| C8  | - | C13 | = | 1.392 (4) |
| C9  | - | C10 | = | 1.394 (5) |
| C9  | - | H9  | = | 0.95      |
| C10 | - | C11 | = | 1.372 (6) |
| C10 | - | H10 | = | 0.95      |
| C11 | - | C12 | = | 1.380 (6) |
| C11 | - | H11 | = | 0.95      |
| C12 | - | C13 | = | 1.387 (5) |
| C12 | - | H12 | = | 0.95      |
| C13 | - | H13 | = | 0.95      |
| C14 | - | C19 | = | 1.379 (5) |
| C14 | - | C15 | = | 1.389 (4) |
| C15 | - | C16 | = | 1.398 (4) |
| C15 | - | H15 | = | 0.95      |
| C16 | - | C17 | = | 1.368 (5) |
| C16 | - | H16 | = | 0.95      |
| C17 | - | C18 | = | 1.372 (6) |
| C17 | - | H17 | = | 0.95      |
| C18 | - | C19 | = | 1.397 (5) |
| C18 | - | H18 | = | 0.95      |
| C19 | - | H19 | = | 0.95      |
| C21 | - | C22 | = | 1.512 (4) |

C21 - H21A = 0.99  
C21 - H21B = 0.99  
C22 - C23 = 1.393(4)  
C22 - C27 = 1.399(4)  
C23 - C24 = 1.390(4)  
C23 - H23 = 0.95  
C24 - C25 = 1.383(5)  
C24 - H24 = 0.95  
C25 - C26 = 1.389(4)  
C25 - H25 = 0.95  
C26 - C27 = 1.397(4)  
C26 - H26 = 0.95  
C28 - C29 = 1.391(4)  
C28 - C33 = 1.392(4)  
C29 - C30 = 1.381(5)  
C29 - H29 = 0.95  
C30 - C31 = 1.385(6)  
C30 - H30 = 0.95  
C31 - C32 = 1.374(6)  
C31 - H31 = 0.95  
C32 - C33 = 1.385(5)  
C32 - H32 = 0.95  
C33 - H33 = 0.95  
C34 - C39 = 1.369(5)  
C34 - C35 = 1.380(5)  
C35 - C36 = 1.384(5)  
C35 - H35 = 0.95  
C36 - C37 = 1.364(6)  
C36 - H36 = 0.95  
C37 - C38 = 1.349(5)  
C37 - H37 = 0.95  
C38 - C39 = 1.395(5)  
C38 - H38 = 0.95  
C39 - H39 = 0.95  
C41 - C42 = 1.509(4)  
C41 - H41A = 0.99  
C41 - H41B = 0.99  
C42 - C43 = 1.390(4)  
C42 - C47 = 1.406(4)  
C43 - C44 = 1.391(4)  
C43 - H43 = 0.95  
C44 - C45 = 1.375(5)  
C44 - H44 = 0.95  
C45 - C46 = 1.381(5)  
C45 - H45 = 0.95  
C46 - C47 = 1.393(4)  
C46 - H46 = 0.95  
C48 - C53 = 1.390(4)  
C48 - C49 = 1.391(4)  
C49 - C50 = 1.379(5)  
C49 - H49 = 0.95  
C50 - C51 = 1.372(5)  
C50 - H50 = 0.95  
C51 - C52 = 1.382(5)  
C51 - H51 = 0.95  
C52 - C53 = 1.388(5)  
C52 - H52 = 0.95  
C53 - H53 = 0.95

C54 - C59 = 1.395(5)  
C54 - C55 = 1.397(5)  
C55 - C56 = 1.386(5)  
C55 - H55 = 0.95  
C56 - C57 = 1.372(6)  
C56 - H56 = 0.95  
C57 - C58 = 1.389(6)  
C57 - H57 = 0.95  
C58 - C59 = 1.376(5)  
C58 - H58 = 0.95  
C59 - H59 = 0.95  
C101 - C112 = 1.736(4)  
C101 - C111 = 1.747(4)  
C101 - C113 = 1.753(5)  
C101 - H101 = 1  
C201 - C123 = 1.686(6)  
C201 - C122 = 1.726(5)  
C201 - C121 = 1.748(5)  
C201 - C128 = 1.853(6)  
C201 - H201 = 1  
C301 - C132 = 1.756(4)  
C301 - C131 = 1.761(4)  
C301 - C133 = 1.765(4)  
C301 - H301 = 1

Angles [°]

C1 - N1 - C41 = 111.4(2)  
C1 - N1 - C21 = 109.4(2)  
C41 - N1 - C21 = 110.2(2)  
C1 - N1 - H1 = 108.6  
C41 - N1 - H1 = 108.6  
C21 - N1 - H1 = 108.6  
C8 - P1 - C14 = 102.45(13)  
C8 - P1 - C7 = 103.11(13)  
C14 - P1 - C7 = 102.68(13)  
C28 - P2 - C34 = 104.25(13)  
C28 - P2 - C27 = 103.26(13)  
C34 - P2 - C27 = 103.35(13)  
C54 - P3 - C48 = 103.88(14)  
C54 - P3 - C47 = 104.24(13)  
C48 - P3 - C47 = 100.92(13)  
C2 - C1 - N1 = 114.8(2)  
C2 - C1 - H1A = 108.6  
N1 - C1 - H1A = 108.6  
C2 - C1 - H1B = 108.6  
N1 - C1 - H1B = 108.6  
H1A - C1 - H1B = 107.5  
C3 - C2 - C7 = 119.9(3)  
C3 - C2 - C1 = 118.4(3)  
C7 - C2 - C1 = 121.6(2)  
C4 - C3 - C2 = 120.9(3)  
C4 - C3 - H3 = 119.6  
C2 - C3 - H3 = 119.6  
C5 - C4 - C3 = 120.0(3)

C5 - C4 - H4 = 120  
C3 - C4 - H4 = 120  
C4 - C5 - C6 = 119.7(3)  
C4 - C5 - H5 = 120.1  
C6 - C5 - H5 = 120.1  
C5 - C6 - C7 = 120.9(3)  
C5 - C6 - H6 = 119.6  
C7 - C6 - H6 = 119.6  
C6 - C7 - C2 = 118.5(3)  
C6 - C7 - P1 = 123.4(2)  
C2 - C7 - P1 = 118.1(2)  
C9 - C8 - C13 = 118.9(3)  
C9 - C8 - P1 = 123.4(2)  
C13 - C8 - P1 = 117.5(2)  
C8 - C9 - C10 = 120.2(3)  
C8 - C9 - H9 = 119.9  
C10 - C9 - H9 = 119.9  
C11 - C10 - C9 = 120.2(3)  
C11 - C10 - H10 = 119.9  
C9 - C10 - H10 = 119.9  
C10 - C11 - C12 = 120.3(3)  
C10 - C11 - H11 = 119.8  
C12 - C11 - H11 = 119.8  
C11 - C12 - C13 = 119.8(3)  
C11 - C12 - H12 = 120.1  
C13 - C12 - H12 = 120.1  
C12 - C13 - C8 = 120.6(3)  
C12 - C13 - H13 = 119.7  
C8 - C13 - H13 = 119.7  
C19 - C14 - C15 = 118.9(3)  
C19 - C14 - P1 = 124.6(2)  
C15 - C14 - P1 = 116.5(2)  
C14 - C15 - C16 = 120.7(3)  
C14 - C15 - H15 = 119.7  
C16 - C15 - H15 = 119.7  
C17 - C16 - C15 = 119.9(3)  
C17 - C16 - H16 = 120.1  
C15 - C16 - H16 = 120.1  
C16 - C17 - C18 = 119.8(3)  
C16 - C17 - H17 = 120.1  
C18 - C17 - H17 = 120.1  
C17 - C18 - C19 = 120.8(4)  
C17 - C18 - H18 = 119.6  
C19 - C18 - H18 = 119.6  
C14 - C19 - C18 = 119.9(3)  
C14 - C19 - H19 = 120.1  
C18 - C19 - H19 = 120.1  
C22 - C21 - N1 = 112.5(2)  
C22 - C21 - H21A = 109.1  
N1 - C21 - H21A = 109.1  
C22 - C21 - H21B = 109.1  
N1 - C21 - H21B = 109.1  
H21A - C21 - H21B = 107.8  
C23 - C22 - C27 = 120.2(3)  
C23 - C22 - C21 = 118.9(3)  
C27 - C22 - C21 = 120.9(2)  
C24 - C23 - C22 = 120.8(3)  
C24 - C23 - H23 = 119.6

C22 - C23 - H23 = 119.6  
C25 - C24 - C23 = 119.4(3)  
C25 - C24 - H24 = 120.3  
C23 - C24 - H24 = 120.3  
C24 - C25 - C26 = 120.0(3)  
C24 - C25 - H25 = 120  
C26 - C25 - H25 = 120  
C25 - C26 - C27 = 121.4(3)  
C25 - C26 - H26 = 119.3  
C27 - C26 - H26 = 119.3  
C26 - C27 - C22 = 118.2(3)  
C26 - C27 - P2 = 124.5(2)  
C22 - C27 - P2 = 117.0(2)  
C29 - C28 - C33 = 119.3(3)  
C29 - C28 - P2 = 124.9(2)  
C33 - C28 - P2 = 115.8(2)  
C30 - C29 - C28 = 120.2(3)  
C30 - C29 - H29 = 119.9  
C28 - C29 - H29 = 119.9  
C29 - C30 - C31 = 119.9(3)  
C29 - C30 - H30 = 120  
C31 - C30 - H30 = 120  
C32 - C31 - C30 = 120.4(3)  
C32 - C31 - H31 = 119.8  
C30 - C31 - H31 = 119.8  
C31 - C32 - C33 = 119.9(3)  
C31 - C32 - H32 = 120.1  
C33 - C32 - H32 = 120.1  
C32 - C33 - C28 = 120.3(3)  
C32 - C33 - H33 = 119.9  
C28 - C33 - H33 = 119.9  
C39 - C34 - C35 = 118.2(3)  
C39 - C34 - P2 = 125.7(2)  
C35 - C34 - P2 = 116.0(2)  
C34 - C35 - C36 = 120.7(4)  
C34 - C35 - H35 = 119.7  
C36 - C35 - H35 = 119.7  
C37 - C36 - C35 = 120.5(4)  
C37 - C36 - H36 = 119.8  
C35 - C36 - H36 = 119.8  
C38 - C37 - C36 = 119.3(3)  
C38 - C37 - H37 = 120.3  
C36 - C37 - H37 = 120.3  
C37 - C38 - C39 = 120.9(4)  
C37 - C38 - H38 = 119.6  
C39 - C38 - H38 = 119.6  
C34 - C39 - C38 = 120.4(3)  
C34 - C39 - H39 = 119.8  
C38 - C39 - H39 = 119.8  
C42 - C41 - N1 = 112.7(2)  
C42 - C41 - H41A = 109.1  
N1 - C41 - H41A = 109.1  
C42 - C41 - H41B = 109.1  
N1 - C41 - H41B = 109.1  
H41A - C41 - H41B = 107.8  
C43 - C42 - C47 = 119.7(3)  
C43 - C42 - C41 = 118.7(3)  
C47 - C42 - C41 = 121.6(2)



C42 - C43 - C44 = 120.5(3)  
C42 - C43 - H43 = 119.8  
C44 - C43 - H43 = 119.8  
C45 - C44 - C43 = 119.6(3)  
C45 - C44 - H44 = 120.2  
C43 - C44 - H44 = 120.2  
C44 - C45 - C46 = 120.7(3)  
C44 - C45 - H45 = 119.6  
C46 - C45 - H45 = 119.6  
C45 - C46 - C47 = 120.6(3)  
C45 - C46 - H46 = 119.7  
C47 - C46 - H46 = 119.7  
C46 - C47 - C42 = 118.9(3)  
C46 - C47 - P3 = 123.8(2)  
C42 - C47 - P3 = 117.3(2)  
C53 - C48 - C49 = 118.5(3)  
C53 - C48 - P3 = 124.1(2)  
C49 - C48 - P3 = 117.3(2)  
C50 - C49 - C48 = 120.5(3)  
C50 - C49 - H49 = 119.7  
C48 - C49 - H49 = 119.7  
C51 - C50 - C49 = 120.8(3)  
C51 - C50 - H50 = 119.6  
C49 - C50 - H50 = 119.6  
C50 - C51 - C52 = 119.5(3)  
C50 - C51 - H51 = 120.2  
C52 - C51 - H51 = 120.2  
C51 - C52 - C53 = 120.2(3)  
C51 - C52 - H52 = 119.9  
C53 - C52 - H52 = 119.9  
C52 - C53 - C48 = 120.5(3)  
C52 - C53 - H53 = 119.8  
C48 - C53 - H53 = 119.8  
C59 - C54 - C55 = 118.7(3)  
C59 - C54 - P3 = 117.5(2)  
C55 - C54 - P3 = 123.4(3)  
C56 - C55 - C54 = 119.9(4)  
C56 - C55 - H55 = 120.1  
C54 - C55 - H55 = 120.1  
C57 - C56 - C55 = 120.8(4)  
C57 - C56 - H56 = 119.6  
C55 - C56 - H56 = 119.6  
C56 - C57 - C58 = 119.8(4)  
C56 - C57 - H57 = 120.1  
C58 - C57 - H57 = 120.1  
C59 - C58 - C57 = 119.9(4)  
C59 - C58 - H58 = 120.1  
C57 - C58 - H58 = 120.1  
C58 - C59 - C54 = 120.9(4)  
C58 - C59 - H59 = 119.5  
C54 - C59 - H59 = 119.5  
C112 - C101 - C111 = 110.3(2)  
C112 - C101 - C113 = 111.2(2)  
C111 - C101 - C113 = 108.6(3)  
C112 - C101 - H101 = 108.9  
C111 - C101 - H101 = 108.9  
C113 - C101 - H101 = 108.9  
C123 - C201 - C122 = 125.8(3)

C123 - C201 - C121 = 99.4(3)  
C122 - C201 - C121 = 106.0(3)  
C122 - C201 - C128 = 93.7(3)  
C121 - C201 - C128 = 126.2(3)  
C123 - C201 - H201 = 108.1  
C122 - C201 - H201 = 108.1  
C121 - C201 - H201 = 108.1  
C128 - C201 - H201 = 112.4  
C132 - C301 - C131 = 110.8(2)  
C132 - C301 - C133 = 109.5(2)  
C131 - C301 - C133 = 109.4(2)  
C132 - C301 - H301 = 109.1  
C131 - C301 - H301 = 109.1  
C133 - C301 - H301 = 109.1

### Torsion angles [°]

C41 - N1 - C1 - C2 = 57.9(3)  
C21 - N1 - C1 - C2 = -179.9(2)  
N1 - C1 - C2 - C3 = -104.7(3)  
N1 - C1 - C2 - C7 = 79.7(3)  
C7 - C2 - C3 - C4 = 0.6(4)  
C1 - C2 - C3 - C4 = -175.1(3)  
C2 - C3 - C4 - C5 = 1.0(4)  
C3 - C4 - C5 - C6 = -1.7(4)  
C4 - C5 - C6 - C7 = 0.7(4)  
C5 - C6 - C7 - C2 = 0.8(4)  
C5 - C6 - C7 - P1 = -176.7(2)  
C3 - C2 - C7 - C6 = -1.5(4)  
C1 - C2 - C7 - C6 = 174.1(2)  
C3 - C2 - C7 - P1 = 176.2(2)  
C1 - C2 - C7 - P1 = -8.2(3)  
C8 - P1 - C7 - C6 = 11.7(3)  
C14 - P1 - C7 - C6 = -94.5(2)  
C8 - P1 - C7 - C2 = -165.8(2)  
C14 - P1 - C7 - C2 = 87.9(2)  
C14 - P1 - C8 - C9 = 15.5(3)  
C7 - P1 - C8 - C9 = -90.9(3)  
C14 - P1 - C8 - C13 = -161.1(3)  
C7 - P1 - C8 - C13 = 92.5(3)  
C13 - C8 - C9 - C10 = 0.0(5)  
P1 - C8 - C9 - C10 = -176.5(3)  
C8 - C9 - C10 - C11 = -0.9(6)  
C9 - C10 - C11 - C12 = 0.5(6)  
C10 - C11 - C12 - C13 = 0.8(7)  
C11 - C12 - C13 - C8 = -1.7(6)  
C9 - C8 - C13 - C12 = 1.3(5)  
P1 - C8 - C13 - C12 = 178.0(3)  
C8 - P1 - C14 - C19 = -92.3(3)  
C7 - P1 - C14 - C19 = 14.4(3)  
C8 - P1 - C14 - C15 = 87.7(3)  
C7 - P1 - C14 - C15 = -165.6(2)  
C19 - C14 - C15 - C16 = -0.3(5)  
P1 - C14 - C15 - C16 = 179.7(3)  
C14 - C15 - C16 - C17 = 0.0(5)

C15 - C16 - C17 - C18 = 1.2(6)  
C16 - C17 - C18 - C19 = -1.9(7)  
C15 - C14 - C19 - C18 = -0.4(6)  
P1 - C14 - C19 - C18 = 179.6(3)  
C17 - C18 - C19 - C14 = 1.5(7)  
C1 - N1 - C21 - C22 = 58.4(3)  
C41 - N1 - C21 - C22 = -178.8(2)  
N1 - C21 - C22 - C23 = -100.8(3)  
N1 - C21 - C22 - C27 = 78.6(3)  
C27 - C22 - C23 - C24 = -1.8(4)  
C21 - C22 - C23 - C24 = 177.7(3)  
C22 - C23 - C24 - C25 = 1.6(4)  
C23 - C24 - C25 - C26 = -0.4(5)  
C24 - C25 - C26 - C27 = -0.6(5)  
C25 - C26 - C27 - C22 = 0.5(4)  
C25 - C26 - C27 - P2 = -173.6(2)  
C23 - C22 - C27 - C26 = 0.7(4)  
C21 - C22 - C27 - C26 = -178.8(3)  
C23 - C22 - C27 - P2 = 175.2(2)  
C21 - C22 - C27 - P2 = -4.3(3)  
C28 - P2 - C27 - C26 = 7.9(3)  
C34 - P2 - C27 - C26 = -100.5(3)  
C28 - P2 - C27 - C22 = -166.2(2)  
C34 - P2 - C27 - C22 = 85.4(2)  
C34 - P2 - C28 - C29 = 35.8(3)  
C27 - P2 - C28 - C29 = -72.0(3)  
C34 - P2 - C28 - C33 = -143.5(2)  
C27 - P2 - C28 - C33 = 108.8(2)  
C33 - C28 - C29 - C30 = -0.7(4)  
P2 - C28 - C29 - C30 = -179.9(2)  
C28 - C29 - C30 - C31 = 0.4(5)  
C29 - C30 - C31 - C32 = 0.1(5)  
C30 - C31 - C32 - C33 = -0.1(5)  
C31 - C32 - C33 - C28 = -0.2(5)  
C29 - C28 - C33 - C32 = 0.7(5)  
P2 - C28 - C33 - C32 = 180.0(3)  
C28 - P2 - C34 - C39 = -100.7(4)  
C27 - P2 - C34 - C39 = 6.9(4)  
C28 - P2 - C34 - C35 = 84.0(3)  
C27 - P2 - C34 - C35 = -168.4(3)  
C39 - C34 - C35 - C36 = 1.4(7)  
P2 - C34 - C35 - C36 = 177.1(4)  
C34 - C35 - C36 - C37 = -1.3(8)  
C35 - C36 - C37 - C38 = -0.1(8)  
C36 - C37 - C38 - C39 = 1.4(8)  
C35 - C34 - C39 - C38 = -0.1(7)  
P2 - C34 - C39 - C38 = -175.3(4)  
C37 - C38 - C39 - C34 = -1.3(8)  
C1 - N1 - C41 - C42 = -174.8(2)  
C21 - N1 - C41 - C42 = 63.6(3)  
N1 - C41 - C42 - C43 = -98.2(3)  
N1 - C41 - C42 - C47 = 83.7(3)  
C47 - C42 - C43 - C44 = -2.2(4)  
C41 - C42 - C43 - C44 = 179.6(3)  
C42 - C43 - C44 - C45 = 2.1(5)  
C43 - C44 - C45 - C46 = -0.7(5)  
C44 - C45 - C46 - C47 = -0.6(6)  
C45 - C46 - C47 - C42 = 0.5(5)

C45 - C46 - C47 - P3 = -178.9 (3)  
C43 - C42 - C47 - C46 = 0.9 (4)  
C41 - C42 - C47 - C46 = 179.0 (3)  
C43 - C42 - C47 - P3 = -179.7 (2)  
C41 - C42 - C47 - P3 = -1.6 (4)  
C54 - P3 - C47 - C46 = 6.8 (3)  
C48 - P3 - C47 - C46 = -100.7 (3)  
C54 - P3 - C47 - C42 = -172.5 (2)  
C48 - P3 - C47 - C42 = 79.9 (2)  
C54 - P3 - C48 - C53 = -86.6 (3)  
C47 - P3 - C48 - C53 = 21.3 (3)  
C54 - P3 - C48 - C49 = 97.5 (3)  
C47 - P3 - C48 - C49 = -154.6 (2)  
C53 - C48 - C49 - C50 = 0.4 (5)  
P3 - C48 - C49 - C50 = 176.5 (3)  
C48 - C49 - C50 - C51 = -0.9 (5)  
C49 - C50 - C51 - C52 = 0.6 (5)  
C50 - C51 - C52 - C53 = 0.2 (5)  
C51 - C52 - C53 - C48 = -0.7 (5)  
C49 - C48 - C53 - C52 = 0.4 (5)  
P3 - C48 - C53 - C52 = -175.4 (2)  
C48 - P3 - C54 - C59 = -179.3 (2)  
C47 - P3 - C54 - C59 = 75.4 (3)  
C48 - P3 - C54 - C55 = -6.9 (3)  
C47 - P3 - C54 - C55 = -112.2 (3)  
C59 - C54 - C55 - C56 = 0.1 (5)  
P3 - C54 - C55 - C56 = -172.3 (3)  
C54 - C55 - C56 - C57 = -0.7 (6)  
C55 - C56 - C57 - C58 = 0.5 (6)  
C56 - C57 - C58 - C59 = 0.4 (6)  
C57 - C58 - C59 - C54 = -1.1 (5)  
C55 - C54 - C59 - C58 = 0.8 (5)  
P3 - C54 - C59 - C58 = 173.7 (3)

## Complex 2: Crystal structure

### report

#### X-ray crystallographic study

(C<sub>39</sub> H<sub>34</sub> Cl N<sub>3</sub> O Zn, C<sub>6</sub> H<sub>6</sub>);  $M = 739.62$ . APEXII, Bruker-AXS diffractometer, Mo-K $\alpha$  radiation ( $\lambda = 0.71073 \text{ \AA}$ ),  $T = 150(2) \text{ K}$ ; monoclinic  $P2_1/n$  (I.T.#14),  $a = 9.1363(15)$ ,  $b = 22.025(5)$ ,  $c = 19.679(4) \text{ \AA}$ ,  $\beta = 91.470(11)^\circ$ ,  $V = 3958.6(14) \text{ \AA}^3$ ,  $Z = 4$ ,  $d = 1.241 \text{ g.cm}^{-3}$ ,  $\mu = 0.725 \text{ mm}^{-1}$ . The structure was solved by direct methods using the *SIR97* program [1], and then refined with full-matrix least-square methods based on  $F^2$  (*SHELXL-97*) [2] with the aid of the *WINGX* [3] program. The contribution of the disordered solvents to the calculated structure factors was estimated following the *BYPASS* algorithm [4], implemented as the *SQUEEZE* option in *PLATON* [5]. A new data set, free of solvent contribution, was then used in the final refinement. All non-hydrogen atoms were refined with anisotropic atomic displacement parameters. H atoms were finally included in their calculated positions. A final refinement on  $F^2$  with 8975 unique intensities and 407 parameters converged at  $\omega R(F^2) = 0.2197$  ( $R(F) = 0.0986$ ) for 3230 observed reflections with  $I > 2\sigma(I)$ .

[1] A. Altomare, M. C. Burla, M. Camalli, G. Cascarano, C. Giacovazzo, A. Guagliardi, A. G. G. Moliterni, G. Polidori, R. Spagna, *J. Appl. Cryst.* (1999) 32, 115-119

[2] Sheldrick G.M., *Acta Cryst. A*64 (2008), 112-122

[3] L. J. Farrugia, *J. Appl. Cryst.*, 1999, 32, 837-838

[4] P. v.d. Sluis and A.L. Spek, *Acta Cryst.* (1990) A46, 194-201

[5] A. L. Spek, *J. Appl. Cryst.* (2003), 36, 7-13

#### Structural data

|                             |                                                                                                                                                                     |
|-----------------------------|---------------------------------------------------------------------------------------------------------------------------------------------------------------------|
| Empirical formula           | C <sub>45</sub> H <sub>40</sub> Cl N <sub>3</sub> O Zn                                                                                                              |
| Extended formula            | C <sub>39</sub> H <sub>34</sub> Cl N <sub>3</sub> O Zn, C <sub>6</sub> H <sub>6</sub>                                                                               |
| Formula weight              | 739.62                                                                                                                                                              |
| Temperature                 | 150(2) K                                                                                                                                                            |
| Wavelength                  | 0.71073 Å                                                                                                                                                           |
| Crystal system, space group | monoclinic, $P 2_1/n$                                                                                                                                               |
| Unit cell dimensions        | $a = 9.1363(15) \text{ \AA}$ , $\alpha = 90^\circ$<br>$b = 22.025(5) \text{ \AA}$ , $\beta = 91.470(11)^\circ$<br>$c = 19.679(4) \text{ \AA}$ , $\gamma = 90^\circ$ |
| Volume                      | 3958.6(14) Å <sup>3</sup>                                                                                                                                           |
| $Z$ , Calculated density    | 4, 1.241 (g.cm <sup>-3</sup> )                                                                                                                                      |
| Absorption coefficient      | 0.725 mm <sup>-1</sup>                                                                                                                                              |
| $F(000)$                    | 1544                                                                                                                                                                |

Crystal size 0.1 x 0.1 x 0.1 mm  
Crystal color colorless  
Theta range for data collection 1.39 to 27.6 °  
h\_min, h\_max -11 , 11  
k\_min, k\_max -28 , 27  
l\_min, l\_max -25 , 25  
Reflections collected / unique 42068 / 8975 [R(int) = 0.2219]  
Completeness to theta\_max 0.978  
Absorption correction type multi-scan  
Max. and min. transmission 0.930 , 0.921  
Refinement method Full-matrix least-squares on  $F^2$   
Data / restraints / parameters 8975 / 0 / 407  
Goodness-of-fit 0.912  
Final R indices [ $I > 2\sigma$ ]  $R1^a = 0.0986$ ,  $wR2^b = 0.2197$   
R indices (all data)  $R1^a = 0.2295$ ,  $wR2^b = 0.2549$   
Largest diff. peak and hole 0.798 and -1.086 e.Å<sup>-3</sup>

$$^aR1 = \sum | |F_o| - |F_c| | / \sum |F_o|$$

$$^b wR2 = \{ \sum [w(F_o^2 - F_c^2)^2] / \sum [w(F_o^2)^2] \}^{1/2}$$

Atomic coordinates, site occupancy (%) and equivalent isotropic displacement parameters (Å<sup>2</sup> x 10<sup>3</sup>). U(eq) is defined as one third of the trace of the orthogonalized  $U_{ij}$  tensor.

| Atom | x           | y            | z            | occ. | U (eq)      |
|------|-------------|--------------|--------------|------|-------------|
| Zn1  | 0.11039 (9) | 0.24654 (4)  | 0.73454 (4)  | 1    | 0.0196 (3)  |
| C11  | -0.0382 (2) | 0.27199 (12) | 0.64585 (12) | 1    | 0.0537 (7)  |
| N1   | 0.0424 (6)  | 0.1543 (3)   | 0.7469 (3)   | 1    | 0.0167 (14) |
| C2   | -0.0892 (9) | 0.1331 (4)   | 0.7255 (4)   | 1    | 0.0304 (10) |
| H2   | -0.1582     | 0.1604       | 0.7055       | 1    | 0.036       |
| C3   | -0.1267 (9) | 0.0719 (4)   | 0.7322 (4)   | 1    | 0.0304 (10) |
| H3   | -0.2188     | 0.0576       | 0.7154       | 1    | 0.036       |
| C4   | -0.0303 (8) | 0.0332 (4)   | 0.7626 (4)   | 1    | 0.0304 (10) |
| H4   | -0.0544     | -0.0085      | 0.7681       | 1    | 0.036       |
| C5   | 0.1031 (8)  | 0.0552 (4)   | 0.7856 (4)   | 1    | 0.0304 (10) |
| H5   | 0.1715      | 0.029        | 0.808        | 1    | 0.036       |
| C6   | 0.1367 (9)  | 0.1155 (4)   | 0.7756 (4)   | 1    | 0.0304 (10) |
| C7   | 0.2855 (7)  | 0.1406 (3)   | 0.7937 (4)   | 1    | 0.0174 (17) |
| H7A  | 0.327       | 0.1184       | 0.8334       | 1    | 0.021       |
| H7B  | 0.3514      | 0.1344       | 0.7551       | 1    | 0.021       |
| N11  | 0.3151 (6)  | 0.2544 (3)   | 0.6866 (3)   | 1    | 0.0219 (14) |
| C12  | 0.3250 (9)  | 0.2654 (3)   | 0.6207 (4)   | 1    | 0.028 (2)   |
| H12  | 0.2379      | 0.2725       | 0.5945       | 1    | 0.033       |
| C13  | 0.4582 (9)  | 0.2668 (4)   | 0.5886 (4)   | 1    | 0.034 (2)   |
| H13  | 0.4616      | 0.2728       | 0.5409       | 1    | 0.04        |
| C14  | 0.5846 (8)  | 0.2595 (4)   | 0.6263 (4)   | 1    | 0.027 (2)   |
| H14  | 0.6774      | 0.2616       | 0.6058       | 1    | 0.032       |
| C15  | 0.5738 (8)  | 0.2489 (4)   | 0.6950 (4)   | 1    | 0.0285 (18) |
| H15  | 0.6604      | 0.2435       | 0.7221       | 1    | 0.034       |
| C16  | 0.4394 (7)  | 0.2460 (3)   | 0.7250 (3)   | 1    | 0.0170 (16) |
| C17  | 0.4193 (7)  | 0.2358 (3)   | 0.7992 (3)   | 1    | 0.0188 (18) |
| H17A | 0.4999      | 0.2101       | 0.8177       | 1    | 0.023       |

|      |             |            |            |   |             |
|------|-------------|------------|------------|---|-------------|
| H17B | 0.4221      | 0.2751     | 0.8235     | 1 | 0.023       |
| N18  | 0.2776 (6)  | 0.2056 (3) | 0.8097 (3) | 1 | 0.0168 (14) |
| O21  | 0.0555 (5)  | 0.3035 (2) | 0.8037 (2) | 1 | 0.0156 (11) |
| C22  | 0.1285 (7)  | 0.3193 (3) | 0.8601 (3) | 1 | 0.0155 (7)  |
| C23  | 0.1263 (7)  | 0.3824 (3) | 0.8812 (3) | 1 | 0.0155 (7)  |
| C24  | 0.1915 (7)  | 0.3966 (3) | 0.9437 (3) | 1 | 0.0155 (7)  |
| H24  | 0.1858      | 0.4374     | 0.9589     | 1 | 0.019       |
| C25  | 0.2640 (7)  | 0.3553 (3) | 0.9852 (3) | 1 | 0.0155 (7)  |
| C26  | 0.2748 (7)  | 0.2963 (3) | 0.9621 (3) | 1 | 0.0155 (7)  |
| H26  | 0.3289      | 0.2676     | 0.9886     | 1 | 0.019       |
| C27  | 0.2084 (7)  | 0.2779 (3) | 0.9012 (3) | 1 | 0.0155 (7)  |
| C28  | 0.3364 (7)  | 0.3751 (4) | 1.0512 (3) | 1 | 0.0238 (19) |
| H28A | 0.3449      | 0.4195     | 1.0519     | 1 | 0.036       |
| H28B | 0.4342      | 0.357      | 1.0554     | 1 | 0.036       |
| H28C | 0.2772      | 0.3618     | 1.0893     | 1 | 0.036       |
| C29  | 0.2224 (7)  | 0.2125 (3) | 0.8806 (3) | 1 | 0.0174 (17) |
| H29A | 0.1256      | 0.1926     | 0.8833     | 1 | 0.021       |
| H29B | 0.2904      | 0.1916     | 0.9128     | 1 | 0.021       |
| C40  | 0.0446 (7)  | 0.4300 (3) | 0.8376 (3) | 1 | 0.0159 (17) |
| C41  | 0.0918 (7)  | 0.4949 (3) | 0.8617 (3) | 1 | 0.0147 (17) |
| C42  | 0.0001 (8)  | 0.5410 (4) | 0.8806 (4) | 1 | 0.0231 (19) |
| H42  | -0.1025     | 0.534      | 0.8792     | 1 | 0.028       |
| C43  | 0.0514 (8)  | 0.5969 (4) | 0.9016 (4) | 1 | 0.028 (2)   |
| H43  | -0.0155     | 0.6271     | 0.9158     | 1 | 0.033       |
| C44  | 0.1979 (9)  | 0.6092 (4) | 0.9020 (4) | 1 | 0.029 (2)   |
| H44  | 0.233       | 0.6478     | 0.9166     | 1 | 0.035       |
| C45  | 0.2965 (9)  | 0.5646 (4) | 0.8809 (4) | 1 | 0.028 (2)   |
| H45  | 0.3986      | 0.5728     | 0.8803     | 1 | 0.034       |
| C46  | 0.2432 (8)  | 0.5093 (3) | 0.8614 (4) | 1 | 0.0221 (18) |
| H46  | 0.3101      | 0.4791     | 0.8471     | 1 | 0.027       |
| C51  | -0.1192 (7) | 0.4191 (3) | 0.8464 (3) | 1 | 0.0152 (17) |
| C52  | -0.2076 (7) | 0.3949 (3) | 0.7948 (4) | 1 | 0.0169 (17) |
| H52  | -0.1669     | 0.3847     | 0.7523     | 1 | 0.02        |
| C53  | -0.3551 (8) | 0.3855 (4) | 0.8051 (4) | 1 | 0.0247 (19) |
| H53  | -0.4158     | 0.3709     | 0.7688     | 1 | 0.03        |
| C54  | -0.4152 (7) | 0.3969 (4) | 0.8671 (4) | 1 | 0.0221 (19) |
| H54  | -0.5165     | 0.3897     | 0.8734     | 1 | 0.026       |
| C55  | -0.3298 (7) | 0.4185 (4) | 0.9196 (4) | 1 | 0.027 (2)   |
| H55  | -0.3711     | 0.427      | 0.9624     | 1 | 0.033       |
| C56  | -0.1793 (8) | 0.4280 (4) | 0.9095 (4) | 1 | 0.0250 (19) |
| H56  | -0.1181     | 0.4407     | 0.9466     | 1 | 0.03        |
| C61  | 0.0923 (7)  | 0.4309 (3) | 0.7616 (3) | 1 | 0.0169 (17) |
| C62  | 0.2170 (7)  | 0.4011 (3) | 0.7404 (4) | 1 | 0.0195 (18) |
| H62  | 0.2728      | 0.3769     | 0.7716     | 1 | 0.023       |
| C63  | 0.2603 (8)  | 0.4068 (4) | 0.6733 (4) | 1 | 0.0256 (19) |
| H63  | 0.3476      | 0.3872     | 0.6599     | 1 | 0.031       |
| C64  | 0.1808 (9)  | 0.4398 (4) | 0.6257 (4) | 1 | 0.031 (2)   |
| H64  | 0.2092      | 0.4414     | 0.5796     | 1 | 0.037       |
| C65  | 0.0568 (9)  | 0.4710 (4) | 0.6475 (4) | 1 | 0.039 (2)   |
| H65  | 0.0009      | 0.4948     | 0.616      | 1 | 0.046       |
| C66  | 0.0147 (7)  | 0.4672 (4) | 0.7152 (4) | 1 | 0.0235 (19) |
| H66  | -0.0675     | 0.4897     | 0.7298     | 1 | 0.028       |
| C101 | 0.8151 (9)  | 0.2103 (5) | 0.8762 (5) | 1 | 0.045 (3)   |
| H101 | 0.8859      | 0.2177     | 0.8426     | 1 | 0.054       |
| C102 | 0.7708 (9)  | 0.1502 (4) | 0.8923 (5) | 1 | 0.043 (2)   |
| H102 | 0.8126      | 0.1171     | 0.8687     | 1 | 0.052       |
| C103 | 0.6690 (9)  | 0.1387 (4) | 0.9410 (4) | 1 | 0.042 (2)   |
| H103 | 0.6411      | 0.0982     | 0.9511     | 1 | 0.051       |

|      |            |            |            |   |           |
|------|------------|------------|------------|---|-----------|
| C104 | 0.6079 (9) | 0.1872 (5) | 0.9752 (4) | 1 | 0.043 (3) |
| H104 | 0.5366     | 0.1804     | 1.0087     | 1 | 0.051     |
| C105 | 0.6515 (8) | 0.2451 (5) | 0.9601 (4) | 1 | 0.038 (2) |
| H105 | 0.6111     | 0.2781     | 0.9845     | 1 | 0.046     |
| C106 | 0.7523 (8) | 0.2571 (4) | 0.9106 (4) | 1 | 0.036 (2) |
| H106 | 0.778      | 0.2979     | 0.9006     | 1 | 0.043     |

Anisotropic displacement parameters (Å<sup>2</sup>)

The anisotropic displacement factor exponent takes the form:

$$-2\pi^2 [h^2 a^{*2} U_{11} + \dots + 2 h k a^* b^* U_{12}].$$

| Atom | U11         | U22         | U33         | U23          | U13         | U12          |
|------|-------------|-------------|-------------|--------------|-------------|--------------|
| Zn1  | 0.0206 (5)  | 0.0188 (5)  | 0.0195 (4)  | -0.0017 (5)  | 0.0054 (3)  | -0.0030 (4)  |
| C11  | 0.0418 (14) | 0.076 (2)   | 0.0433 (14) | -0.0025 (13) | 0.0019 (11) | -0.0063 (13) |
| N1   | 0.015 (3)   | 0.021 (4)   | 0.014 (3)   | 0.000 (3)    | 0.003 (2)   | -0.001 (3)   |
| C2   | 0.040 (2)   | 0.029 (3)   | 0.023 (2)   | -0.0099 (19) | 0.0120 (17) | -0.0106 (19) |
| C3   | 0.040 (2)   | 0.029 (3)   | 0.023 (2)   | -0.0099 (19) | 0.0120 (17) | -0.0106 (19) |
| C4   | 0.040 (2)   | 0.029 (3)   | 0.023 (2)   | -0.0099 (19) | 0.0120 (17) | -0.0106 (19) |
| C5   | 0.040 (2)   | 0.029 (3)   | 0.023 (2)   | -0.0099 (19) | 0.0120 (17) | -0.0106 (19) |
| C6   | 0.040 (2)   | 0.029 (3)   | 0.023 (2)   | -0.0099 (19) | 0.0120 (17) | -0.0106 (19) |
| C7   | 0.019 (4)   | 0.014 (5)   | 0.019 (4)   | -0.002 (3)   | -0.002 (3)  | 0.002 (3)    |
| N11  | 0.026 (3)   | 0.022 (4)   | 0.019 (3)   | -0.007 (3)   | 0.004 (3)   | -0.002 (3)   |
| C12  | 0.037 (5)   | 0.025 (6)   | 0.022 (4)   | -0.003 (4)   | 0.003 (4)   | -0.009 (4)   |
| C13  | 0.045 (6)   | 0.034 (6)   | 0.023 (4)   | -0.007 (4)   | 0.015 (4)   | -0.006 (4)   |
| C14  | 0.026 (4)   | 0.024 (6)   | 0.030 (4)   | -0.007 (4)   | 0.016 (4)   | -0.003 (4)   |
| C15  | 0.031 (5)   | 0.021 (5)   | 0.034 (4)   | 0.000 (4)    | 0.010 (4)   | 0.005 (4)    |
| C16  | 0.017 (4)   | 0.015 (4)   | 0.019 (4)   | 0.000 (4)    | 0.006 (3)   | -0.003 (4)   |
| C17  | 0.016 (4)   | 0.021 (5)   | 0.019 (4)   | -0.005 (3)   | -0.001 (3)  | 0.003 (3)    |
| N18  | 0.013 (3)   | 0.026 (4)   | 0.012 (3)   | 0.003 (3)    | 0.007 (2)   | 0.002 (3)    |
| O21  | 0.020 (3)   | 0.011 (3)   | 0.016 (3)   | -0.002 (2)   | 0.001 (2)   | -0.001 (2)   |
| C22  | 0.0100 (15) | 0.0175 (18) | 0.0192 (15) | 0.0012 (14)  | 0.0060 (11) | 0.0032 (13)  |
| C23  | 0.0100 (15) | 0.0175 (18) | 0.0192 (15) | 0.0012 (14)  | 0.0060 (11) | 0.0032 (13)  |
| C24  | 0.0100 (15) | 0.0175 (18) | 0.0192 (15) | 0.0012 (14)  | 0.0060 (11) | 0.0032 (13)  |
| C25  | 0.0100 (15) | 0.0175 (18) | 0.0192 (15) | 0.0012 (14)  | 0.0060 (11) | 0.0032 (13)  |
| C26  | 0.0100 (15) | 0.0175 (18) | 0.0192 (15) | 0.0012 (14)  | 0.0060 (11) | 0.0032 (13)  |
| C27  | 0.0100 (15) | 0.0175 (18) | 0.0192 (15) | 0.0012 (14)  | 0.0060 (11) | 0.0032 (13)  |
| C28  | 0.017 (4)   | 0.042 (6)   | 0.012 (4)   | 0.007 (4)    | -0.002 (3)  | 0.006 (4)    |
| C29  | 0.022 (4)   | 0.017 (5)   | 0.013 (4)   | 0.007 (3)    | 0.006 (3)   | 0.007 (3)    |
| C40  | 0.021 (4)   | 0.012 (4)   | 0.014 (4)   | -0.003 (3)   | 0.007 (3)   | -0.002 (3)   |
| C41  | 0.010 (4)   | 0.022 (5)   | 0.012 (4)   | 0.004 (3)    | 0.001 (3)   | -0.001 (3)   |
| C42  | 0.017 (4)   | 0.027 (5)   | 0.024 (4)   | -0.010 (4)   | -0.004 (3)  | 0.007 (4)    |
| C43  | 0.026 (5)   | 0.018 (5)   | 0.039 (5)   | -0.006 (4)   | 0.006 (4)   | 0.007 (4)    |
| C44  | 0.051 (6)   | 0.011 (5)   | 0.025 (5)   | 0.009 (4)    | -0.004 (4)  | -0.007 (4)   |
| C45  | 0.039 (5)   | 0.019 (5)   | 0.026 (5)   | -0.003 (4)   | 0.007 (4)   | -0.006 (4)   |
| C46  | 0.025 (5)   | 0.018 (5)   | 0.023 (4)   | -0.003 (4)   | 0.003 (3)   | 0.003 (4)    |
| C51  | 0.011 (4)   | 0.016 (4)   | 0.019 (4)   | 0.002 (3)    | 0.005 (3)   | 0.003 (3)    |
| C52  | 0.008 (4)   | 0.017 (5)   | 0.026 (4)   | 0.005 (3)    | 0.000 (3)   | 0.003 (3)    |
| C53  | 0.028 (5)   | 0.027 (5)   | 0.019 (4)   | 0.008 (4)    | -0.008 (3)  | -0.003 (4)   |



|      |           |           |           |            |            |            |
|------|-----------|-----------|-----------|------------|------------|------------|
| C54  | 0.004 (4) | 0.034 (5) | 0.029 (5) | -0.003 (4) | -0.001 (3) | 0.009 (3)  |
| C55  | 0.013 (4) | 0.038 (6) | 0.031 (5) | 0.005 (4)  | 0.007 (3)  | 0.001 (4)  |
| C56  | 0.022 (5) | 0.031 (5) | 0.023 (4) | 0.003 (4)  | 0.003 (3)  | 0.003 (4)  |
| C61  | 0.023 (4) | 0.016 (5) | 0.012 (4) | -0.004 (3) | 0.002 (3)  | -0.015 (3) |
| C62  | 0.020 (4) | 0.013 (5) | 0.025 (4) | 0.006 (3)  | 0.002 (3)  | -0.005 (3) |
| C63  | 0.031 (5) | 0.022 (5) | 0.024 (5) | -0.007 (4) | 0.008 (4)  | -0.009 (4) |
| C64  | 0.042 (6) | 0.038 (6) | 0.012 (4) | 0.006 (4)  | 0.005 (4)  | -0.013 (4) |
| C65  | 0.036 (5) | 0.058 (7) | 0.022 (5) | 0.006 (4)  | -0.004 (4) | 0.004 (5)  |
| C66  | 0.016 (4) | 0.035 (6) | 0.019 (4) | 0.008 (4)  | -0.003 (3) | 0.003 (4)  |
| C101 | 0.041 (6) | 0.059 (8) | 0.035 (6) | 0.004 (5)  | 0.009 (4)  | 0.008 (5)  |
| C102 | 0.047 (6) | 0.037 (7) | 0.046 (6) | -0.007 (5) | 0.014 (5)  | 0.003 (5)  |
| C103 | 0.049 (6) | 0.037 (6) | 0.042 (6) | 0.006 (5)  | 0.012 (5)  | -0.016 (5) |
| C104 | 0.037 (6) | 0.062 (8) | 0.028 (5) | -0.006 (5) | 0.010 (4)  | -0.013 (5) |
| C105 | 0.032 (5) | 0.046 (7) | 0.037 (5) | -0.023 (5) | -0.006 (4) | 0.014 (5)  |
| C106 | 0.033 (5) | 0.044 (7) | 0.032 (5) | -0.002 (5) | 0.007 (4)  | -0.013 (5) |

Bond lengths [Å]

|            |              |
|------------|--------------|
| Zn1 - O21  | = 1.927 (5)  |
| Zn1 - N11  | = 2.123 (6)  |
| Zn1 - N1   | = 2.141 (6)  |
| Zn1 - C11  | = 2.254 (3)  |
| Zn1 - N18  | = 2.285 (5)  |
| N1 - C6    | = 1.329 (9)  |
| N1 - C2    | = 1.346 (9)  |
| C2 - C3    | = 1.398 (10) |
| C2 - H2    | = 0.95       |
| C3 - C4    | = 1.354 (11) |
| C3 - H3    | = 0.95       |
| C4 - C5    | = 1.377 (10) |
| C4 - H4    | = 0.95       |
| C5 - C6    | = 1.379 (11) |
| C5 - H5    | = 0.95       |
| C6 - C7    | = 1.501 (10) |
| C7 - N18   | = 1.469 (9)  |
| C7 - H7A   | = 0.99       |
| C7 - H7B   | = 0.99       |
| N11 - C12  | = 1.326 (9)  |
| N11 - C16  | = 1.360 (8)  |
| C12 - C13  | = 1.385 (10) |
| C12 - H12  | = 0.95       |
| C13 - C14  | = 1.366 (10) |
| C13 - H13  | = 0.95       |
| C14 - C15  | = 1.377 (10) |
| C14 - H14  | = 0.95       |
| C15 - C16  | = 1.377 (9)  |
| C15 - H15  | = 0.95       |
| C16 - C17  | = 1.494 (9)  |
| C17 - N18  | = 1.475 (8)  |
| C17 - H17A | = 0.99       |
| C17 - H17B | = 0.99       |
| N18 - C29  | = 1.503 (8)  |
| O21 - C22  | = 1.328 (8)  |

|             |              |
|-------------|--------------|
| C22 - C27   | = 1.410 (9)  |
| C22 - C23   | = 1.450 (10) |
| C23 - C24   | = 1.388 (9)  |
| C23 - C40   | = 1.537 (9)  |
| C24 - C25   | = 1.381 (9)  |
| C24 - H24   | = 0.95       |
| C25 - C26   | = 1.381 (9)  |
| C25 - C28   | = 1.507 (9)  |
| C26 - C27   | = 1.391 (9)  |
| C26 - H26   | = 0.95       |
| C27 - C29   | = 1.502 (10) |
| C28 - H28A  | = 0.98       |
| C28 - H28B  | = 0.98       |
| C28 - H28C  | = 0.98       |
| C29 - H29A  | = 0.99       |
| C29 - H29B  | = 0.99       |
| C40 - C51   | = 1.530 (9)  |
| C40 - C41   | = 1.563 (10) |
| C40 - C61   | = 1.569 (9)  |
| C41 - C42   | = 1.373 (10) |
| C41 - C46   | = 1.419 (9)  |
| C42 - C43   | = 1.379 (10) |
| C42 - H42   | = 0.95       |
| C43 - C44   | = 1.365 (10) |
| C43 - H43   | = 0.95       |
| C44 - C45   | = 1.403 (11) |
| C44 - H44   | = 0.95       |
| C45 - C46   | = 1.363 (10) |
| C45 - H45   | = 0.95       |
| C46 - H46   | = 0.95       |
| C51 - C56   | = 1.386 (9)  |
| C51 - C52   | = 1.388 (9)  |
| C52 - C53   | = 1.383 (9)  |
| C52 - H52   | = 0.95       |
| C53 - C54   | = 1.373 (10) |
| C53 - H53   | = 0.95       |
| C54 - C55   | = 1.365 (10) |
| C54 - H54   | = 0.95       |
| C55 - C56   | = 1.410 (10) |
| C55 - H55   | = 0.95       |
| C56 - H56   | = 0.95       |
| C61 - C62   | = 1.388 (10) |
| C61 - C66   | = 1.393 (9)  |
| C62 - C63   | = 1.395 (10) |
| C62 - H62   | = 0.95       |
| C63 - C64   | = 1.377 (10) |
| C63 - H63   | = 0.95       |
| C64 - C65   | = 1.401 (11) |
| C64 - H64   | = 0.95       |
| C65 - C66   | = 1.400 (10) |
| C65 - H65   | = 0.95       |
| C66 - H66   | = 0.95       |
| C101 - C106 | = 1.368 (12) |
| C101 - C102 | = 1.422 (12) |
| C101 - H101 | = 0.95       |
| C102 - C103 | = 1.377 (11) |
| C102 - H102 | = 0.95       |
| C103 - C104 | = 1.388 (12) |

C103 - H103 = 0.95  
C104 - C105 = 1.371 (12)  
C104 - H104 = 0.95  
C105 - C106 = 1.383 (11)  
C105 - H105 = 0.95  
C106 - H106 = 0.95

Angles [°]

O21 - Zn1 - N11 = 120.6 (2)  
O21 - Zn1 - N1 = 117.2 (2)  
N11 - Zn1 - N1 = 112.9 (2)  
O21 - Zn1 - C11 = 102.84 (15)  
N11 - Zn1 - C11 = 98.96 (17)  
N1 - Zn1 - C11 = 98.80 (16)  
O21 - Zn1 - N18 = 88.95 (19)  
N11 - Zn1 - N18 = 74.8 (2)  
N1 - Zn1 - N18 = 75.1 (2)  
C11 - Zn1 - N18 = 168.21 (16)  
C6 - N1 - C2 = 118.3 (7)  
C6 - N1 - Zn1 = 118.1 (5)  
C2 - N1 - Zn1 = 123.6 (5)  
N1 - C2 - C3 = 121.6 (8)  
N1 - C2 - H2 = 119.2  
C3 - C2 - H2 = 119.2  
C4 - C3 - C2 = 119.4 (8)  
C4 - C3 - H3 = 120.3  
C2 - C3 - H3 = 120.3  
C3 - C4 - C5 = 118.9 (8)  
C3 - C4 - H4 = 120.5  
C5 - C4 - H4 = 120.5  
C4 - C5 - C6 = 119.4 (8)  
C4 - C5 - H5 = 120.3  
C6 - C5 - H5 = 120.3  
N1 - C6 - C5 = 122.4 (7)  
N1 - C6 - C7 = 116.0 (7)  
C5 - C6 - C7 = 121.6 (8)  
N18 - C7 - C6 = 111.1 (6)  
N18 - C7 - H7A = 109.4  
C6 - C7 - H7A = 109.4  
N18 - C7 - H7B = 109.4  
C6 - C7 - H7B = 109.4  
H7A - C7 - H7B = 108  
C12 - N11 - C16 = 119.4 (6)  
C12 - N11 - Zn1 = 122.2 (5)  
C16 - N11 - Zn1 = 118.4 (4)  
N11 - C12 - C13 = 122.2 (7)  
N11 - C12 - H12 = 118.9  
C13 - C12 - H12 = 118.9  
C14 - C13 - C12 = 119.4 (7)  
C14 - C13 - H13 = 120.3

|      |       |        |             |
|------|-------|--------|-------------|
| C12  | - C13 | - H13  | = 120.3     |
| C13  | - C14 | - C15  | = 118.2 (7) |
| C13  | - C14 | - H14  | = 120.9     |
| C15  | - C14 | - H14  | = 120.9     |
| C16  | - C15 | - C14  | = 121.0 (7) |
| C16  | - C15 | - H15  | = 119.5     |
| C14  | - C15 | - H15  | = 119.5     |
| N11  | - C16 | - C15  | = 119.8 (6) |
| N11  | - C16 | - C17  | = 116.2 (6) |
| C15  | - C16 | - C17  | = 124.0 (6) |
| N18  | - C17 | - C16  | = 109.6 (5) |
| N18  | - C17 | - H17A | = 109.7     |
| C16  | - C17 | - H17A | = 109.7     |
| N18  | - C17 | - H17B | = 109.7     |
| C16  | - C17 | - H17B | = 109.7     |
| H17A | - C17 | - H17B | = 108.2     |
| C7   | - N18 | - C17  | = 111.2 (5) |
| C7   | - N18 | - C29  | = 108.5 (5) |
| C17  | - N18 | - C29  | = 113.7 (5) |
| C7   | - N18 | - Zn1  | = 106.3 (4) |
| C17  | - N18 | - Zn1  | = 107.8 (4) |
| C29  | - N18 | - Zn1  | = 109.0 (4) |
| C22  | - O21 | - Zn1  | = 128.9 (4) |
| O21  | - C22 | - C27  | = 123.4 (7) |
| O21  | - C22 | - C23  | = 118.7 (6) |
| C27  | - C22 | - C23  | = 117.9 (6) |
| C24  | - C23 | - C22  | = 117.4 (6) |
| C24  | - C23 | - C40  | = 122.2 (6) |
| C22  | - C23 | - C40  | = 120.3 (6) |
| C25  | - C24 | - C23  | = 124.4 (7) |
| C25  | - C24 | - H24  | = 117.8     |
| C23  | - C24 | - H24  | = 117.8     |
| C24  | - C25 | - C26  | = 117.5 (6) |
| C24  | - C25 | - C28  | = 120.9 (7) |
| C26  | - C25 | - C28  | = 121.5 (6) |
| C25  | - C26 | - C27  | = 121.7 (7) |
| C25  | - C26 | - H26  | = 119.1     |
| C27  | - C26 | - H26  | = 119.1     |
| C26  | - C27 | - C22  | = 120.8 (7) |
| C26  | - C27 | - C29  | = 118.3 (6) |
| C22  | - C27 | - C29  | = 120.8 (6) |
| C25  | - C28 | - H28A | = 109.5     |
| C25  | - C28 | - H28B | = 109.5     |
| H28A | - C28 | - H28B | = 109.5     |
| C25  | - C28 | - H28C | = 109.5     |
| H28A | - C28 | - H28C | = 109.5     |
| H28B | - C28 | - H28C | = 109.5     |
| C27  | - C29 | - N18  | = 112.3 (6) |
| C27  | - C29 | - H29A | = 109.1     |
| N18  | - C29 | - H29A | = 109.1     |
| C27  | - C29 | - H29B | = 109.1     |
| N18  | - C29 | - H29B | = 109.1     |
| H29A | - C29 | - H29B | = 107.9     |
| C51  | - C40 | - C23  | = 107.0 (5) |
| C51  | - C40 | - C41  | = 111.9 (5) |
| C23  | - C40 | - C41  | = 109.2 (5) |
| C51  | - C40 | - C61  | = 114.0 (5) |
| C23  | - C40 | - C61  | = 113.5 (6) |

|      |        |        |             |
|------|--------|--------|-------------|
| C41  | - C40  | - C61  | = 101.4 (5) |
| C42  | - C41  | - C46  | = 116.0 (7) |
| C42  | - C41  | - C40  | = 126.3 (6) |
| C46  | - C41  | - C40  | = 117.6 (6) |
| C41  | - C42  | - C43  | = 122.5 (7) |
| C41  | - C42  | - H42  | = 118.8     |
| C43  | - C42  | - H42  | = 118.8     |
| C44  | - C43  | - C42  | = 120.3 (7) |
| C44  | - C43  | - H43  | = 119.9     |
| C42  | - C43  | - H43  | = 119.9     |
| C43  | - C44  | - C45  | = 119.8 (8) |
| C43  | - C44  | - H44  | = 120.1     |
| C45  | - C44  | - H44  | = 120.1     |
| C46  | - C45  | - C44  | = 118.8 (8) |
| C46  | - C45  | - H45  | = 120.6     |
| C44  | - C45  | - H45  | = 120.6     |
| C45  | - C46  | - C41  | = 122.6 (7) |
| C45  | - C46  | - H46  | = 118.7     |
| C41  | - C46  | - H46  | = 118.7     |
| C56  | - C51  | - C52  | = 118.3 (6) |
| C56  | - C51  | - C40  | = 119.4 (6) |
| C52  | - C51  | - C40  | = 122.0 (6) |
| C53  | - C52  | - C51  | = 120.0 (7) |
| C53  | - C52  | - H52  | = 120       |
| C51  | - C52  | - H52  | = 120       |
| C54  | - C53  | - C52  | = 121.2 (7) |
| C54  | - C53  | - H53  | = 119.4     |
| C52  | - C53  | - H53  | = 119.4     |
| C55  | - C54  | - C53  | = 120.1 (7) |
| C55  | - C54  | - H54  | = 119.9     |
| C53  | - C54  | - H54  | = 119.9     |
| C54  | - C55  | - C56  | = 119.1 (7) |
| C54  | - C55  | - H55  | = 120.4     |
| C56  | - C55  | - H55  | = 120.4     |
| C51  | - C56  | - C55  | = 121.0 (7) |
| C51  | - C56  | - H56  | = 119.5     |
| C55  | - C56  | - H56  | = 119.5     |
| C62  | - C61  | - C66  | = 118.9 (7) |
| C62  | - C61  | - C40  | = 122.0 (6) |
| C66  | - C61  | - C40  | = 118.8 (6) |
| C61  | - C62  | - C63  | = 119.7 (7) |
| C61  | - C62  | - H62  | = 120.1     |
| C63  | - C62  | - H62  | = 120.1     |
| C64  | - C63  | - C62  | = 122.3 (7) |
| C64  | - C63  | - H63  | = 118.9     |
| C62  | - C63  | - H63  | = 118.9     |
| C63  | - C64  | - C65  | = 117.9 (7) |
| C63  | - C64  | - H64  | = 121.1     |
| C65  | - C64  | - H64  | = 121.1     |
| C66  | - C65  | - C64  | = 120.4 (8) |
| C66  | - C65  | - H65  | = 119.8     |
| C64  | - C65  | - H65  | = 119.8     |
| C61  | - C66  | - C65  | = 120.6 (7) |
| C61  | - C66  | - H66  | = 119.7     |
| C65  | - C66  | - H66  | = 119.7     |
| C106 | - C101 | - C102 | = 117.7 (9) |
| C106 | - C101 | - H101 | = 121.1     |
| C102 | - C101 | - H101 | = 121.1     |

|      |   |      |   |      |   |           |
|------|---|------|---|------|---|-----------|
| C103 | - | C102 | - | C101 | = | 121.9 (9) |
| C103 | - | C102 | - | H102 | = | 119       |
| C101 | - | C102 | - | H102 | = | 119       |
| C102 | - | C103 | - | C104 | = | 118.8 (9) |
| C102 | - | C103 | - | H103 | = | 120.6     |
| C104 | - | C103 | - | H103 | = | 120.6     |
| C105 | - | C104 | - | C103 | = | 119.3 (8) |
| C105 | - | C104 | - | H104 | = | 120.3     |
| C103 | - | C104 | - | H104 | = | 120.3     |
| C104 | - | C105 | - | C106 | = | 122.2 (8) |
| C104 | - | C105 | - | H105 | = | 118.9     |
| C106 | - | C105 | - | H105 | = | 118.9     |
| C101 | - | C106 | - | C105 | = | 120.0 (9) |
| C101 | - | C106 | - | H106 | = | 120       |
| C105 | - | C106 | - | H106 | = | 120       |

Torsion angles [°]

|     |   |     |   |     |   |     |   |            |
|-----|---|-----|---|-----|---|-----|---|------------|
| O21 | - | Zn1 | - | N1  | - | C6  | = | -95.9 (5)  |
| N11 | - | Zn1 | - | N1  | - | C6  | = | 51.0 (6)   |
| C11 | - | Zn1 | - | N1  | - | C6  | = | 154.7 (5)  |
| N18 | - | Zn1 | - | N1  | - | C6  | = | -15.0 (5)  |
| O21 | - | Zn1 | - | N1  | - | C2  | = | 85.9 (6)   |
| N11 | - | Zn1 | - | N1  | - | C2  | = | -127.2 (5) |
| C11 | - | Zn1 | - | N1  | - | C2  | = | -23.5 (5)  |
| N18 | - | Zn1 | - | N1  | - | C2  | = | 166.8 (6)  |
| C6  | - | N1  | - | C2  | - | C3  | = | -0.9 (10)  |
| Zn1 | - | N1  | - | C2  | - | C3  | = | 177.3 (5)  |
| N1  | - | C2  | - | C3  | - | C4  | = | 2.1 (11)   |
| C2  | - | C3  | - | C4  | - | C5  | = | -0.8 (11)  |
| C3  | - | C4  | - | C5  | - | C6  | = | -1.5 (11)  |
| C2  | - | N1  | - | C6  | - | C5  | = | -1.6 (10)  |
| Zn1 | - | N1  | - | C6  | - | C5  | = | -179.9 (6) |
| C2  | - | N1  | - | C6  | - | C7  | = | 175.7 (6)  |
| Zn1 | - | N1  | - | C6  | - | C7  | = | -2.6 (8)   |
| C4  | - | C5  | - | C6  | - | N1  | = | 2.8 (11)   |
| C4  | - | C5  | - | C6  | - | C7  | = | -174.3 (7) |
| N1  | - | C6  | - | C7  | - | N18 | = | 29.7 (9)   |
| C5  | - | C6  | - | C7  | - | N18 | = | -153.0 (7) |
| O21 | - | Zn1 | - | N11 | - | C12 | = | -116.7 (6) |
| N1  | - | Zn1 | - | N11 | - | C12 | = | 97.6 (6)   |
| C11 | - | Zn1 | - | N11 | - | C12 | = | -5.9 (6)   |
| N18 | - | Zn1 | - | N11 | - | C12 | = | 163.8 (6)  |
| O21 | - | Zn1 | - | N11 | - | C16 | = | 65.4 (6)   |
| N1  | - | Zn1 | - | N11 | - | C16 | = | -80.3 (6)  |
| C11 | - | Zn1 | - | N11 | - | C16 | = | 176.1 (5)  |
| N18 | - | Zn1 | - | N11 | - | C16 | = | -14.1 (5)  |
| C16 | - | N11 | - | C12 | - | C13 | = | 2.0 (11)   |
| Zn1 | - | N11 | - | C12 | - | C13 | = | -175.9 (6) |
| N11 | - | C12 | - | C13 | - | C14 | = | -3.1 (12)  |
| C12 | - | C13 | - | C14 | - | C15 | = | 2.1 (12)   |
| C13 | - | C14 | - | C15 | - | C16 | = | -0.3 (12)  |
| C12 | - | N11 | - | C16 | - | C15 | = | -0.1 (11)  |

|     |       |       |       |              |
|-----|-------|-------|-------|--------------|
| Zn1 | - N11 | - C16 | - C15 | = 177.9 (5)  |
| C12 | - N11 | - C16 | - C17 | = 178.2 (7)  |
| Zn1 | - N11 | - C16 | - C17 | = -3.8 (9)   |
| C14 | - C15 | - C16 | - N11 | = -0.8 (12)  |
| C14 | - C15 | - C16 | - C17 | = -178.9 (7) |
| N11 | - C16 | - C17 | - N18 | = 29.9 (9)   |
| C15 | - C16 | - C17 | - N18 | = -151.9 (7) |
| C6  | - C7  | - N18 | - C17 | = -156.0 (6) |
| C6  | - C7  | - N18 | - C29 | = 78.2 (7)   |
| C6  | - C7  | - N18 | - Zn1 | = -38.9 (6)  |
| C16 | - C17 | - N18 | - C7  | = 77.4 (7)   |
| C16 | - C17 | - N18 | - C29 | = -159.8 (6) |
| C16 | - C17 | - N18 | - Zn1 | = -38.8 (6)  |
| O21 | - Zn1 | - N18 | - C7  | = 147.2 (4)  |
| N11 | - Zn1 | - N18 | - C7  | = -90.6 (4)  |
| N1  | - Zn1 | - N18 | - C7  | = 28.7 (4)   |
| C11 | - Zn1 | - N18 | - C7  | = -31.4 (10) |
| O21 | - Zn1 | - N18 | - C17 | = -93.4 (4)  |
| N11 | - Zn1 | - N18 | - C17 | = 28.7 (4)   |
| N1  | - Zn1 | - N18 | - C17 | = 148.1 (5)  |
| C11 | - Zn1 | - N18 | - C17 | = 88.0 (9)   |
| O21 | - Zn1 | - N18 | - C29 | = 30.4 (4)   |
| N11 | - Zn1 | - N18 | - C29 | = 152.6 (5)  |
| N1  | - Zn1 | - N18 | - C29 | = -88.1 (4)  |
| C11 | - Zn1 | - N18 | - C29 | = -148.2 (7) |
| N11 | - Zn1 | - O21 | - C22 | = -53.5 (6)  |
| N1  | - Zn1 | - O21 | - C22 | = 90.7 (6)   |
| C11 | - Zn1 | - O21 | - C22 | = -162.2 (5) |
| N18 | - Zn1 | - O21 | - C22 | = 18.1 (6)   |
| Zn1 | - O21 | - C22 | - C27 | = -39.2 (9)  |
| Zn1 | - O21 | - C22 | - C23 | = 140.9 (5)  |
| O21 | - C22 | - C23 | - C24 | = 173.9 (6)  |
| C27 | - C22 | - C23 | - C24 | = -6.0 (9)   |
| O21 | - C22 | - C23 | - C40 | = -1.8 (9)   |
| C27 | - C22 | - C23 | - C40 | = 178.3 (6)  |
| C22 | - C23 | - C24 | - C25 | = 3.4 (10)   |
| C40 | - C23 | - C24 | - C25 | = 178.9 (6)  |
| C23 | - C24 | - C25 | - C26 | = 1.4 (10)   |
| C23 | - C24 | - C25 | - C28 | = 177.8 (6)  |
| C24 | - C25 | - C26 | - C27 | = -3.5 (9)   |
| C28 | - C25 | - C26 | - C27 | = -179.8 (6) |
| C25 | - C26 | - C27 | - C22 | = 0.7 (10)   |
| C25 | - C26 | - C27 | - C29 | = -178.5 (6) |
| O21 | - C22 | - C27 | - C26 | = -175.7 (6) |
| C23 | - C22 | - C27 | - C26 | = 4.2 (9)    |
| O21 | - C22 | - C27 | - C29 | = 3.4 (10)   |
| C23 | - C22 | - C27 | - C29 | = -176.6 (6) |
| C26 | - C27 | - C29 | - N18 | = -127.9 (6) |
| C22 | - C27 | - C29 | - N18 | = 52.9 (8)   |
| C7  | - N18 | - C29 | - C27 | = -179.1 (5) |
| C17 | - N18 | - C29 | - C27 | = 56.6 (7)   |
| Zn1 | - N18 | - C29 | - C27 | = -63.7 (6)  |
| C24 | - C23 | - C40 | - C51 | = -102.7 (7) |
| C22 | - C23 | - C40 | - C51 | = 72.7 (7)   |
| C24 | - C23 | - C40 | - C41 | = 18.5 (8)   |
| C22 | - C23 | - C40 | - C41 | = -166.1 (6) |
| C24 | - C23 | - C40 | - C61 | = 130.8 (7)  |
| C22 | - C23 | - C40 | - C61 | = -53.8 (8)  |

|      |        |        |        |              |
|------|--------|--------|--------|--------------|
| C51  | - C40  | - C41  | - C42  | = -8.0 (10)  |
| C23  | - C40  | - C41  | - C42  | = -126.2 (7) |
| C61  | - C40  | - C41  | - C42  | = 113.8 (7)  |
| C51  | - C40  | - C41  | - C46  | = 175.0 (6)  |
| C23  | - C40  | - C41  | - C46  | = 56.8 (8)   |
| C61  | - C40  | - C41  | - C46  | = -63.2 (7)  |
| C46  | - C41  | - C42  | - C43  | = -3.2 (11)  |
| C40  | - C41  | - C42  | - C43  | = 179.7 (7)  |
| C41  | - C42  | - C43  | - C44  | = 2.2 (12)   |
| C42  | - C43  | - C44  | - C45  | = 0.1 (11)   |
| C43  | - C44  | - C45  | - C46  | = -1.1 (11)  |
| C44  | - C45  | - C46  | - C41  | = -0.1 (11)  |
| C42  | - C41  | - C46  | - C45  | = 2.2 (10)   |
| C40  | - C41  | - C46  | - C45  | = 179.5 (7)  |
| C23  | - C40  | - C51  | - C56  | = 65.2 (8)   |
| C41  | - C40  | - C51  | - C56  | = -54.3 (8)  |
| C61  | - C40  | - C51  | - C56  | = -168.6 (6) |
| C23  | - C40  | - C51  | - C52  | = -108.5 (7) |
| C41  | - C40  | - C51  | - C52  | = 132.0 (7)  |
| C61  | - C40  | - C51  | - C52  | = 17.7 (9)   |
| C56  | - C51  | - C52  | - C53  | = 5.9 (10)   |
| C40  | - C51  | - C52  | - C53  | = 179.7 (6)  |
| C51  | - C52  | - C53  | - C54  | = -3.3 (11)  |
| C52  | - C53  | - C54  | - C55  | = 0.7 (12)   |
| C53  | - C54  | - C55  | - C56  | = -0.9 (12)  |
| C52  | - C51  | - C56  | - C55  | = -6.2 (11)  |
| C40  | - C51  | - C56  | - C55  | = 179.9 (7)  |
| C54  | - C55  | - C56  | - C51  | = 3.7 (11)   |
| C51  | - C40  | - C61  | - C62  | = -136.0 (7) |
| C23  | - C40  | - C61  | - C62  | = -13.3 (9)  |
| C41  | - C40  | - C61  | - C62  | = 103.6 (7)  |
| C51  | - C40  | - C61  | - C66  | = 50.1 (9)   |
| C23  | - C40  | - C61  | - C66  | = 172.9 (6)  |
| C41  | - C40  | - C61  | - C66  | = -70.2 (7)  |
| C66  | - C61  | - C62  | - C63  | = -1.6 (10)  |
| C40  | - C61  | - C62  | - C63  | = -175.5 (6) |
| C61  | - C62  | - C63  | - C64  | = -1.9 (11)  |
| C62  | - C63  | - C64  | - C65  | = 3.4 (12)   |
| C63  | - C64  | - C65  | - C66  | = -1.2 (12)  |
| C62  | - C61  | - C66  | - C65  | = 3.7 (11)   |
| C40  | - C61  | - C66  | - C65  | = 177.7 (7)  |
| C64  | - C65  | - C66  | - C61  | = -2.3 (12)  |
| C106 | - C101 | - C102 | - C103 | = -0.4 (13)  |
| C101 | - C102 | - C103 | - C104 | = 0.2 (13)   |
| C102 | - C103 | - C104 | - C105 | = -0.7 (13)  |
| C103 | - C104 | - C105 | - C106 | = 1.6 (13)   |
| C102 | - C101 | - C106 | - C105 | = 1.2 (12)   |
| C104 | - C105 | - C106 | - C101 | = -1.8 (12)  |
